# Supplementary material for: Organocatalytic asymmetric spirocyclization reactions of cyclic 2,4-dienones with cyanoketones: synthesis of spiro-dihydropyrano cyclohexanones
Source: Royal Society of Chemistry journal article supplement (doi:10.1039/c9ob01415b), 2019-01-01
Supplement: c9ob01415b1.pdf [file c9ob01415b1.pdf]

# Organocatalytic Asymmetric Spirocyclization Reactions of Cyclic 2,4-dienones with Cyanoketones: Synthesis of Spiro-Dihydropyrano Cyclohexanones

Buddhadeb Mondal<sup>a</sup>, Megha Balha<sup>a</sup> and Subhas Chandra Pan\*

Department of Chemistry, Indian Institute of Technology Guwahati,

North Guwahati, Assam, 781039

## Table of contents

|                                                                       |         |
|-----------------------------------------------------------------------|---------|
| 1. General information.....                                           | S2      |
| 2. General procedure for the synthesis of dienones.....               | S2      |
| 3. General procedure for the synthesis of catalyst.....               | S2      |
| 4. Catalyst optimization.....                                         | S2-S3   |
| 5. Solvent optimization.....                                          | S3      |
| 6. Acid additive.....                                                 | S4      |
| 7. General procedure for the synthesis of compound <b>3a-3o</b> ..... | S4-S5   |
| 8. Characterization of the products .....                             | S5-S13  |
| 9. Crystal structure and data.....                                    | S13-S14 |
| 10. NMR and HPLC spectra of the products.....                         | S15-S46 |
| 11. References.....                                                   | S47     |

**1. General Information:** Chemicals and solvents were purchased from commercial suppliers and used as received.  $^1\text{H}$  NMR spectra were recorded on 400 MHz, 500 MHz and 600 MHz spectrometer.  $^{13}\text{C}$  NMR spectra were recorded on 100 MHz, 125 MHz and 150 MHz. Chemical shifts were reported in parts per million (ppm), and the residual solvent peak was used as an internal reference: proton (chloroform  $\delta$  7.260), carbon (chloroform  $\delta$  77.23). Multiplicity was indicated as follows: s (singlet), d (doublet), t (triplet), q (quartet), m (multiplet), dd (doublet of doublet), brs (broad singlet). Coupling constants were reported in Hertz (Hz). High-resolution mass spectra (HRMS) were recorded in Q-TOF electron spray ionization (ESI). Enantiomeric ratios were determined by HPLC analysis using Dionex (Ultimate 3000) instrument with chiral columns using a Daicel Chiralpak IA Column, Daicel Chiralpak IB Column, Daicel Chiralpak IC Column, Daicel Chiralpak ID Column. For visualizing the products UV light and  $\text{I}_2$  were used. Toluene was distilled over  $\text{CaH}_2$  under argon and stored over  $4\text{A}^\circ$  molecular sieves. DCM was distilled over  $\text{CaH}_2$  under argon and stored over  $4\text{A}^\circ$  molecular sieves. Silica gel (60-120 mesh size) was used for the column chromatography. Reactions were monitored by TLC on silica gel 60 F254 (0.25 mm).

## 2. General procedure for the synthesis of Dienones:

Dienones **1a-1g** were prepared according to reported procedure.<sup>1</sup>

## 3. General procedure for the synthesis of catalyst:

The catalyst (**I**, **II** and **III**) was prepared according to reported procedures.<sup>2</sup>

## 4. Catalyst optimization (Table S1):

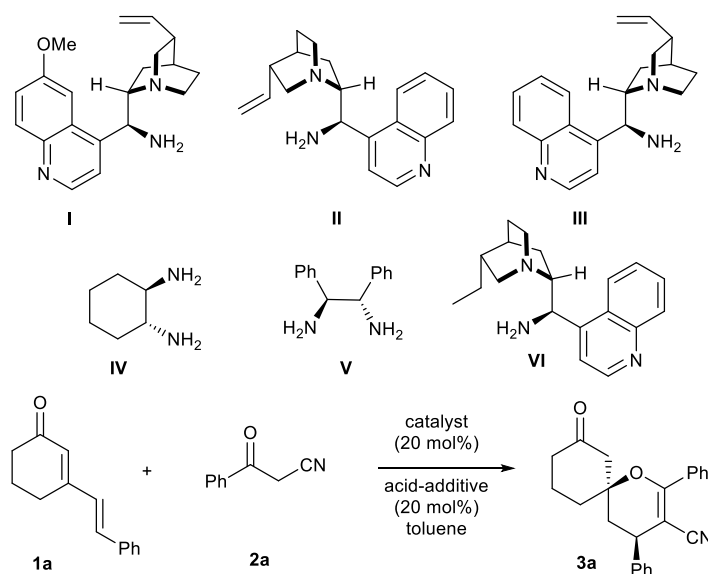

### Scheme S1

| entry <sup>a</sup> | catalyst   | acid-additive       | yield <sup>b</sup> | dr <sup>c</sup> | ee <sup>d</sup> |
|--------------------|------------|---------------------|--------------------|-----------------|-----------------|
| 1                  | <b>I</b>   | PhCO <sub>2</sub> H | 70                 | 1.2:1           | 52/54           |
| 2                  | <b>II</b>  | PhCO <sub>2</sub> H | 74                 | 1.3:1           | 77/80           |
| 3                  | <b>III</b> | PhCO <sub>2</sub> H | 75                 | 1.3:1           | 82/79           |
| 4                  | <b>IV</b>  | PhCO <sub>2</sub> H | 66                 | 1.1:1           | 18/20           |
| 5                  | <b>V</b>   | PhCO <sub>2</sub> H | 68                 | 1.1:1           | 42/36           |
| 6                  | <b>VI</b>  | PhCO <sub>2</sub> H | 70                 | 1.1:1           | -77/-80         |

<sup>a</sup>Unless otherwise mentioned, reactions were carried out with 0.06 mmol of **1a** with 0.05 mmol of **2a** in 0.5 ml solvent using 20 mol% catalyst and 20 mol% acid additive at room temperature for 2 days. <sup>b</sup>Isolated combined yield after silica gel column chromatography. <sup>c</sup>Determined by <sup>1</sup>H NMR of crude reaction mixture. <sup>d</sup>Determined by chiral HPLC.

### 5. Solvent optimization (Table S2):

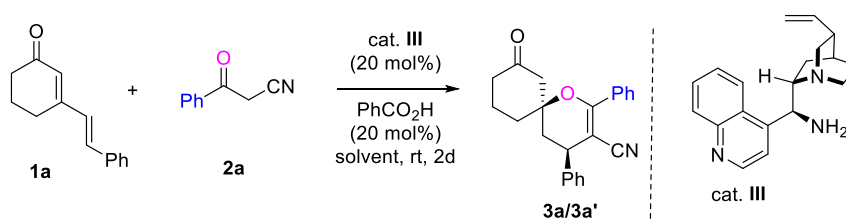

### Scheme S2

| entry <sup>a</sup> | solvent                         | yield (%) <sup>b</sup> | dr <sup>c</sup> | ee <sup>d</sup> |
|--------------------|---------------------------------|------------------------|-----------------|-----------------|
| 1                  | CHCl <sub>3</sub>               | 69                     | 1.1:1           | 82/72           |
| 2                  | CH <sub>2</sub> Cl <sub>2</sub> | 58                     | 1.1:1           | 76/20           |
| 3                  | PhCF <sub>3</sub>               | 73                     | 1:1             | 78/78           |
| 3                  | MTBE                            | 68                     | 1.2:1           | 80/78           |
| 4                  | mesitylene                      | 70                     | 1.2:1           | 81/74           |
| <b>5</b>           | <b>toluene</b>                  | <b>75</b>              | <b>1.3:1</b>    | <b>82/79</b>    |

<sup>a</sup>Unless otherwise mentioned, reactions were carried out with 0.06 mmol of **1a** with 0.05 mmol of **2a** in 0.5 ml solvent using 20 mol% cat. **III** and 20 mol% PhCO<sub>2</sub>H at room temperature for 2 days. <sup>b</sup>Isolated combined yield after silica gel column chromatography. <sup>c</sup>Determined by <sup>1</sup>H NMR of crude reaction mixture. <sup>d</sup>Determined by chiral HPLC.

## 6. Acid-additive optimization (Table S3):

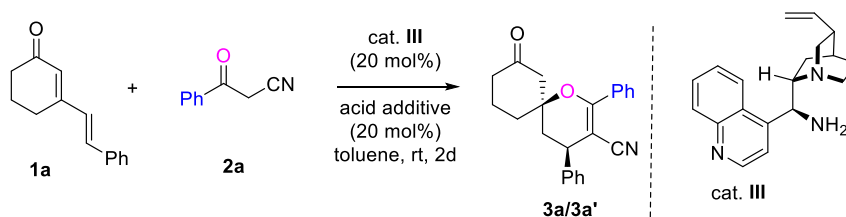

Scheme S3

| entry <sup>a</sup>   | acid-additive                                        | yield (%) <sup>b</sup> | dr <sup>c</sup> | ee <sup>d</sup> |
|----------------------|------------------------------------------------------|------------------------|-----------------|-----------------|
| 1                    | 2-OHC <sub>6</sub> H <sub>4</sub> CO <sub>2</sub> H  | 79                     | 1:1             | 88/78           |
| 2                    | 4-OMeC <sub>6</sub> H <sub>4</sub> CO <sub>2</sub> H | 70                     | 1.1             | 80/71           |
| 3                    | ( <i>R</i> )-3-Phenyllactic acid                     | 68                     | 1:1             | 87/77           |
| 4                    | <i>D</i> -CSA                                        | 73                     | 1:1             | 88/79           |
| 5                    | <i>N</i> -Boc- <i>l</i> -leucine                     | 80                     | 1.1:1           | 90/88           |
| <b>6<sup>e</sup></b> | <b><i>N</i>-Boc-<i>l</i>-leucine</b>                 | <b>85</b>              | <b>1.2:1</b>    | <b>95/92</b>    |

<sup>a</sup>Unless otherwise mentioned, reactions were carried out with 0.06 mmol of **1a** with 0.05 mmol of **2a** in 0.5 mL solvent using 20 mol% cat. **III** and 20 mol% acid additive at room temperature for 2 days. <sup>b</sup>Isolated combined yield after silica gel column chromatography. <sup>c</sup>Determined by <sup>1</sup>H NMR of crude reaction mixture. <sup>d</sup>Determined by chiral HPLC. <sup>e</sup>Reaction was carried out at 0 °C and for 5 days.

## 7. General procedure for the synthesis of compound **3**:

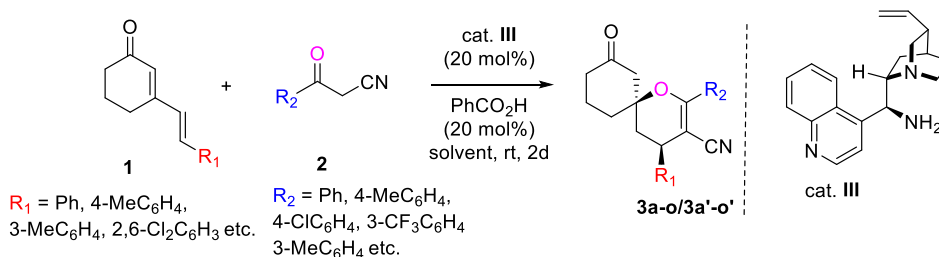

In an oven dried round bottom flask, **1** (0.24 mmol), **2** (0.2 mmol), 20 mol% of catalyst **III** and 20 mol% of *N*-Boc (*L*)-tert-leucine were taken. 2 mL of toluene was added to the reaction mixture and stirred at 0 °C for 5 days. Completion of reaction was checked by TLC. After the completion of reaction, solvent was concentrated and reaction mixture was directly purified by

column chromatography on silica gel eluting with hexane/ethyl acetate (25-30 %) to afford desired product **3a-3o**.

## 8. Characterisation of the products:

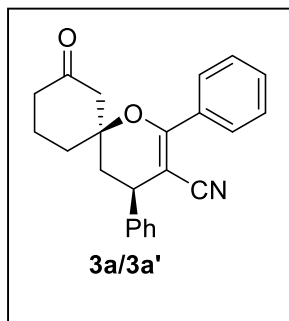

**(4R,6R)-8-oxo-2,4-diphenyl-1-oxaspiro[5.5]undec-2-ene-3-carbonitrile (3a):** Light yellow sticky solid; 85% yield (58.4 mg); 1.2:1 dr. <sup>1</sup>H NMR (400 MHz, CDCl<sub>3</sub>) δ 7.75 (d, *J* = 7.8 Hz, 2H), 7.64 (d, *J* = 6.5 Hz, 2H), 7.45 – 7.38 (m, 10H), 7.32 (d, *J* = 6.2 Hz, 6H), 3.78 (dd, *J* = 11.6, 6.5 Hz, 1H), 3.68 (dd, *J* = 11.9, 6.5 Hz, 1H), 2.98 (d, *J* = 14.3 Hz, 1H), 2.68 (d, *J* = 14.7 Hz, 1H), 2.62 – 2.46 (m, 4H), 2.46 – 2.32 (m, 3H), 2.22 (dt, *J* = 18.1, 9.1 Hz, 4H), 2.12 – 1.84 (m,

9H). <sup>13</sup>C NMR (100 MHz, CDCl<sub>3</sub>) δ 207.9, 207.3, 164.4, 164.2, 140.9, 140.8, 133.3, 133.1, 131.2, 131.1, 129.3, 128.6, 128.6, 128.4, 127.9, 127.9, 119.5, 119.3, 87.8, 87.3, 82.3, 82.0, 52.7, 47.6, 41.7, 41.2, 41.0, 40.7, 38.5, 38.1, 36.3, 30.9, 29.8, 20.8, 20.6. **HPLC Analysis:** 95% ee (*t*<sub>major</sub> = 18.3 min, *t*<sub>minor</sub> = 25.2 min) and 92% ee (*t*<sub>major</sub> = 19.7 min, *t*<sub>minor</sub> = 21.4 min); Chiralpak IA Column, n-Hexane/EtOH = 90/10, flow rate 1.0 mL/min, 25 °C, λ = 254 nm. **HRMS (+ESI-TOF) *m/z*:** calcd. For C<sub>23</sub>H<sub>22</sub>NO<sub>2</sub> [M+H]<sup>+</sup> 344.1645, found 344.1650.

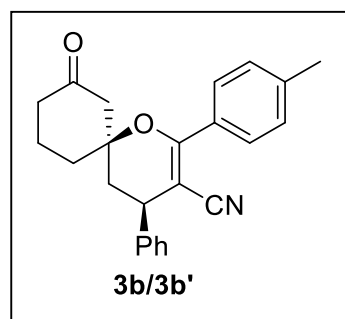

**(4R,6R)-8-oxo-4-phenyl-2-(p-tolyl)-1-oxaspiro[5.5]undec-2-ene-3-carbonitrile (3b):** Colorless sticky solid; 78% (55.7 mg); 1.3:1 dr. <sup>1</sup>H NMR (600 MHz, CDCl<sub>3</sub>) δ 7.64 (d, *J* = 8.2 Hz, 2H), 7.53 (d, *J* = 8.1 Hz, 2H), 7.39 (t, *J* = 7.5 Hz, 4H), 7.36 – 7.28 (m, 7H), 7.21 (d, *J* = 7.1 Hz, 4H), 3.77 (dd, *J* = 11.7, 6.5 Hz, 1H), 3.67 (dd, *J* = 11.9, 6.5 Hz, 1H), 2.97 (d, *J* = 14.3 Hz, 1H), 2.66 (d, *J* =

14.8 Hz, 1H), 2.54 (dd, *J* = 14.7, 10.2 Hz, 3H), 2.51 (t, *J* = 11.0 Hz, 3H), 2.47 – 2.39 (m, 3H), 2.38 (d, *J* = 2.5 Hz, 7H), 2.29 – 2.17 (m, 3H), 2.06 (dd, *J* = 12.8, 8.7 Hz, 3H), 2.03 – 1.96 (m, 2H), 1.96 – 1.84 (m, 4H). <sup>13</sup>C NMR (151 MHz, CDCl<sub>3</sub>) δ 208.0, 207.5, 164.5, 164.2, 141.6, 141.5, 141.0, 140.9, 130.4, 130.2, 129.2, 128.4, 128.3, 127.9, 127.8, 119.8, 119.5, 87.1, 86.5, 82.2, 81.9, 52.7, 47.5, 41.6, 41.2, 41.0, 40.7, 38.5, 38.0, 36.3, 30.8, 21.6, 21.6, 20.80, 20.6. **HPLC Analysis:** 89% ee (*t*<sub>major</sub> = 18.7 min, *t*<sub>minor</sub> = 24.4 min) and 97% ee (*t*<sub>major</sub> = 21.4 min, *t*<sub>minor</sub> = 23.7 min); Chiralpak IB Column, n-Hexane/EtOH = 90/10, flow rate 1.0 mL/min, 25 °C, λ = 254 nm. **HRMS (+ESI-TOF) *m/z*:** calcd. For C<sub>24</sub>H<sub>24</sub>NO<sub>2</sub> [M+H]<sup>+</sup> 358.1802, found 358.1804.

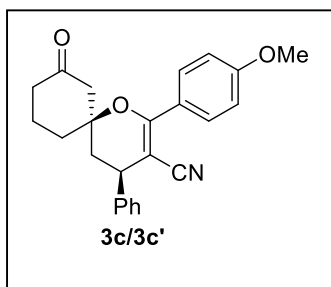

**(4R,6R)-2-(4-methoxyphenyl)-8-oxo-4-phenyl-1-oxaspiro[5.5]undec-2-ene-3-carbonitrile (3c):** Brown sticky solid; 73% (54.5 mg); 1:1 dr. <sup>1</sup>H NMR (600 MHz, CDCl<sub>3</sub>) δ 7.72 (d, *J* = 8.9 Hz, 2H), 7.60 (d, *J* = 8.8 Hz, 2H), 7.41 – 7.35 (m, 4H), 7.31 (d, *J* = 7.3 Hz, 6H), 6.91 (d, *J* = 8.7 Hz, 4H), 3.82 (d, *J* = 3.3 Hz, 6H), 3.79 – 3.74 (m, 1H), 3.66 (dd, *J* = 11.9, 6.6 Hz, 1H), 2.97 (d, *J* = 14.2 Hz, 1H), 2.66 (d, *J* = 14.6 Hz, 1H), 2.58 – 2.37 (m, 7H), 2.28 – 2.15 (m, 3H), 2.10 – 1.97 (m, 4H), 1.95 – 1.83 (m, 4H). <sup>13</sup>C NMR (150 MHz, CDCl<sub>3</sub>) δ 208.2, 207.7, 164.0, 163.7, 161.7, 141.1, 141.0, 131.4, 130.1, 130.0, 129.2, 127.8, 125.6, 125.3, 120.1, 119.8, 113.9, 86.3, 85.6, 82.2, 81.9, 55.5, 52.7, 47.5, 41.7, 41.2, 41.0, 40.7, 38.5, 38.1, 36.3, 30.7, 29.8, 28.4, 26.6, 20.8, 20.7, 14.3. **HPLC Analysis:** 91% ee (*t*<sub>major</sub> = 20.2 min, *t*<sub>minor</sub> = 26.5 min) and 93% ee (*t*<sub>major</sub> = 23.9 min, *t*<sub>minor</sub> = 31.9 min); Chiralpak IB Column, n-Hexane/EtOH = 90/10, flow rate 1.0 mL/min, 25 °C, λ = 254 nm. **HRMS (+ESI-TOF) *m/z*:** calcd. For C<sub>24</sub>H<sub>24</sub>NO<sub>3</sub> [M+H]<sup>+</sup> 374.1751, found 374.1761.

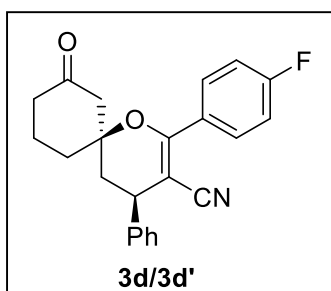

**(4R,6R)-2-(4-fluorophenyl)-8-oxo-4-phenyl-1-oxaspiro[5.5]undec-2-ene-3-carbonitrile (3d):** Brown sticky solid; 69% (50.0 mg); 1.3:1 dr. <sup>1</sup>H NMR (600 MHz, CDCl<sub>3</sub>) δ 7.77 – 7.72 (m, 2H), 7.64 – 7.61 (m, 2H), 7.39 (t, *J* = 6.8 Hz, 5H), 7.31 (t, *J* = 9.0 Hz, 7H), 7.11-7.07 (m, 5H), 3.77 (dd, *J* = 11.7, 6.5 Hz, 1H), 3.67 (dd, *J* = 12.0, 6.5 Hz, 1H), 2.97 (d, *J* = 14.2 Hz, 1H), 2.67 (d, *J* = 14.7 Hz, 1H), 2.54 (dd, *J* = 26.3, 14.2 Hz, 4H), 2.47 – 2.38 (m, 4H), 2.27 – 2.17 (m, 4H), 2.11 – 1.99 (m, 5H), 1.96 – 1.86 (m, 4H). <sup>13</sup>C NMR (150 MHz, CDCl<sub>3</sub>) δ 208.1, 207.4, 165.1, 163.4, 163.4, 163.3, 163.0, 140.7, 140.6, 130.8, 130.7, 130.6, 129.3, 128.0, 127.9, 127.8, 119.5, 119.2, 115.8, 115.7, 87.9, 87.2, 82.5, 82.3, 52.7, 47.6, 41.6, 41.1, 41.0, 40.7, 38.4, 38.0, 36.3, 30.9, 20.8, 20.7. **HPLC Analysis:** 90% ee (*t*<sub>major</sub> = 20.3 min, *t*<sub>minor</sub> = 16.1 min) and 83% ee (*t*<sub>major</sub> = 52.8 min, *t*<sub>minor</sub> = 19.0 min); Chiralpak IB Column, n-Hexane/EtOH = 90/10, flow rate 1.0 mL/min, 25 °C, λ = 254 nm. **HRMS (+ESI-TOF) *m/z*:** calcd. For C<sub>23</sub>H<sub>21</sub>FNO<sub>2</sub> [M+H]<sup>+</sup> 362.1551, found 362.1559.

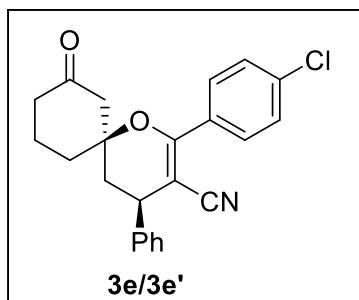

**(4R,6R)-2-(4-chlorophenyl)-8-oxo-4-phenyl-1-oxaspiro[5.5]undec-2-ene-3-carbonitrile (3e):** White semi solid; 75% (56.7 mg); 2:1 dr.  $^1\text{H NMR}$  (600 MHz,  $\text{CDCl}_3$ )  $\delta$  7.69 (d,  $J = 8.6$  Hz, 2H), 7.57 (d,  $J = 8.6$  Hz, 3H), 7.42 – 7.36 (m, 12H), 7.40 – 7.37 (m, 10H), 3.77 (dd,  $J = 11.7, 6.5$  Hz, 1H), 3.67 (dd,  $J = 12.0, 6.5$  Hz, 2H), 2.96 (d,  $J = 14.2$  Hz, 2H), 2.67 (d,  $J =$

14.7 Hz, 1H), 2.59 – 2.49 (m, 5H), 2.49 – 2.33 (m, 4H), 2.27 – 2.15 (m, 5H), 2.11 – 1.99 (m, 6H), 1.98 – 1.85 (m, 7H).  $^{13}\text{C NMR}$  (150 MHz,  $\text{CDCl}_3$ )  $\delta$  208.0, 207.3, 163.2, 162.9, 140.6, 140.5, 137.2, 131.7, 131.4, 129.9, 129.7, 129.3, 129.10 128.9, 128.0, 127.9, 127.8, 127.5, 119.3, 119.0, 88.3, 87.7, 82.6, 82.4, 52.7, 47.6, 41.5, 41.0, 40.7, 38.5, 38.0, 36.3, 20.8, 20.7. **HPLC Analysis:** 89% ee ( $t_{\text{major}} = 21.3$  min,  $t_{\text{minor}} = 19.9$  min) and 97% ee ( $t_{\text{major}} = 26.5$  min,  $t_{\text{minor}} = 24.5$  min); Chiralpak IB Column, n-Hexane/EtOH = 90/10, flow rate 1.0 mL/min, 25  $^\circ\text{C}$ ,  $\lambda = 254$  nm. **HRMS (+ESI-TOF)  $m/z$ :** calcd. For  $\text{C}_{23}\text{H}_{21}\text{ClNO}_2$   $[\text{M}+\text{H}]^+$  378.1255, found 378.1268.

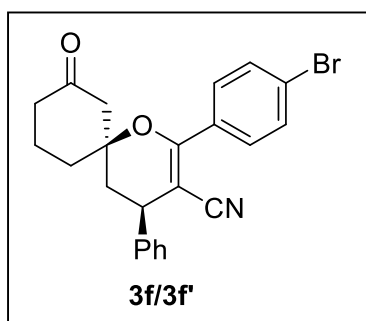

**(4R,6R)-2-(4-bromophenyl)-8-oxo-4-phenyl-1-oxaspiro[5.5]undec-2-ene-3-carbonitrile (3f):** Brown sticky solid; 72% (60.6 mg); 1.3:1 dr.  $^1\text{H NMR}$  (600 MHz,  $\text{CDCl}_3$ )  $\delta$  7.62 (d,  $J = 8.6$  Hz, 2H), 7.55 – 7.53 (m, 4H), 7.49 (d,  $J = 8.6$  Hz, 2H), 7.43 – 7.37 (m, 5H), 7.36 – 7.27 (m, 7H), 3.76 (dd,  $J = 11.7, 6.5$  Hz, 1H), 3.66 (dd,  $J = 11.9, 6.5$  Hz, 1H), 2.95 (d,  $J = 14.2$  Hz, 1H), 2.67 (d,  $J = 14.6$  Hz, 1H), 2.53 (dd,  $J = 26.4, 14.0$  Hz, 4H),

2.47 – 2.35 (m, 4H), 2.27 – 2.15 (m, 4H), 2.10 – 1.99 (m, 5H), 1.97 – 1.87 (m, 4H).  $^{13}\text{C NMR}$  (150 MHz,  $\text{CDCl}_3$ )  $\delta$  207.9, 207.3, 163.3, 163.0, 140.5, 132.1, 131.9, 130.1, 129.9, 129.3, 128.0, 127.9, 127.8, 125.6, 119.2, 119.0, 88.4, 87.8, 82.6, 82.4, 52.7, 47.6, 41.5, 41.0, 40.7, 38.5, 38.0, 36.3, 30.9, 20.8, 20.7. **HPLC Analysis:** 91% ee ( $t_{\text{major}} = 27.1$  min,  $t_{\text{minor}} = 33.1$  min) and 84% ee ( $t_{\text{major}} = 20.0$  min,  $t_{\text{minor}} = 24.1$  min); Chiralpak Lux cellulose-1 Column, n-Hexane/EtOH = 90/10, flow rate 1.0 mL/min, 25  $^\circ\text{C}$ ,  $\lambda = 254$  nm. **HRMS (+ESI-TOF)  $m/z$ :** calcd. For  $\text{C}_{23}\text{H}_{21}\text{BrNO}_2$   $[\text{M}+\text{H}]^+$  422.0750, found 422.0749.

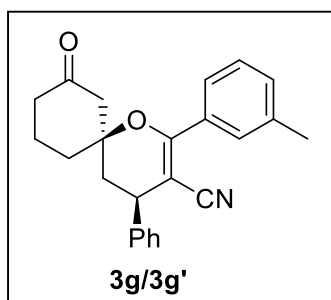

**(4R,6R)-8-oxo-4-phenyl-2-(m-tolyl)-1-oxaspiro[5.5]undec-2-ene-3-carbonitrile (3g):** Light yellow sticky solid; 70% (50.0 mg);

1.4:1 dr. <sup>1</sup>H NMR (400 MHz, CDCl<sub>3</sub>) δ 7.43 (d, *J* = 7.2 Hz, 2H), 7.33 (dd, *J* = 16.9, 8.5 Hz, 7H), 7.27 – 7.21 (m, 9H), 7.18 (dd, *J* = 7.9, 5.6 Hz, 4H), 3.68 (dd, *J* = 11.7, 6.5 Hz, 1H), 3.59 (dd, *J* = 11.9, 6.5 Hz, 1H), 2.89 (d, *J* = 14.3 Hz, 1H), 2.59 (d, *J* = 14.7 Hz, 1H),

2.51 – 2.37 (m, 5H), 2.30 (s, 10H), 2.13 (dd, *J* = 14.0, 6.5 Hz, 4H), 2.01-1.76 (m, 10H). <sup>13</sup>C NMR (150 MHz, CDCl<sub>3</sub>) δ 208.0, 207.5, 164.3, 164.0, 140.8, 140.7, 138.9, 138.8, 133.3, 133.1, 131.1, 129.1, 128.7, 128.7, 128.6, 128.5, 128.4, 124.9, 119.6, 119.4, 87.9, 87.39 82.3, 82.0, 52.8, 47.6, 41.7, 41.2, 41.0, 40.7, 38.4, 38.0, 36.3, 30.8, 21.7, 20.8, 20.6. **HPLC Analysis:** 91% ee (*t*<sub>major</sub> = 20.4 min, *t*<sub>minor</sub> = 16.9 min) and 98% ee (*t*<sub>major</sub> = 19.1 min, *t*<sub>minor</sub> = 1.3 min); Chiralpak IB Column, n-Hexane/EtOH = 90/10, flow rate 1.0 mL/min, 25 °C, λ = 254 nm. **HRMS (+ESI-TOF) *m/z*:** calcd. For C<sub>24</sub>H<sub>24</sub>NO<sub>2</sub> [M+H]<sup>+</sup> 358.1802, found 358.1800.

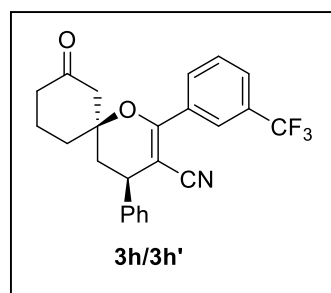

**(4R,6R)-8-oxo-4-phenyl-2-(3-(trifluoromethyl)phenyl)-1-oxaspiro[5.5]undec-2-ene-3-carbonitrile (3h):** Brown sticky solid; 65% (53.4 mg); 1.5:1 dr. <sup>1</sup>H NMR (400 MHz, CDCl<sub>3</sub>) δ

7.86 (s, 2H), 7.78 (d, *J* = 12.5 Hz, 3H), 7.64 (d, *J* = 7.7 Hz, 2H), 7.50 – 7.44 (m, 2H), 7.34 – 7.31 (m, 5H), 7.26 – 7.22 (m, 8H), 7.18 (s, 1H), 3.71 (dd, *J* = 11.7, 6.4 Hz, 1H), 3.63 (dd, *J* = 11.9, 6.5 Hz,

1H), 2.89 (d, *J* = 14.3 Hz, 1H), 2.63 (d, *J* = 14.7 Hz, 1H), 2.46 (dd, *J* = 14.4, 10.8 Hz, 4H), 2.40 – 2.29 (m, 4H), 2.18 (dd, *J* = 14.1, 6.5 Hz, 4H), 2.06 – 1.80 (m, 10H). <sup>13</sup>C NMR (100 MHz, CDCl<sub>3</sub>) δ 207.5, 206.9, 162.7, 162.6, 140.4, 140.3, 134.2, 134.0, 131.94 131.7, 131.4, 131.0, 129.4, 129.3, 129.1, 128.1, 127.9, 125.4, 125.2, 118.7, 118.5, 89.3, 88.9, 82.8, 82.6, 52.8, 47.8, 41.4, 40.9, 40.8, 40.6, 38.4, 38.1, 36.3, 31.1, 29.9, 20.7, 20.7. **HPLC Analysis:** 99% ee (*t*<sub>major</sub> = 26.0 min, *t*<sub>minor</sub> = 32.8 min) and 41% ee (*t*<sub>major</sub> = 29.5 min, *t*<sub>minor</sub> = 22.2 min); Chiralpak IB Column, n-Hexane/EtOH = 90/10, flow rate 1.0 mL/min, 25 °C, λ = 254 nm. **HRMS (+ESI-TOF) *m/z*:** calcd. For C<sub>24</sub>H<sub>21</sub>F<sub>3</sub>NO<sub>2</sub> [M+H]<sup>+</sup> 412.1519, found 412.1514.



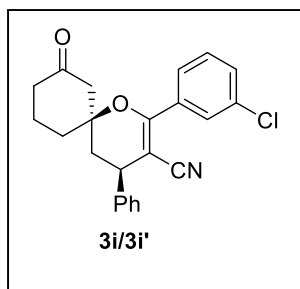

**(4R,6R)-2-(3-chlorophenyl)-8-oxo-4-phenyl-1-oxaspiro[5.5]undec-**

**2-ene-3-carbonitrile (3i):** Light brown sticky solid; 71% (53.8 mg);

1.7:1 dr. <sup>1</sup>H NMR (400 MHz, CDCl<sub>3</sub>) δ 7.65 (d, *J* = 8.9 Hz, 2H),

7.58 – 7.52 (m, 3H), 7.48 – 7.27 (m, 19H), 3.76 (dd, *J* = 11.7, 6.5

Hz, 1H), 3.68 (dd, *J* = 11.9, 6.5 Hz, 2H), 2.95 (d, *J* = 14.2 Hz, 2H),

2.69 (d, *J* = 14.8 Hz, 1H), 2.62 – 2.48 (m, 5H), 2.48 – 2.33 (m, 4H),

2.23 (dd, *J* = 14.1, 6.6 Hz, 5H), 2.16 – 1.86 (m, 11H). <sup>13</sup>C NMR (100 MHz, CDCl<sub>3</sub>) δ 207.6,

162.9, 162.7, 140.5, 140.4, 135.0, 134.6, 131.2, 131.1, 129.9, 129.3, 128.5, 128.3, 128.1, 128.0,

127.9, 126.8, 126.7, 118.9, 118.73 88.9, 82.6, 82.4, 52.7, 47.7, 41.4, 40.9, 40.6, 38.5, 38.1,

36.3, 20.7, 20.6. **HPLC Analysis:** 98% ee (*t*<sub>major</sub> = 24.7 min, *t*<sub>minor</sub> = 26.1 min) and 69% ee

(*t*<sub>major</sub> = 28.6 min, *t*<sub>minor</sub> = 20.0 min); Chiralpak IB Column, n-Hexane/EtOH = 90/10, flow rate

1.0 mL/min, 25 °C, λ = 254 nm. **HRMS (+ESI-TOF) *m/z*:** calcd. For C<sub>23</sub>H<sub>22</sub>ClNO<sub>2</sub> [M+H]<sup>+</sup>

378.1255, found 378.1264.

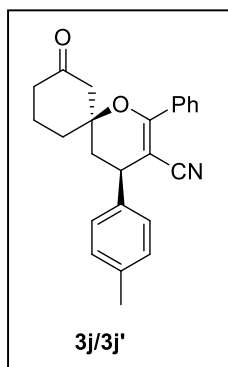

**(4R,6R)-8-oxo-2-phenyl-4-(p-tolyl)-1-oxaspiro[5.5]undec-2-ene-3-**

**carbonitrile (3j):** Colorless sticky solid; 79% (56.4 mg); 1.5:1 dr. <sup>1</sup>H NMR

(600 MHz, CDCl<sub>3</sub>) δ 7.74 (d, *J* = 7.1 Hz, 2H), 7.63 (d, *J* = 7.0 Hz, 3H),

7.48 – 7.38 (m, 7H), 7.20 (d, *J* = 2.4 Hz, 9H), 3.74 (dd, *J* = 11.7, 6.5 Hz,

1H), 3.65 (dd, *J* = 12.0, 6.5 Hz, 1H), 2.98 (d, *J* = 14.3 Hz, 1H), 2.67 (d, *J*

= 14.7 Hz, 1H), 2.53 (dd, *J* = 33.4, 13.9 Hz, 5H), 2.48 – 2.39 (m, 4H), 2.35

(d, *J* = 2.0 Hz, 7H), 2.27 – 2.18 (m, 4H), 2.06 (d, *J* = 9.8 Hz, 5H), 1.98 –

1.84 (m, 5H). <sup>13</sup>C NMR (150 MHz, CDCl<sub>3</sub>) δ 208.0, 207.5, 164.2, 164.0, 137.8, 137.7, 137.6,

137.5, 133.3, 133.1, 131.1, 131.0, 129.9, 128.6, 128.5, 128.4, 127.7, 119.6, 119.4, 88.1, 87.5,

82.3, 82.0, 52.8, 47.6, 41.7, 41.2, 41.0, 40.7, 38.1, 37.6, 36.3, 30.9, 21.3, 20.8, 20.6. **HPLC**

**Analysis:** 92% ee (*t*<sub>major</sub> = 12.2 min, *t*<sub>minor</sub> = 13.8 min) and 95% ee (*t*<sub>major</sub> = 18.4 min, *t*<sub>minor</sub> =

15.4 min); Chiralpak IB Column, n-Hexane/EtOH = 90/10, flow rate 1.0 mL/min, 25 °C, λ =

254 nm. **HRMS (+ESI-TOF) *m/z*:** calcd. For C<sub>23</sub>H<sub>24</sub>NO<sub>2</sub> [M+H]<sup>+</sup> 358.1802, found 358.1811.

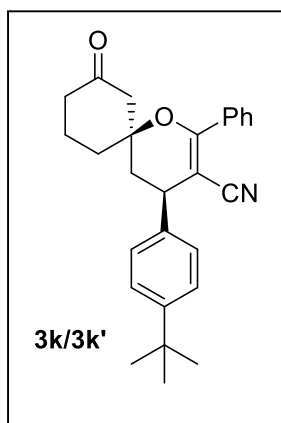

**(4R,6R)-4-(4-(tert-butyl)phenyl)-8-oxo-2-phenyl-1-oxaspiro[5.5]undec-2-ene-3-carbonitrile (3k):** Off white semisolid; 80% (63.9 mg); 1.3:1 dr. **<sup>1</sup>H NMR (600 MHz, CDCl<sub>3</sub>)** δ 7.66 (d, *J* = 7.2 Hz, 2H), 7.55 (d, *J* = 7.1 Hz, 3H), 7.38 – 7.32 (m, 11H), 7.17 (dd, *J* = 8.3, 6.6 Hz, 5H), 3.68 (dd, *J* = 11.7, 6.5 Hz, 1H), 3.59 (dd, *J* = 11.9, 6.5 Hz, 1H), 2.91 (d, *J* = 14.3 Hz, 1H), 2.59 (d, *J* = 14.7 Hz, 1H), 2.45 (dt, *J* = 14.7, 9.9 Hz, 5H), 2.40 – 2.30 (m, 4H), 2.18 – 2.11 (m, 4H), 2.02 – 1.97 (m, 3H), 1.90 – 1.80 (m, 5H), 1.25 (d, *J* = 2.1 Hz, 21H).

**<sup>13</sup>C NMR (150 MHz, CDCl<sub>3</sub>)** δ 208.0, 207.5, 164.3, 164.0, 140.8, 140.7, 138.9, 138.8, 133.3, 133.1, 131.1, 129.1, 128.7, 128.7, 128.6, 128.5, 128.4, 124.9, 119.6, 119.4, 87.9, 87.3, 82.3, 82.0, 52.8, 47.6, 41.7, 41.2, 41.0, 40.7, 38.4, 38.0, 36.3, 30.8, 21.7, 20.8, 20.6. **HPLC Analysis:** 95% ee (*t*<sub>major</sub> = 16.3 min, *t*<sub>minor</sub> = 17.9 min) and 98% ee (*t*<sub>major</sub> = 12.6 min, *t*<sub>minor</sub> = 9.4 min); Chiralpak ID Column, n-Hexane/EtOH = 90/10, flow rate 1.0 mL/min, 25 °C, λ = 254 nm. **HRMS (+ESI-TOF) *m/z*:** calcd. For C<sub>27</sub>H<sub>30</sub>NO<sub>2</sub> [M+H]<sup>+</sup> 400.2271, found 400.2269.

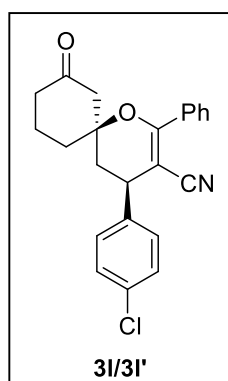

**(4R,6R)-4-(4-chlorophenyl)-8-oxo-2-phenyl-1-oxaspiro[5.5]undec-2-ene-3-carbonitrile (3l):** Brown sticky solid; 76% (59.6 mg); 1.7:1 dr. **<sup>1</sup>H NMR (600 MHz, CDCl<sub>3</sub>)** δ 7.74 (d, *J* = 7.4 Hz, 2H), 7.65 – 7.61 (m, 2H), 7.50 – 7.45 (m, 3H), 7.44 – 7.41 (m, 6H), 7.38 – 7.36 (m, 5H), 7.29 – 7.25 (m, 6H), 3.78 (dd, *J* = 11.7, 6.5 Hz, 1H), 3.68 (dd, *J* = 11.9, 6.5 Hz, 2H), 2.97 (d, *J* = 14.3 Hz, 2H), 2.68 (d, *J* = 14.7 Hz, 1H), 2.62 – 2.49 (m, 5H), 2.48 – 2.36 (m, 4H), 2.30 – 2.18 (m, 5H), 2.14 – 1.99 (m, 5H), 1.98 – 1.82 (m, 5H). **<sup>13</sup>C NMR (150 MHz, CDCl<sub>3</sub>)** δ 208.0, 207.5, 164.2, 164.0, 137.8,

137.7, 137.6, 137.5, 133.3, 133.1, 131.0, 129.9, 128.6, 128.5, 128.4, 127.7, 119.6, 119.4, 88.1, 87.5, 82.3, 82.0, 52.8, 47.6, 41.7, 41.2, 41.0, 40.7, 38.1, 37.6, 36.3, 30.9, 21.3, 20.8, 20.6. **HPLC Analysis:** 92% ee (*t*<sub>major</sub> = 13.1 min, *t*<sub>minor</sub> = 11.0 min) and 72% ee (*t*<sub>major</sub> = 19.2 min, *t*<sub>minor</sub> = 21.0 min); Chiralpak IB Column, n-Hexane/EtOH = 90/10, flow rate 1.0 mL/min, 25 °C, λ = 254 nm. **HRMS (+ESI-TOF) *m/z*:** calcd. For C<sub>23</sub>H<sub>21</sub>ClNO<sub>2</sub> [M+H]<sup>+</sup> 378.1255, found 378.1263.

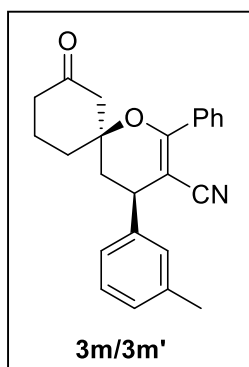

**(4R,6R)-8-oxo-2-phenyl-4-(m-tolyl)-1-oxaspiro[5.5]undec-2-ene-3-carbonitrile (3m)**: Colourless sticky solid; 73% (52.2 mg); 1.6:1 dr.  $^1\text{H}$  NMR (600 MHz,  $\text{CDCl}_3$ )  $\delta$  7.75 (d,  $J = 7.1$  Hz, 2H), 7.64 (d,  $J = 7.0$  Hz, 3H), 7.47 – 7.39 (m, 8H), 7.30 – 7.26 (m, 3H), 7.15 – 7.10 (m, 7H), 3.74 (dd,  $J = 11.7, 6.5$  Hz, 1H), 3.64 (dd,  $J = 12.0, 6.5$  Hz, 2H), 2.98 (d,  $J = 14.3$  Hz, 2H), 2.68 (d,  $J = 14.7$  Hz, 1H), 2.54 (dd,  $J = 33.5, 13.9$  Hz, 5H), 2.48 – 2.40 (m, 4H), 2.38 (s, 8H), 2.22 – 2.18 (m, 4H), 2.13 – 1.97 (m, 5H), 1.94 – 1.86 (m, 5H).  $^{13}\text{C}$  NMR (150 MHz,  $\text{CDCl}_3$ )  $\delta$  208.0, 207.5, 164.3, 164.0, 140.8, 140.7, 138.9, 133.3, 133.1, 129.1, 128.7, 128.6, 128.5, 128.4, 124.9, 124.9, 119.6, 119.4, 87.9, 87.3, 82.3, 82.0, 52.8, 47.6, 41.7, 41.2, 41.0, 40.7, 38.4, 38.0, 36.3, 30.8, 21.72, 20.8, 20.6. **HPLC Analysis**: 94% ee ( $t_{\text{major}} = 12.2$  min,  $t_{\text{minor}} = 15.4$  min) and 92% ee ( $t_{\text{major}} = 20.1$  min,  $t_{\text{minor}} = 13.3$  min); Chiralpak IB Column, n-Hexane/EtOH = 90/10, flow rate 1.0 mL/min, 25 °C,  $\lambda = 254$  nm. **HRMS (+ESI-TOF)  $m/z$** : calcd. For  $\text{C}_{23}\text{H}_{24}\text{NO}_2$   $[\text{M}+\text{H}]^+$  358.1802, found 358.1813.

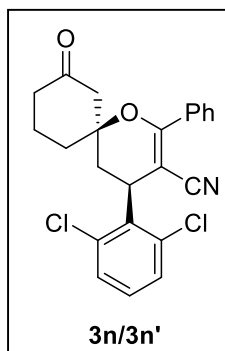

**(4S,6R)-4-(2,6-dichlorophenyl)-8-oxo-2-phenyl-1-oxaspiro[5.5]undec-2-ene-3-carbonitrile (3n)**: Off white semi solid; 65% (47.9 mg); 1.6:1 dr.  $^1\text{H}$  NMR (400 MHz,  $\text{CDCl}_3$ )  $\delta$  7.73 (d,  $J = 7.0$  Hz, 2H), 7.65 – 7.60 (m, 3H), 7.45 – 7.39 (m, 8H), 7.37 (t,  $J = 8.9$  Hz, 5H), 7.20 (t,  $J = 8.1$  Hz, 3H), 4.79 (dd,  $J = 12.2, 6.7$  Hz, 1H), 4.70 (dd,  $J = 12.2, 6.7$  Hz, 2H), 3.03 (d,  $J = 14.3$  Hz, 2H), 2.73 (d,  $J = 14.6$  Hz, 1H), 2.57 (dd,  $J = 17.6, 14.6$  Hz, 5H), 2.51 – 2.36 (m, 5H), 2.36 – 2.22 (m, 3H), 2.13 (dd,  $J = 17.5, 6.1$  Hz, 3H), 2.09 – 1.93 (m, 7H).  $^{13}\text{C}$  NMR (150 MHz,  $\text{CDCl}_3$ )  $\delta$  207.9, 207.4, 163.5, 163.5, 136.3, 136.2, 135.2, 135.1, 134.3, 134.2, 133.4, 133.1, 131.0, 130.7, 129.5, 128.9, 128.6, 128.5, 128.3, 119.0, 118.8, 86.2, 85.7, 82.2, 82.0, 52.9, 47.6, 41.0, 40.7, 36.4, 34.6, 34.3, 34.2, 33.5, 30.9, 20.8, 20.6. **HPLC Analysis**: 96% ee ( $t_{\text{major}} = 20.6$  min,  $t_{\text{minor}} = 28.2$  min) and 96% ee ( $t_{\text{major}} = 17.9$  min,  $t_{\text{minor}} = 16.1$  min); Chiralpak ID Column, n-Hexane/EtOH = 90/10, flow rate 1.0 mL/min, 25 °C,  $\lambda = 254$  nm. **HRMS (+ESI-TOF)  $m/z$** : calcd. For  $\text{C}_{23}\text{H}_{20}\text{Cl}_2\text{NO}_2$   $[\text{M}+\text{H}]^+$  412.0866, found 412.0869.

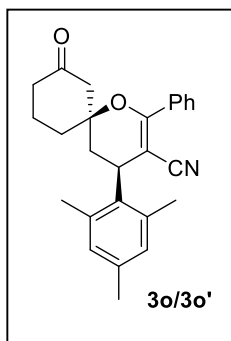

**(4R,6R)-4-mesityl-8-oxo-2-phenyl-1-oxaspiro[5.5]undec-2-ene-3-carbonitrile (3o):** Brown sticky solid; 67% (51.6 mg); 1.6:1 dr.  $^1\text{H NMR}$  (400 MHz,  $\text{CDCl}_3$ )  $\delta$  7.76 (t,  $J = 6.9$  Hz, 1H), 7.70 (d,  $J = 8.1$  Hz, 1H), 7.59 – 7.57 (m, 3H), 7.47 – 7.35 (m, 8H), 7.21 – 7.14 (m, 1H), 6.84 (s, 4H), 4.24 (dd,  $J = 11.4, 7.7$  Hz, 1H), 4.16 (dd,  $J = 12.2, 7.0$  Hz, 2H), 2.98 (d,  $J = 14.2$  Hz, 2H), 2.68 (d,  $J = 14.6$  Hz, 1H), 2.60 – 2.48 (m, 5H), 2.42 (d,  $J = 10.3$  Hz, 8H), 2.36 (d,  $J = 5.3$  Hz, 6H), 2.33 (s, 6H), 2.23 (s, 9H), 2.15 – 1.91 (m, 12H).  $^{13}\text{C NMR}$  (100 MHz,  $\text{CDCl}_3$ )  $\delta$  207.9, 207.3, 162.6, 162.4, 137.0, 136.7, 136.5, 136.4, 136.3, 133.5, 133.2, 132.5, 131.9, 131.8, 131.0, 130.9, 129.9, 129.8, 128.7, 128.3, 128.1, 128.0, 119.3, 119.1, 88.8, 88.2, 82.4, 82.0, 53.1, 48.0, 41.0, 40.7, 36.7, 36.1, 35.7, 32.9, 32.5, 31.1, 29.9, 28.4, 22.9, 21.1, 21.0, 20.9, 20.6, 20.2, 20.1. **HPLC Analysis:** 96% ee ( $t_{\text{major}} = 16.1$  min,  $t_{\text{minor}} = 10.7$  min) and 75% ee ( $t_{\text{major}} = 8.8$  min,  $t_{\text{minor}} = 11.9$  min); Chiralpak IB Column, n-Hexane/EtOH = 90/10, flow rate 1.0 mL/min, 25 °C,  $\lambda = 254$  nm. **HRMS (+ESI-TOF)**  $m/z$ : calcd. For  $\text{C}_{26}\text{H}_{28}\text{NO}_2$   $[\text{M}+\text{H}]^+$  386.2115, found 386.2114.

#### General procedure for the preparation of derivatives 4:

To a solution of compound **3a** (68.6 mg, 0.2 mmol) in EtOH (0.4 mL) was added  $\text{NaBH}_4$  (15 mg, 0.4 mmol) at 0 °C and the mixture was stirred for 5 h. The reaction mixture was diluted with DCM (3 mL), and the organic layer was washed with brine (2×2 mL). Then organic layer was dried over anhydrous sodium sulfate, and concentrated under reduced pressure. The obtained residue was purified by silica gel column chromatography using EtOAc–hexane (30–40%) as eluent to afford the compound **4**.

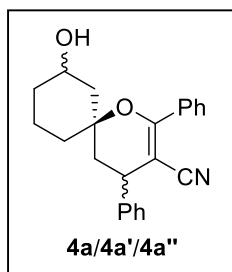

**4 (2S,3S)-5-amino-1'-benzyl-4'-(3-methoxyphenyl)-2'-oxo-3-phenyl-3H-spiro[furan-2,3'-indoline]-4-carbonitrile** was obtained as a pale yellow sticky solid in 81% yield (20.2 mg) after column chromatography.  $^1\text{H NMR}$  (400 MHz,  $\text{DMSO-d}_6$ )  $\delta$  8.02 (s, 4H), 7.67 (s, 3H), 7.40 – 7.33 (m, 10H), 7.31 – 7.22 (m, 6H), 7.19 – 7.11 (m, 4H), 7.04 (t,  $J = 3.4$  Hz, 6H), 6.95 (d,  $J = 7.0$  Hz, 3H), 6.89 (d,  $J = 8.1$  Hz, 1H), 6.73 (d,  $J = 7.8$  Hz, 1H), 6.53 – 6.48 (m, 2H), 5.23 (s, 0.8H), 4.96 (dd,  $J = 35.3, 15.6$  Hz, 2H), 4.86 (s, 1H), 4.74 (d,  $J = 16.0$  Hz, 0.8H), 4.29 (d,  $J = 16.0$  Hz, 0.8H), 3.74 (s, 6.6H).  $^{13}\text{C NMR}$  (150 MHz,  $\text{DMSO-d}_6$ )  $\delta$  174.1, 170.2, 168.2, 167.8, 158.5, 144.8, 144.1, 135.5, 135.3, 134.7, 134.4, 133.0,

132.0, 128.8, 128.7, 128.7, 128.4, 128.3, 128.1, 127.8, 127.8, 127.6, 127.4, 127.2, 127.0, 126.8, 126.5, 126.3, 125.2, 124.0, 123.8, 119.4, 119.1, 118.9, 118.7, 118.5, 115.7, 109.0, 108.9, 88.8, 88.7, 55.8, 54.8, 53.3, 51.6, 51.5, 43.3, 42.6. **HPLC Analysis:** 75% ee ( $t_{\text{major}} = 80.3$  min,  $t_{\text{minor}} = 89.8$  min) and 38% ee ( $t_{\text{major}} = 72.5$  min,  $t_{\text{minor}} = 104.5$  min); Daicel Chiralpak IF Column, n-Hexane/ i-PrOH = 90/10, flow rate 1.0 mL/min, 25 °C,  $\lambda = 254$  nm. **FT-IR (thin film):** 3434, 2925, 2189, 1807, 1730, 1666, 1605, 1495, 1453, 1424, 1343, 1282, 1169, 1143, 1079, 1030, 863, 770, 700, 632, 580  $\text{cm}^{-1}$ ; **ESI HRMS:** calcd. For  $\text{C}_{32}\text{H}_{26}\text{N}_3\text{O}_3[\text{M}+\text{H}]^+$  500.1969, found 500.1977.

### 9. Single crystal X-ray diffraction analysis of 3f:

|                                                     |                                                                                                                          |
|-----------------------------------------------------|--------------------------------------------------------------------------------------------------------------------------|
| CCDC No.                                            | 1903384                                                                                                                  |
| Empirical formula                                   | $\text{C}_{23}\text{H}_{20}\text{BrNO}_2$                                                                                |
| Formula weight                                      | 422.30                                                                                                                   |
| Crystal habit, colour                               | block/Colourless                                                                                                         |
| Crystal size, $\text{mm}^3$                         | $0.33 \times 0.21 \times 0.11$                                                                                           |
| Temperature, $T$                                    | 296(2) K                                                                                                                 |
| Wavelength, $\lambda$ (Å)                           | 0.71073                                                                                                                  |
| Crystal system                                      | orthorhombic                                                                                                             |
| Space group                                         | ' $P 21 21 2$ '                                                                                                          |
| Unit cell dimensions                                | $a = 13.351(4)$ Å<br>$b = 25.715(7)$ Å<br>$c = 5.7490(17)$ Å<br>$\alpha = 90^\circ, \beta = 90^\circ, \gamma = 90^\circ$ |
| Volume, $V$ (Å <sup>3</sup> )                       | 1973.8(10)                                                                                                               |
| $Z$                                                 | 4                                                                                                                        |
| Calculated density, $\text{Mg} \cdot \text{m}^{-3}$ | 1.421                                                                                                                    |
| Absorption coefficient, $\mu$ ( $\text{mm}^{-1}$ )  | 2.100                                                                                                                    |
| $F(000)$                                            | 864.0                                                                                                                    |
| $\theta$ range for data collection                  | $1.584^\circ$ to $25.048^\circ$                                                                                          |
| Limiting indices                                    | $-15 \leq h \leq 15, -30 \leq k \leq 30, -6 \leq l \leq 6$                                                               |
| Reflection collected/unique                         | 3497/ 1942                                                                                                               |
| Max. and min. transmission                          | 0.595/0.794                                                                                                              |
| Refinement method                                   | 'SHELXT 2014/5 (Sheldrick, 2014)'                                                                                        |
| Data/restraints/parameters                          | 3497/0/245                                                                                                               |

|                                        |                                |
|----------------------------------------|--------------------------------|
| Goodness-of-fit on $F^2$               | 1.880                          |
| Final $R$ indices [ $I > 2\sigma(I)$ ] | $R1 = 0.1147$ , $wR2 = 0.2340$ |
| $R$ indices (all data)                 | $R1 = 0.1851$ , $wR2 = 0.2477$ |
| Ellipsoid contour % probability        | 40%                            |

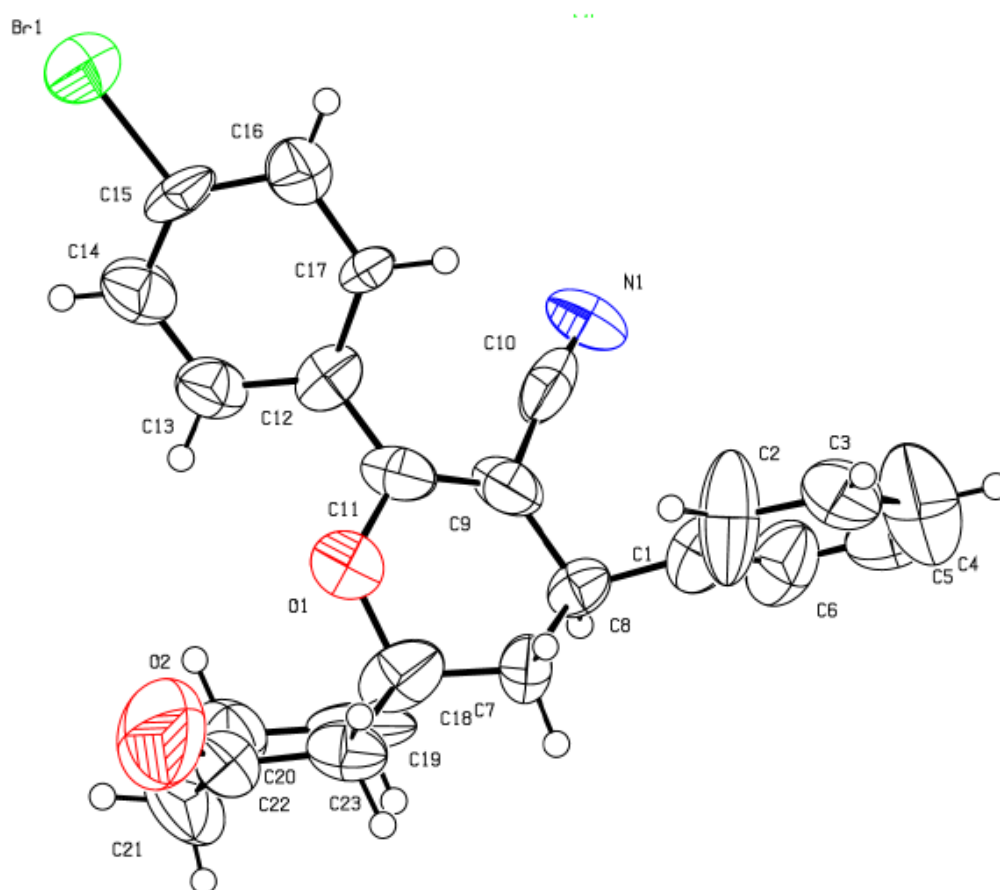

**Figure S1: 3f** (Ellipsoid contour % probability 40%)

## 10. NMR and HPLC spectra of the products:

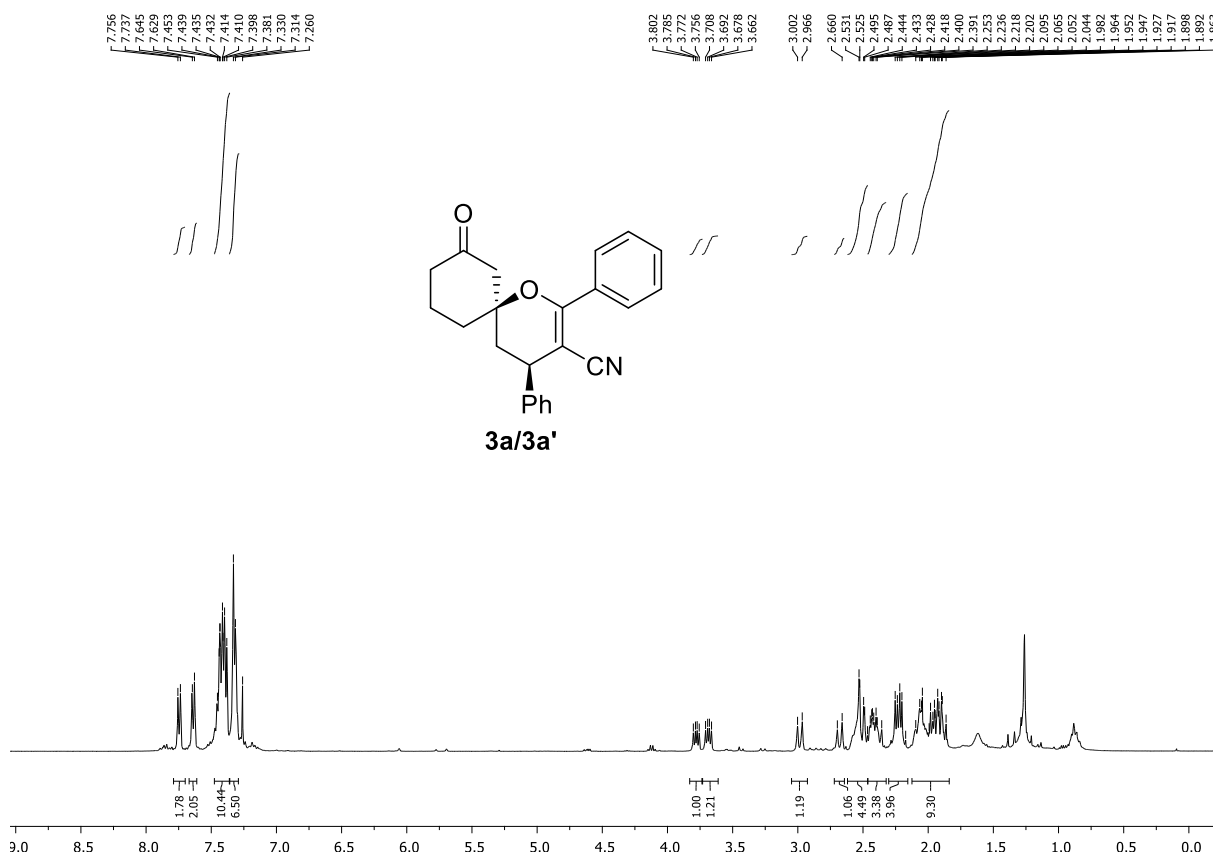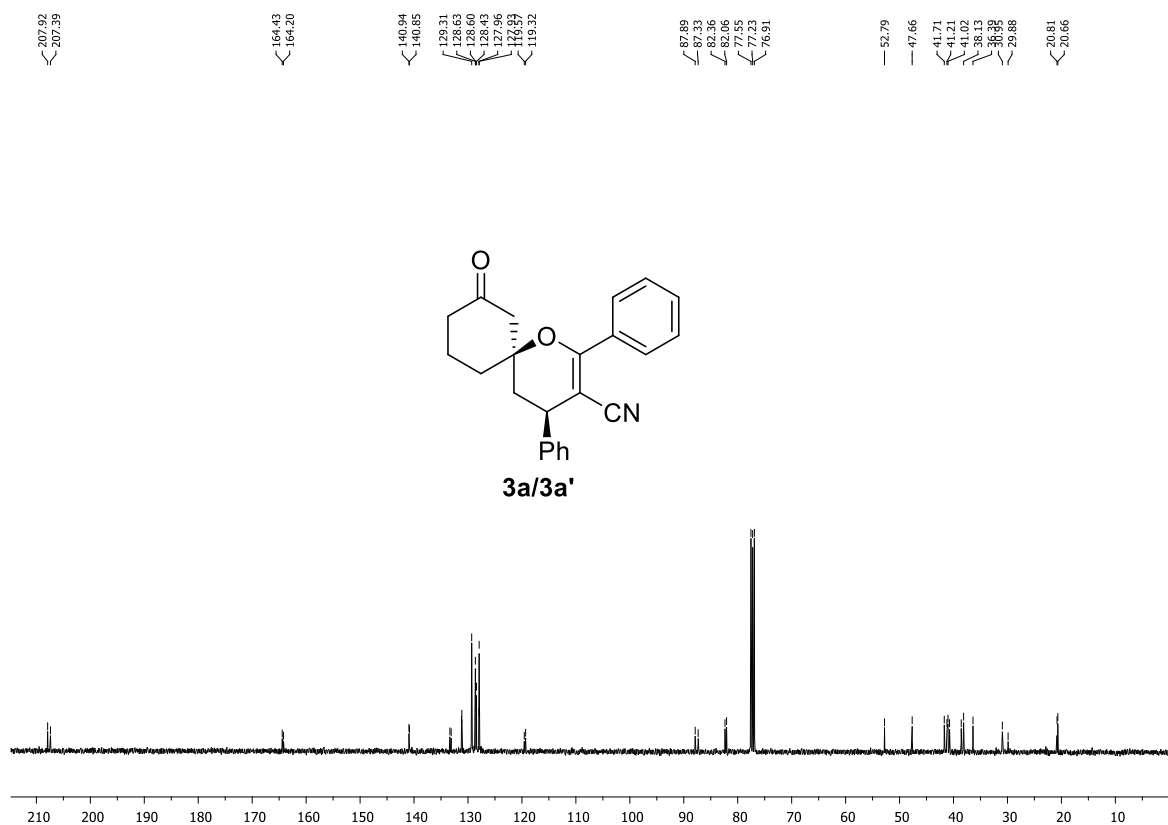

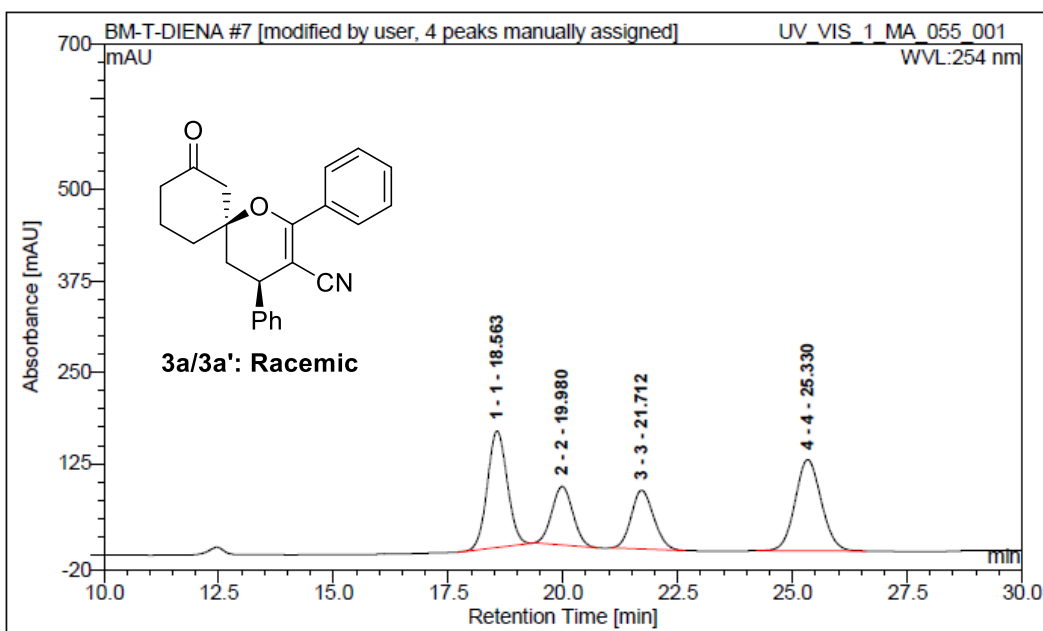

| No. | Peak Name | Ret.Time (detected) min | Area mAU*min | Rel.Area(ident.) % | Height mAU | Amount |
|-----|-----------|-------------------------|--------------|--------------------|------------|--------|
| 1   | 1         | 18.56                   | 79.80707     | 31.85835223        | 159.2174   | n.a.   |
| 2   | 2         | 19.98                   | 42.30061     | 16.88606899        | 80.04608   | n.a.   |
| 3   | 3         | 21.71                   | 45.89463     | 18.32077239        | 80.48288   | n.a.   |
| 4   | 4         | 25.33                   | 82.504       | 32.93480638        | 124.775    | n.a.   |

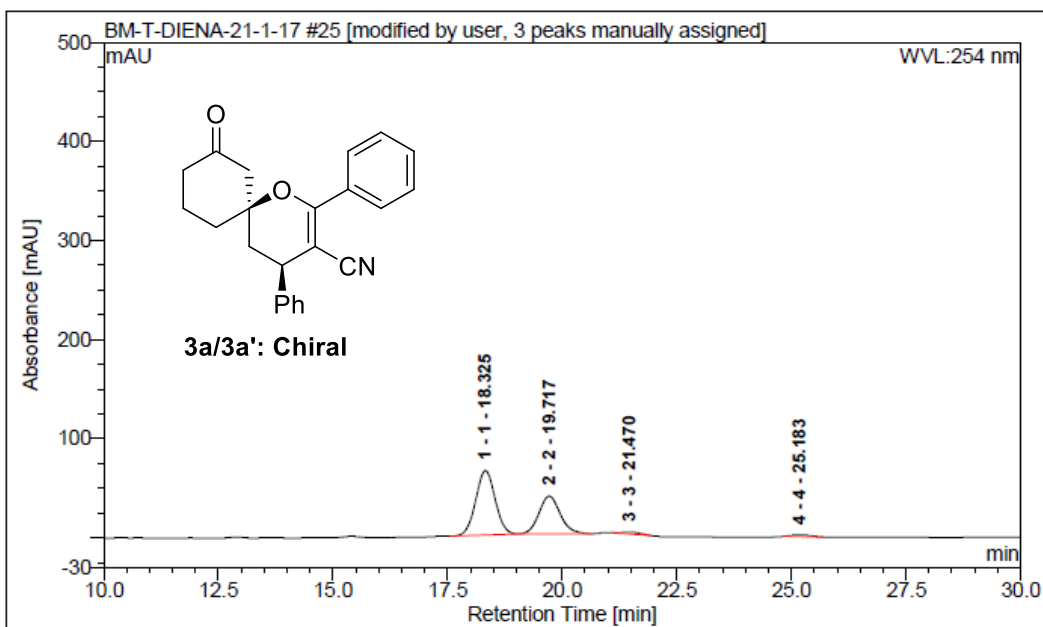

| No. | Peak Name | Ret.Time (detected) min | Area mAU*min | Rel.Area(ident.) % | Height mAU | Amount |
|-----|-----------|-------------------------|--------------|--------------------|------------|--------|
| 1   | 1         | 18.33                   | 31.75854     | 59.07482984        | 64.96074   | n.a.   |
| 2   | 2         | 19.72                   | 20.23426     | 37.63824715        | 37.97543   | n.a.   |
| 3   | 3         | 21.47                   | 0.896025     | 1.666718432        | 1.8862     | n.a.   |
| 4   | 4         | 25.18                   | 0.871        | 1.620204579        | 1.770      | n.a.   |



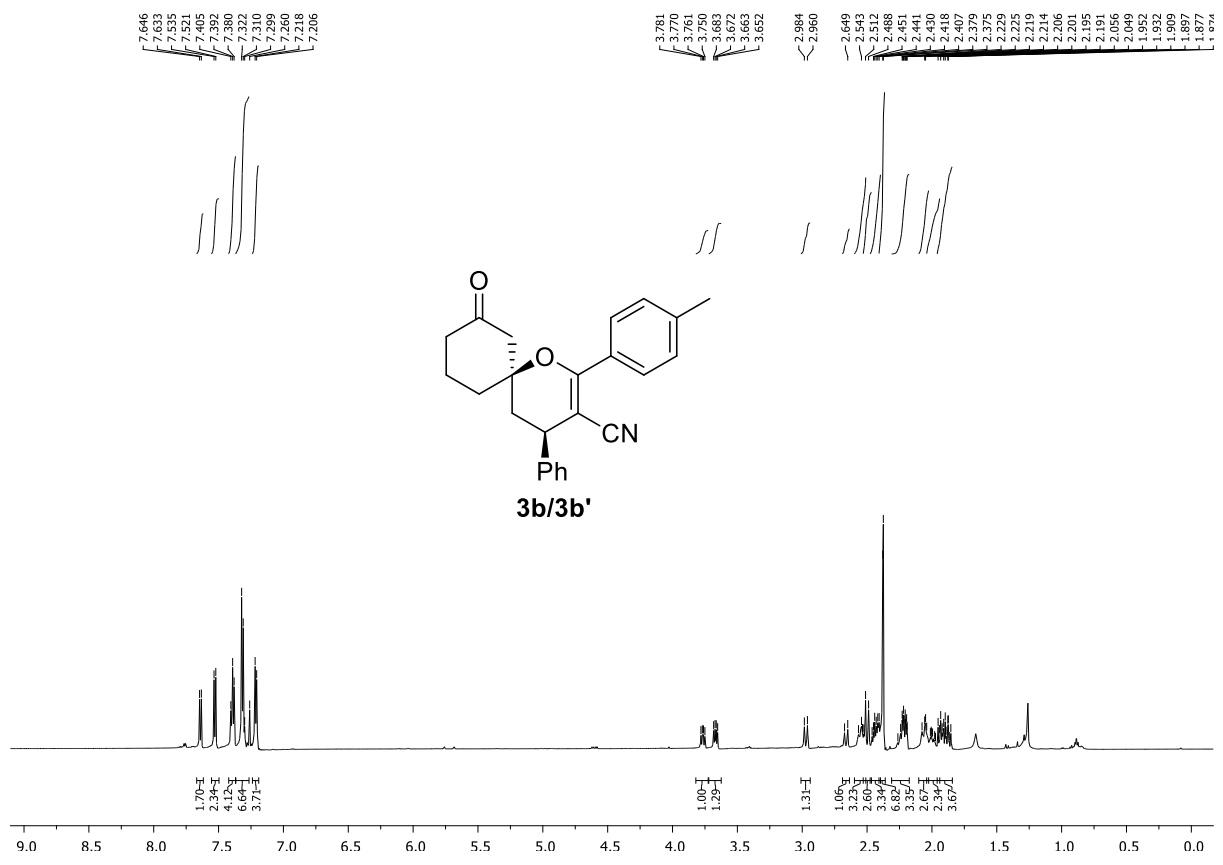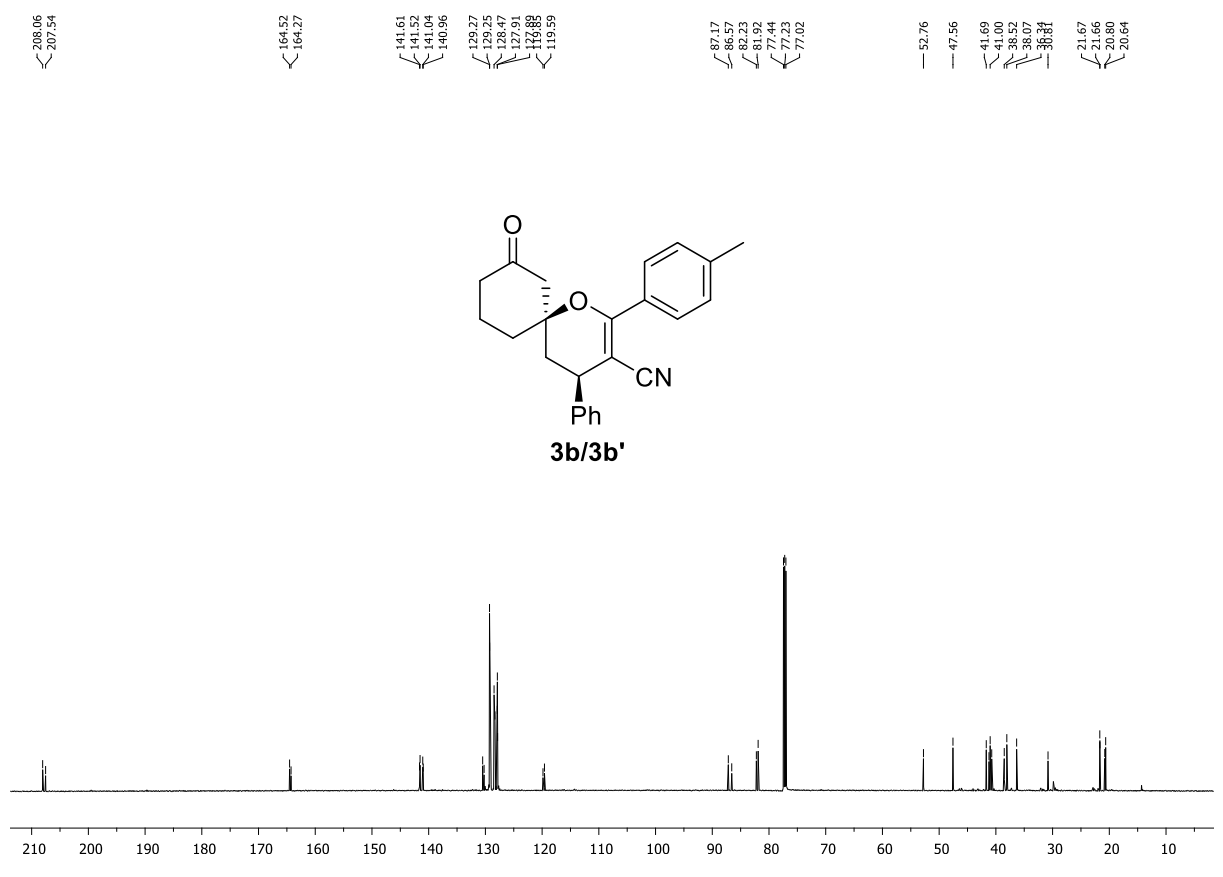

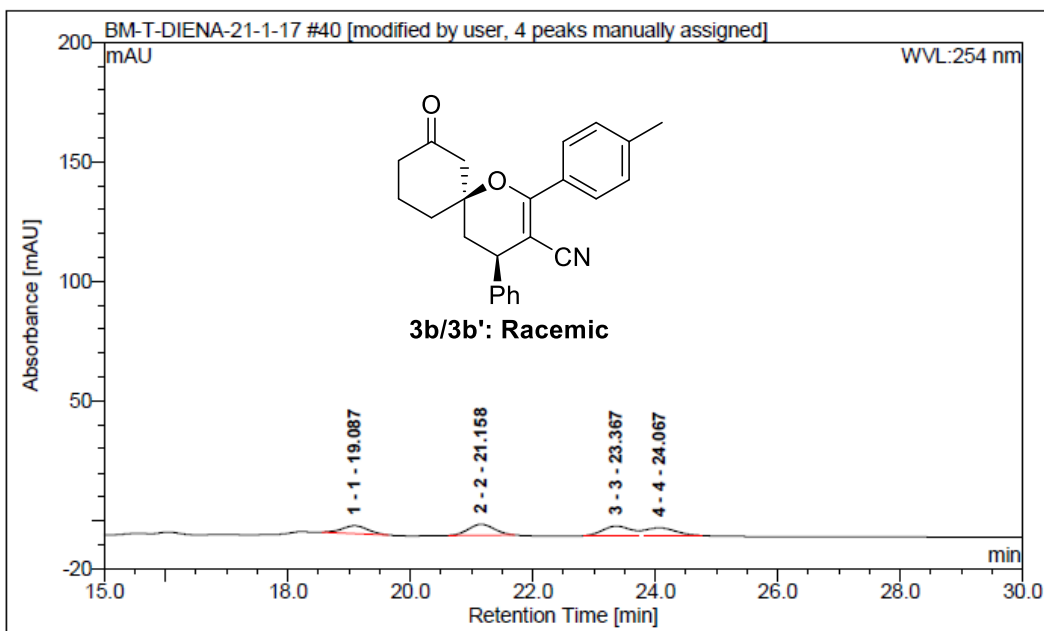

| No. | Peak Name | Ret.Time (detected) min | Area mAU*min | Rel.Area(ident.) % | Height mAU | Amount |
|-----|-----------|-------------------------|--------------|--------------------|------------|--------|
| 1   | 1         | 19.09                   | 1.594548     | 20.98952367        | 3.25383    | n.a.   |
| 2   | 2         | 21.16                   | 2.194366     | 28.88511979        | 4.53413    | n.a.   |
| 3   | 3         | 23.37                   | 2.109307     | 27.76546296        | 3.9975     | n.a.   |
| 4   | 4         | 24.07                   | 1.699        | 22.35989358        | 3.217      | n.a.   |

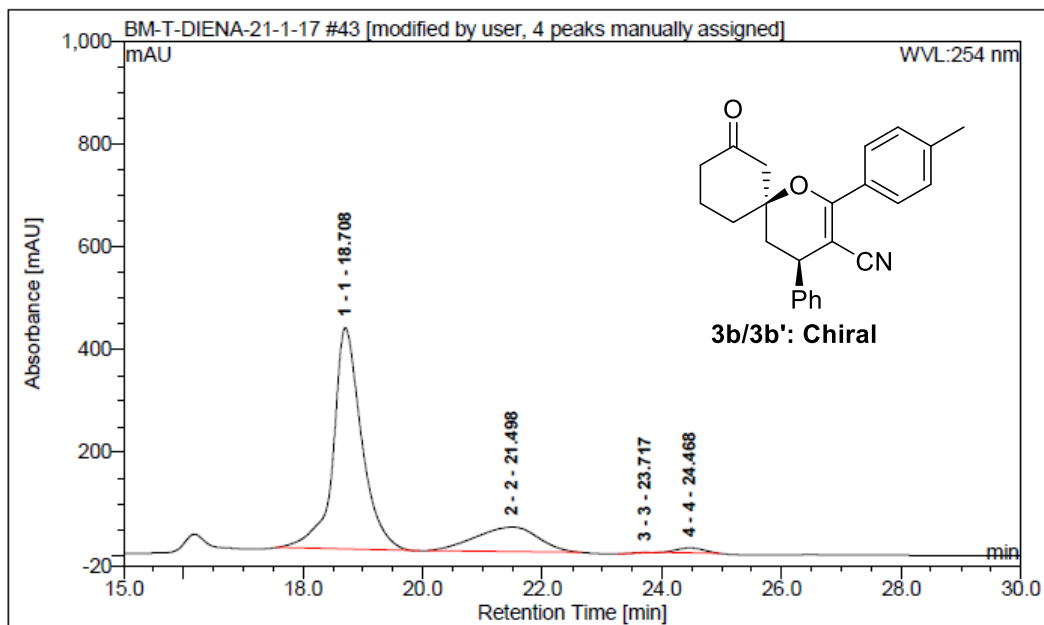

| No. | Peak Name | Ret.Time (detected) min | Area mAU*min | Rel.Area(ident.) % | Height mAU | Amount |
|-----|-----------|-------------------------|--------------|--------------------|------------|--------|
| 1   | 1         | 18.71                   | 238.59       | 78.95456024        | 430.2533   | n.a.   |
| 2   | 2         | 21.50                   | 57.90265     | 19.16123058        | 47.77032   | n.a.   |
| 3   | 3         | 23.72                   | 0.379093     | 0.1254501005       | 1.04984    | n.a.   |
| 4   | 4         | 24.47                   | 5.315        | 1.758759084        | 9.818      | n.a.   |

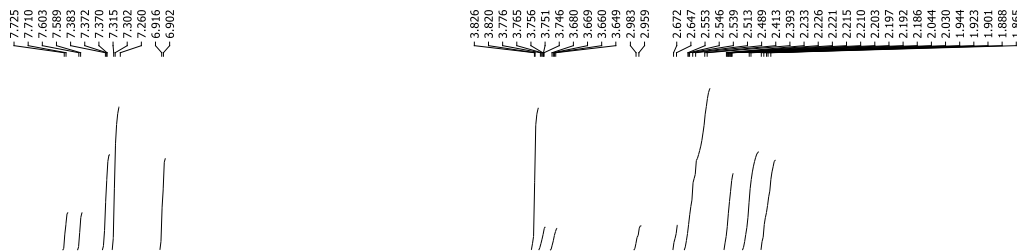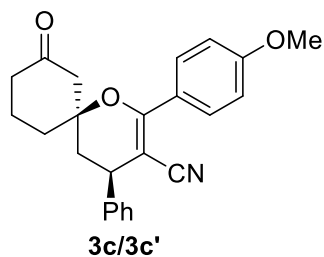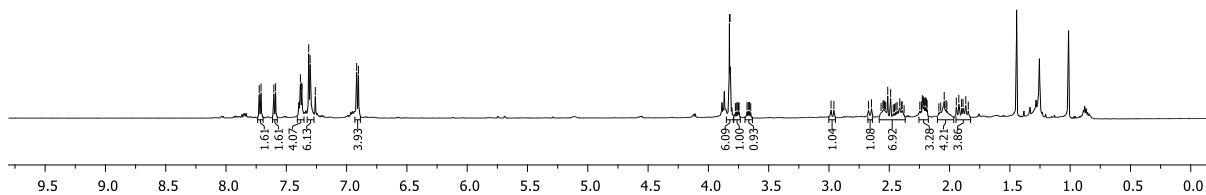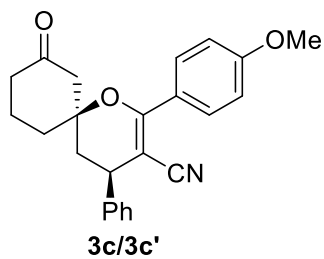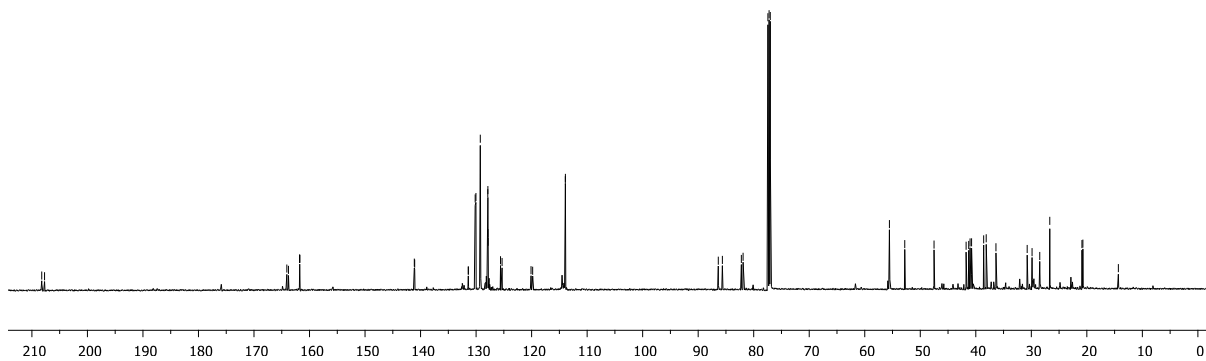

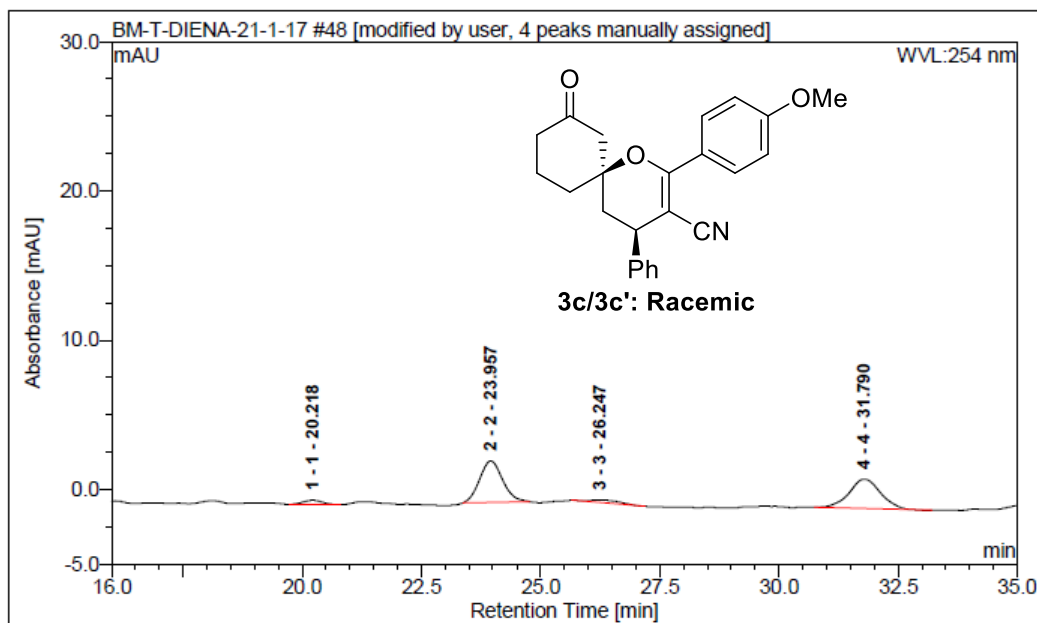

| No. | Peak Name | Ret.Time (detected) min | Area mAU*min | Rel.Area(ident.) % | Height mAU | Amount |
|-----|-----------|-------------------------|--------------|--------------------|------------|--------|
| 1   | 1         | 20.22                   | 0.133987     | 4.024644474        | 0.28853    | n.a.   |
| 2   | 2         | 23.96                   | 1.547447     | 46.48156988        | 2.76799    | n.a.   |
| 3   | 3         | 26.25                   | 0.139169     | 4.180310237        | 0.18291    | n.a.   |
| 4   | 4         | 31.79                   | 1.509        | 45.31347541        | 1.969      | n.a.   |

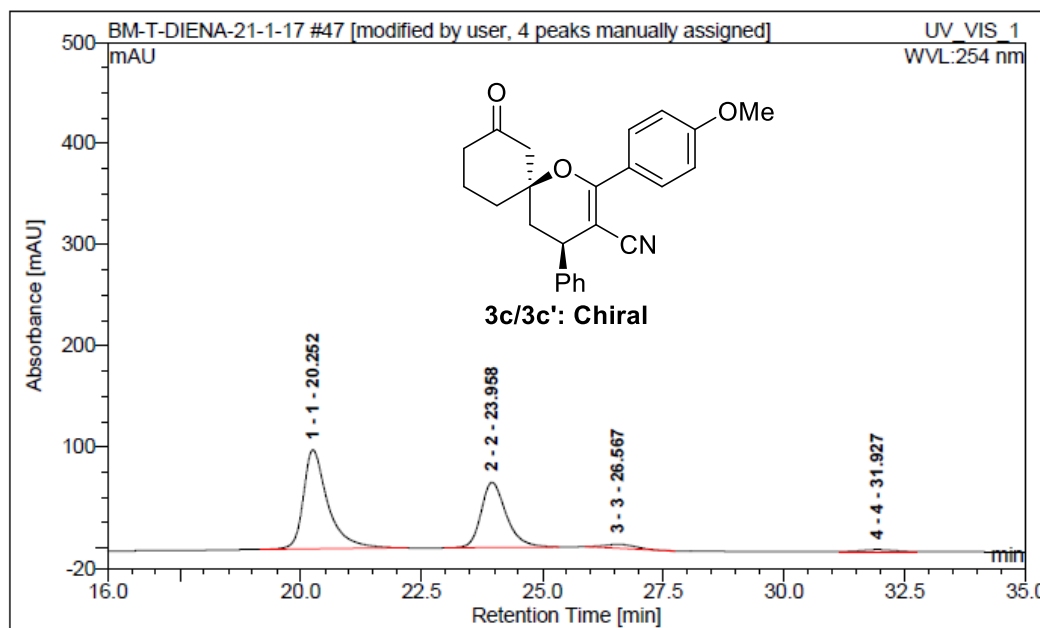

| No. | Peak Name | Ret.Time (detected) min | Area mAU*min | Rel.Area(ident.) % | Height mAU | Amount |
|-----|-----------|-------------------------|--------------|--------------------|------------|--------|
| 1   | 1         | 20.25                   | 57.7782      | 57.11346864        | 97.95073   | n.a.   |
| 2   | 2         | 23.96                   | 39.06872     | 38.61924118        | 64.50036   | n.a.   |
| 3   | 3         | 26.57                   | 2.906363     | 2.872925355        | 3.91606    | n.a.   |
| 4   | 4         | 31.93                   | 1.411        | 1.394364821        | 1.912      | n.a.   |

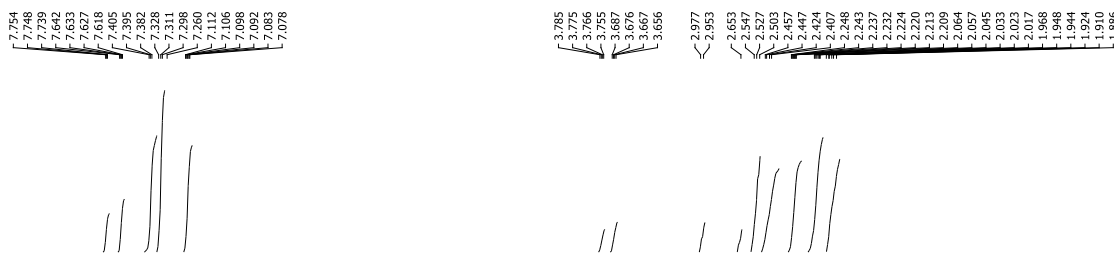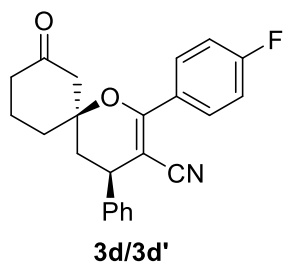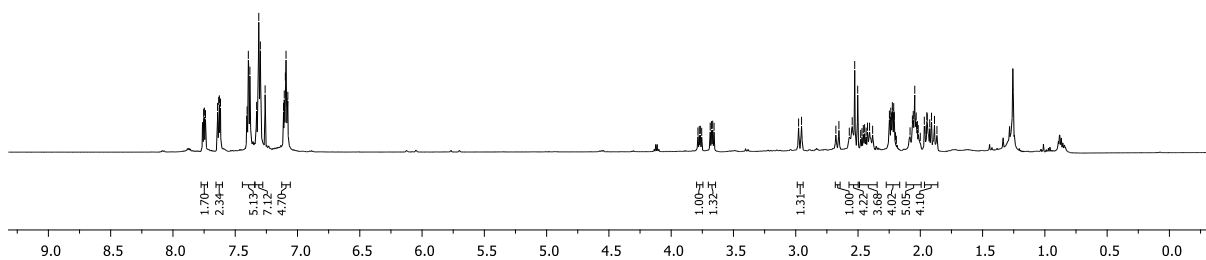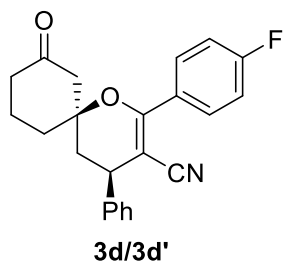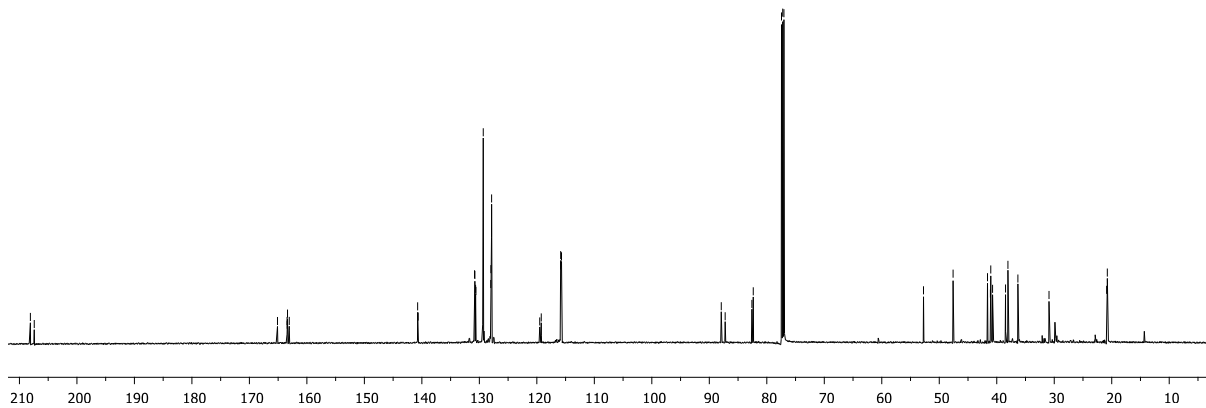

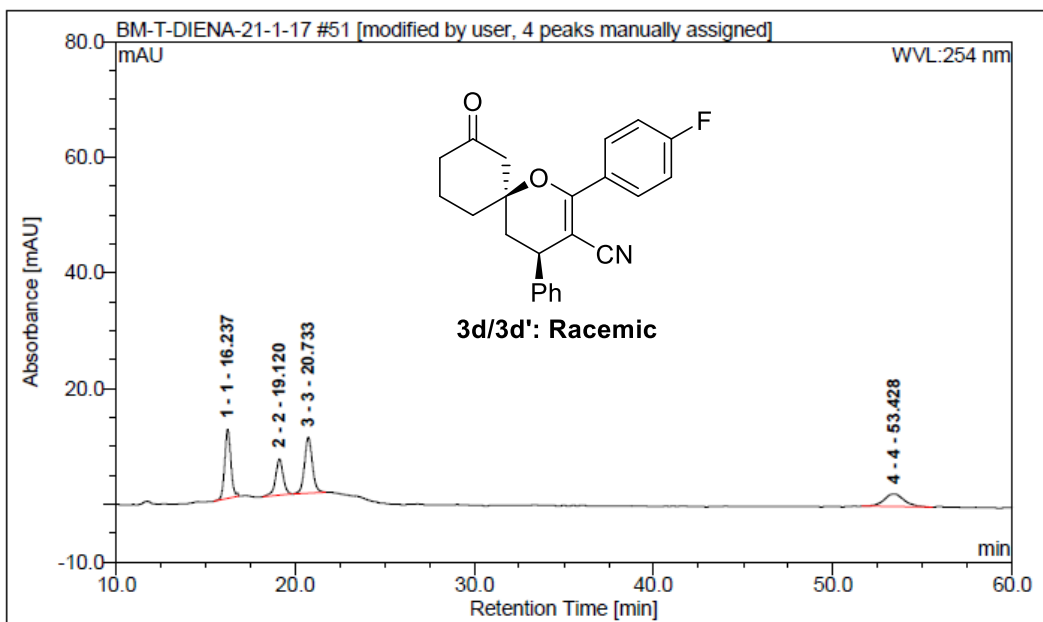

| No. | Peak Name | Ret.Time (detected) min | Area mAU*min | Rel.Area(ident.) % | Height mAU | Amount |
|-----|-----------|-------------------------|--------------|--------------------|------------|--------|
| 1 1 |           | 16.24                   | 4.730537     | 30.52604994        | 11.92859   | n.a.   |
| 2 2 |           | 19.12                   | 3.047447     | 19.66510646        | 6.21168    | n.a.   |
| 3 3 |           | 20.73                   | 4.897125     | 31.60103996        | 9.6538     | n.a.   |
| 4 4 |           | 53.43                   | 2.822        | 18.20780364        | 2.217      | n.a.   |

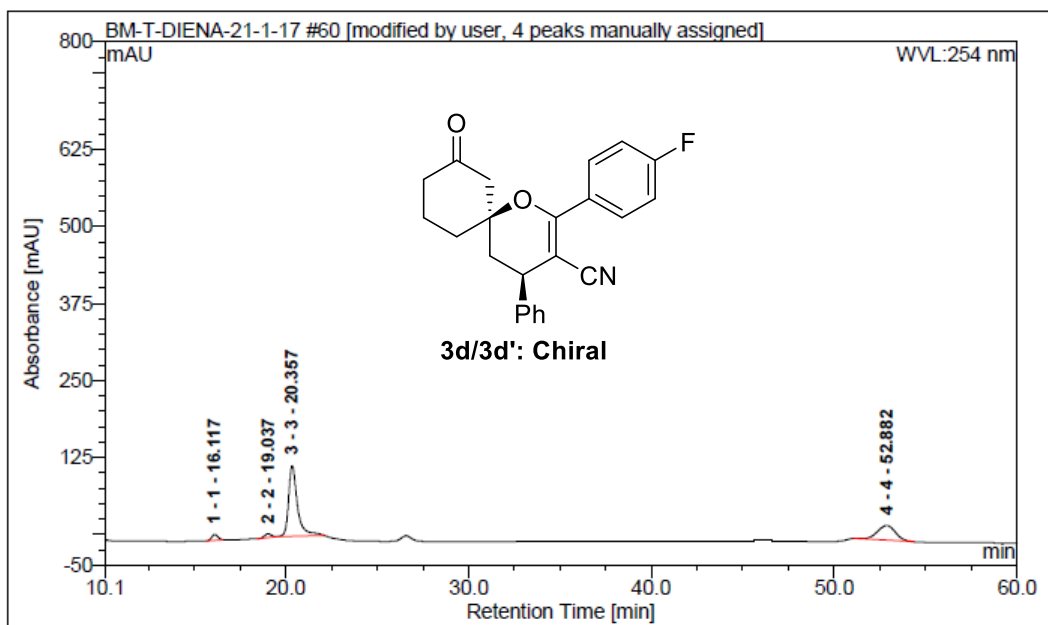

| No. | Peak Name | Ret.Time (detected) min | Area mAU*min | Rel.Area(ident.) % | Height mAU | Amount |
|-----|-----------|-------------------------|--------------|--------------------|------------|--------|
| 1 1 |           | 16.12                   | 3.610299     | 3.66302283         | 9.66627    | n.a.   |
| 2 2 |           | 19.04                   | 2.520483     | 2.557291498        | 6.04261    | n.a.   |
| 3 3 |           | 20.36                   | 65.03682     | 65.98661086        | 114.5663   | n.a.   |
| 4 4 |           | 52.88                   | 27.393       | 27.79307481        | 24.041     | n.a.   |

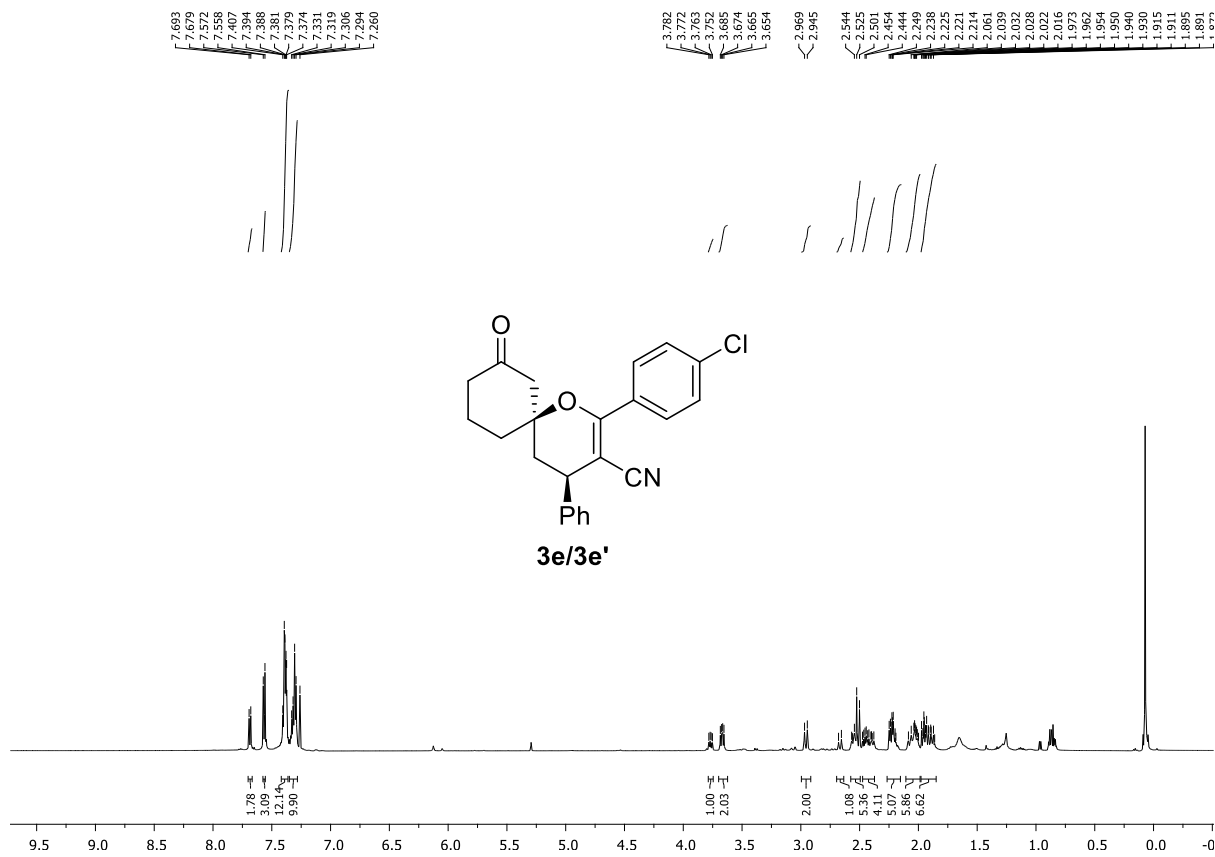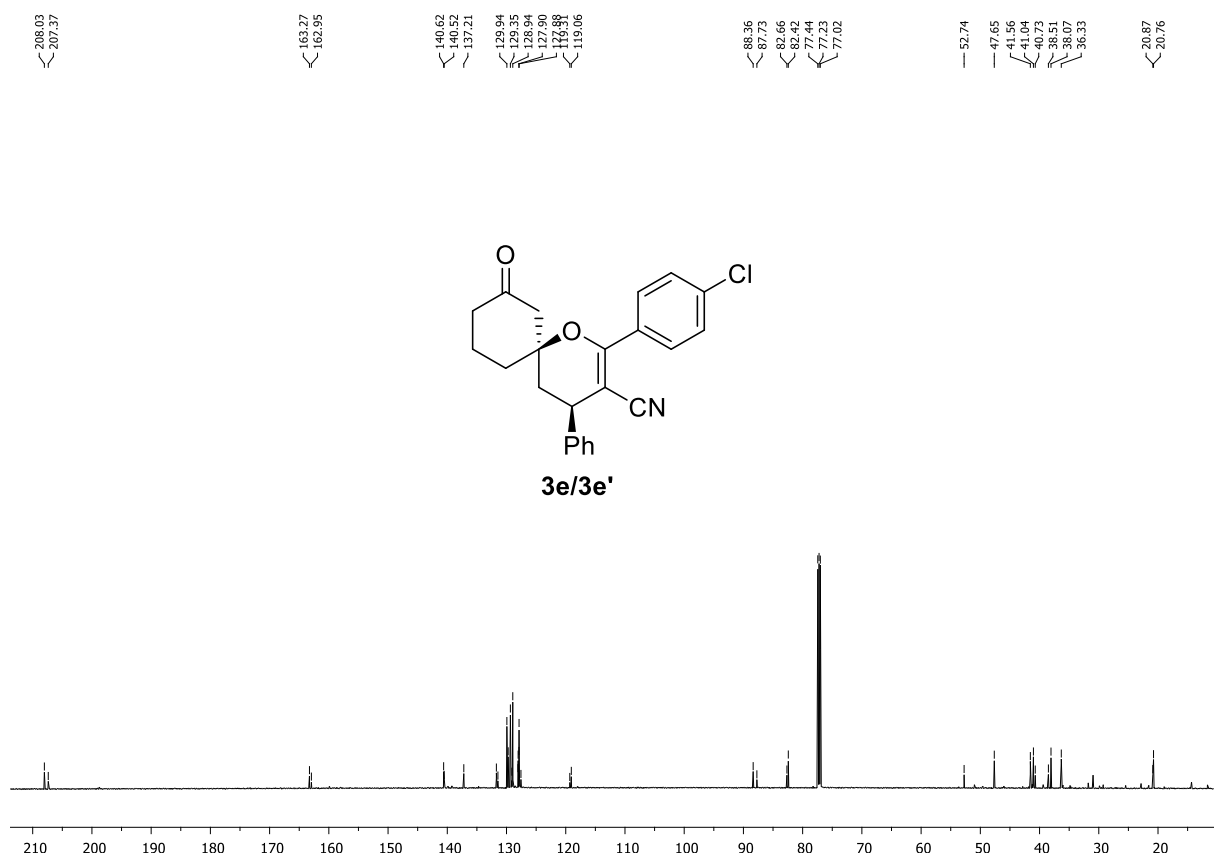

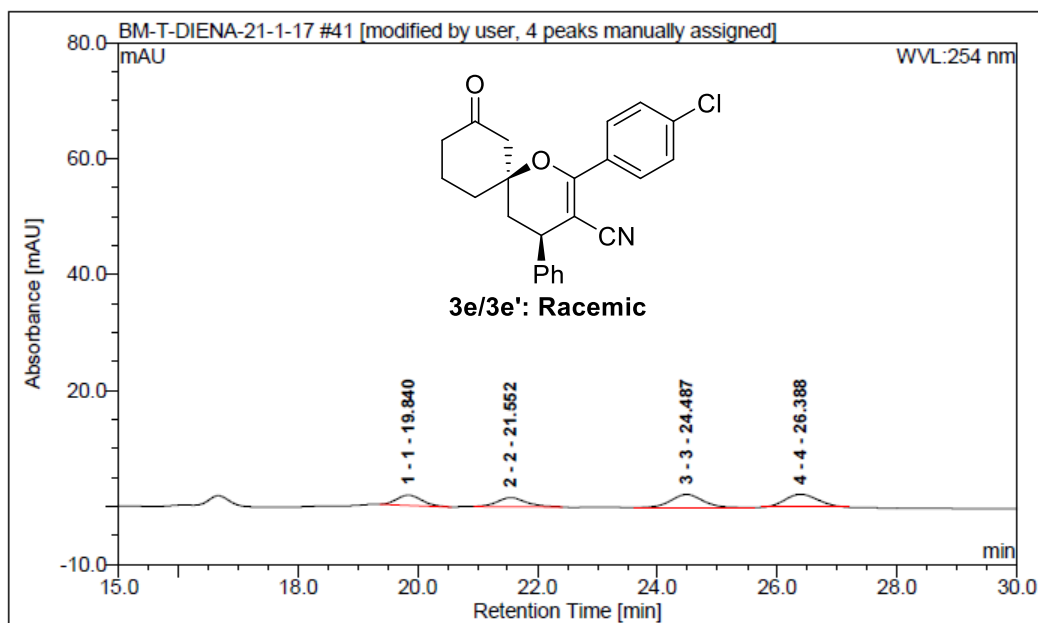

| No. | Peak Name | Ret.Time (detected) min | Area mAU*min | Rel.Area(ident.) % | Height mAU | Amount |
|-----|-----------|-------------------------|--------------|--------------------|------------|--------|
| 1 1 |           | 19.84                   | 0.844403     | 18.418576          | 1.75928    | n.a.   |
| 2 2 |           | 21.55                   | 0.876887     | 19.12712469        | 1.5579     | n.a.   |
| 3 3 |           | 24.49                   | 1.407942     | 30.71078792        | 2.28438    | n.a.   |
| 4 4 |           | 26.39                   | 1.455        | 31.74351139        | 2.254      | n.a.   |

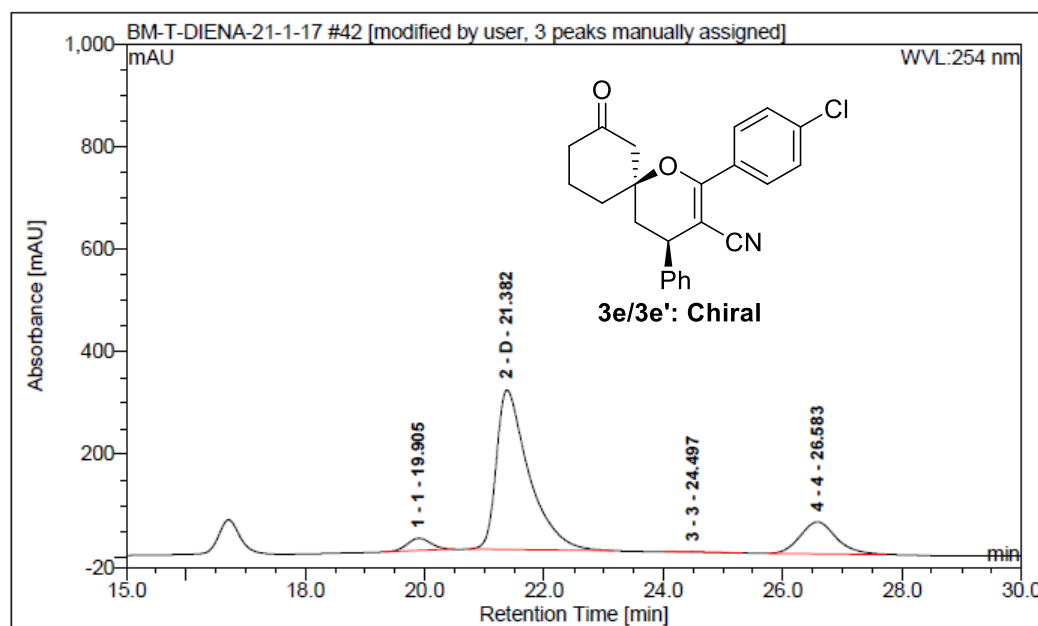

| No. | Peak Name | Ret.Time (detected) min | Area mAU*min | Rel.Area(ident.) % | Height mAU | Amount |
|-----|-----------|-------------------------|--------------|--------------------|------------|--------|
| 1 1 |           | 19.91                   | 11.11645     | 4.439502408        | 24.00413   | n.a.   |
| 2 D |           | 21.38                   | 195.4689     | 78.06310958        | 310.6909   | n.a.   |
| 3 3 |           | 24.50                   | 0.585916     | 0.2339932695       | 0.9088     | n.a.   |
| 4 4 |           | 26.58                   | 43.227       | 17.26339474        | 61.858     | n.a.   |



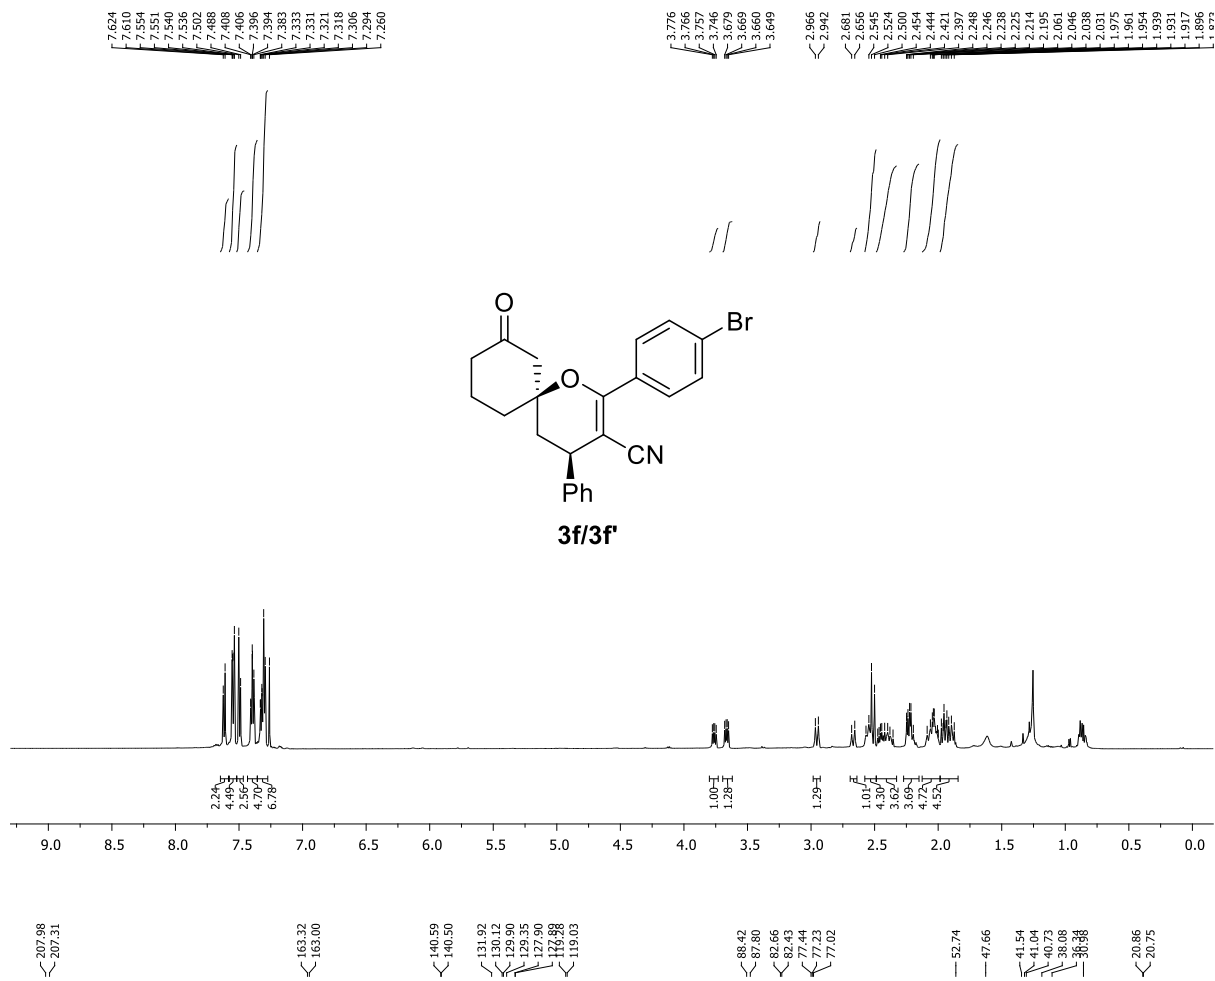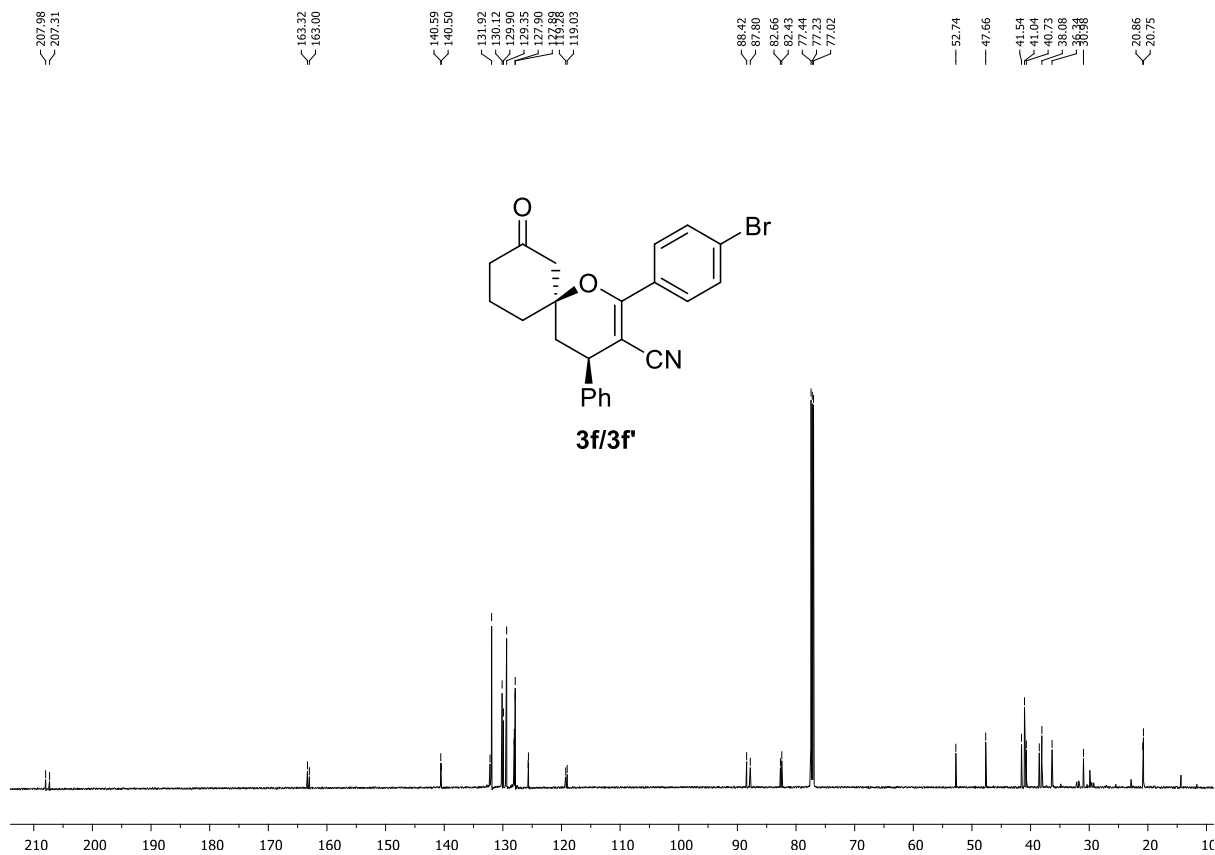

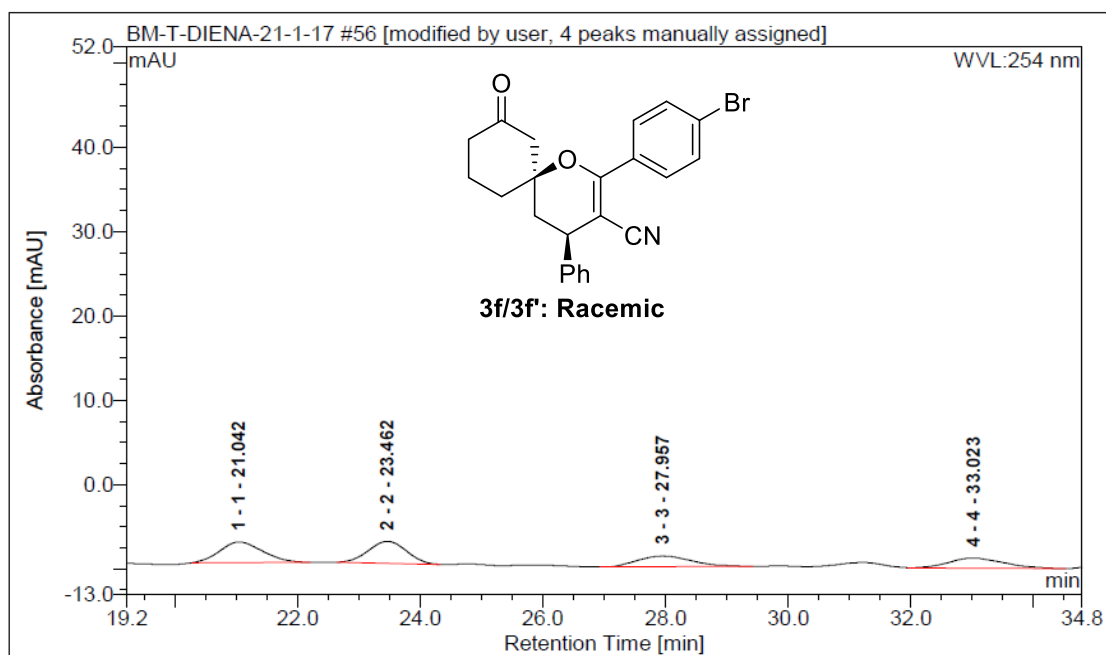

| No. | Peak Name | Ret.Time (detected) min | Area mAU*min | Rel.Area(ident.) % | Height mAU | Amount |
|-----|-----------|-------------------------|--------------|--------------------|------------|--------|
| 1   | 1         | 21.04                   | 1.978355     | 30.93613704        | 2.45506    | n.a.   |
| 2   | 2         | 23.46                   | 1.8735       | 29.2964819         | 2.60797    | n.a.   |
| 3   | 3         | 27.96                   | 1.308113     | 20.45535746        | 1.25731    | n.a.   |
| 4   | 4         | 33.02                   | 1.235        | 19.3120236         | 1.207      | n.a.   |

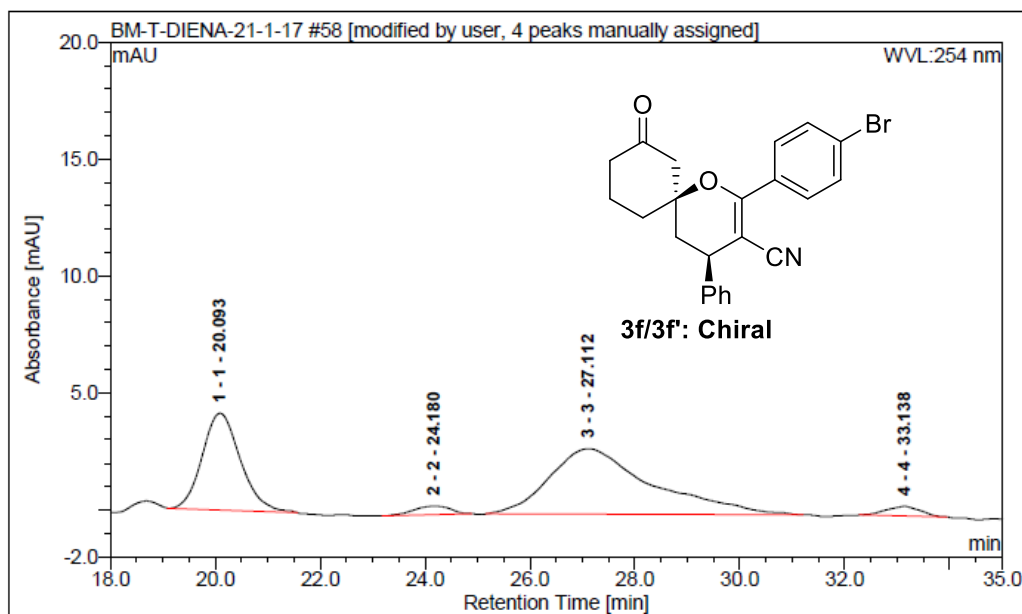

| No. | Peak Name | Ret.Time (detected) min | Area mAU*min | Rel.Area(ident.) % | Height mAU | Amount |
|-----|-----------|-------------------------|--------------|--------------------|------------|--------|
| 1   | 1         | 20.09                   | 3.490626     | 33.56171739        | 4.13584    | n.a.   |
| 2   | 2         | 24.18                   | 0.299419     | 2.878860434        | 0.36728    | n.a.   |
| 3   | 3         | 27.11                   | 6.300948     | 60.58245081        | 2.79609    | n.a.   |
| 4   | 4         | 33.14                   | 0.310        | 2.976971365        | 0.412      | n.a.   |

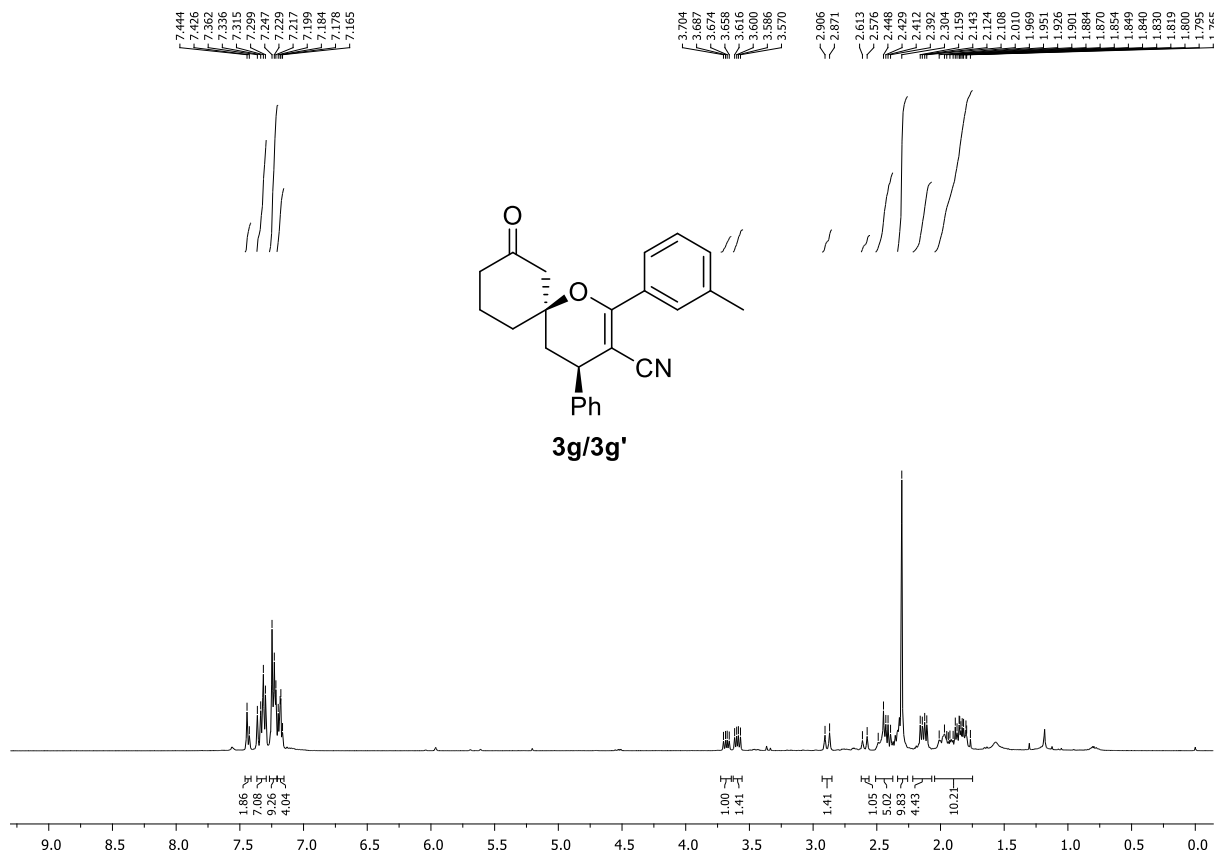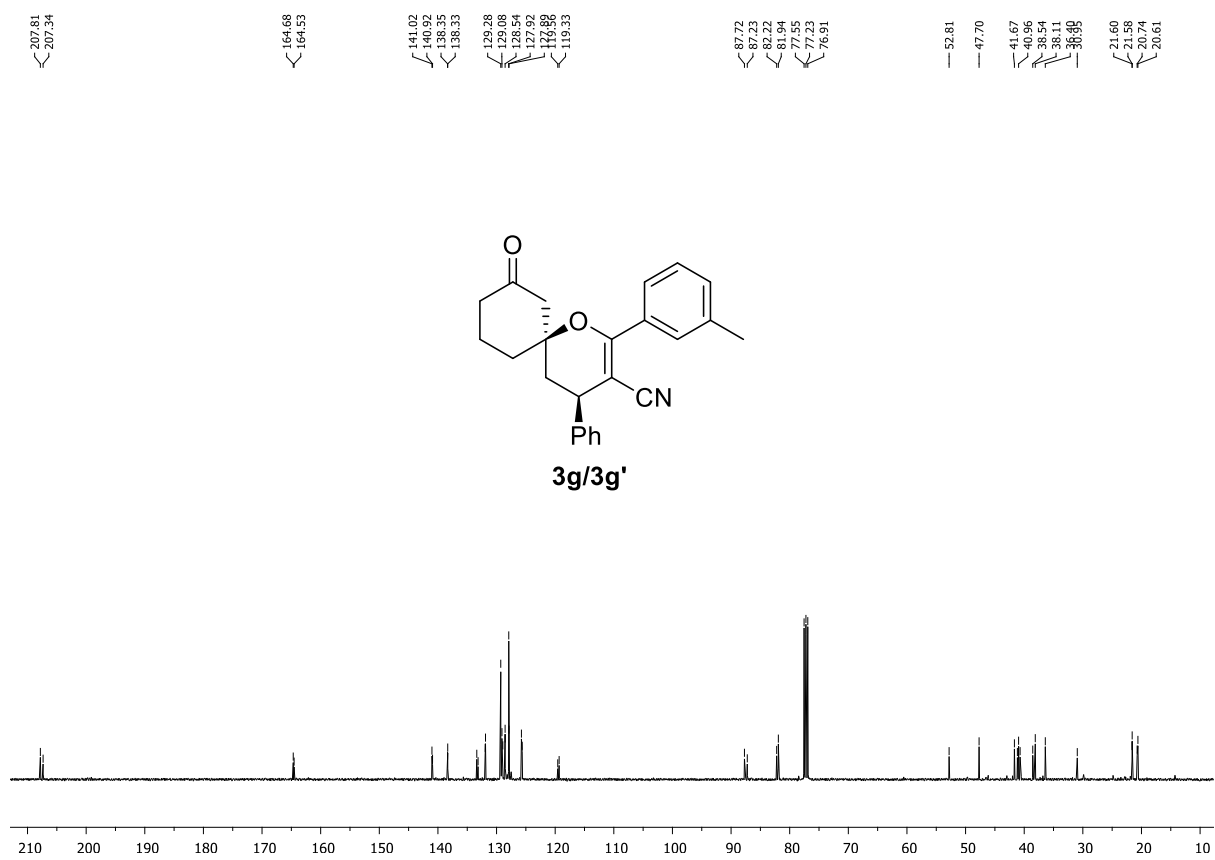

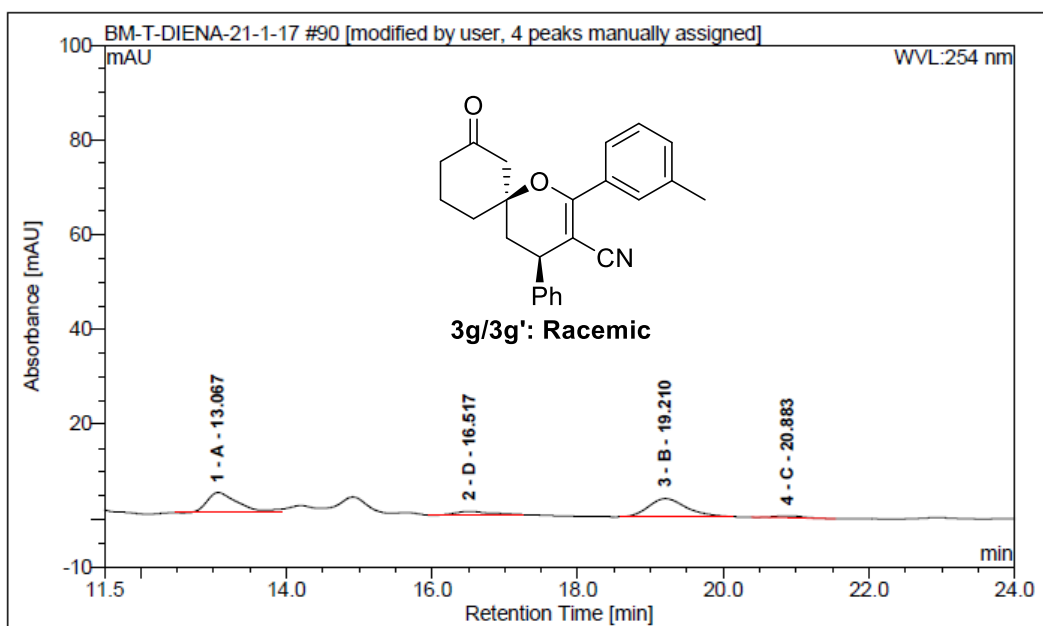

| No. | Peak Name | Ret.Time (detected)<br>min | Area<br>mAU*min | Rel.Area(ident.)<br>% | Height<br>mAU | Amount |
|-----|-----------|----------------------------|-----------------|-----------------------|---------------|--------|
| 1   | A         | 13.07                      | 2.232972        | 43.54985386           | 4.29258       | n.a.   |
| 2   | D         | 16.52                      | 0.395131        | 7.70626974            | 0.74232       | n.a.   |
| 3   | B         | 19.21                      | 2.293397        | 44.72831933           | 3.81331       | n.a.   |
| 4   | C         | 20.88                      | 0.206           | 4.015557074           | 0.461         | n.a.   |

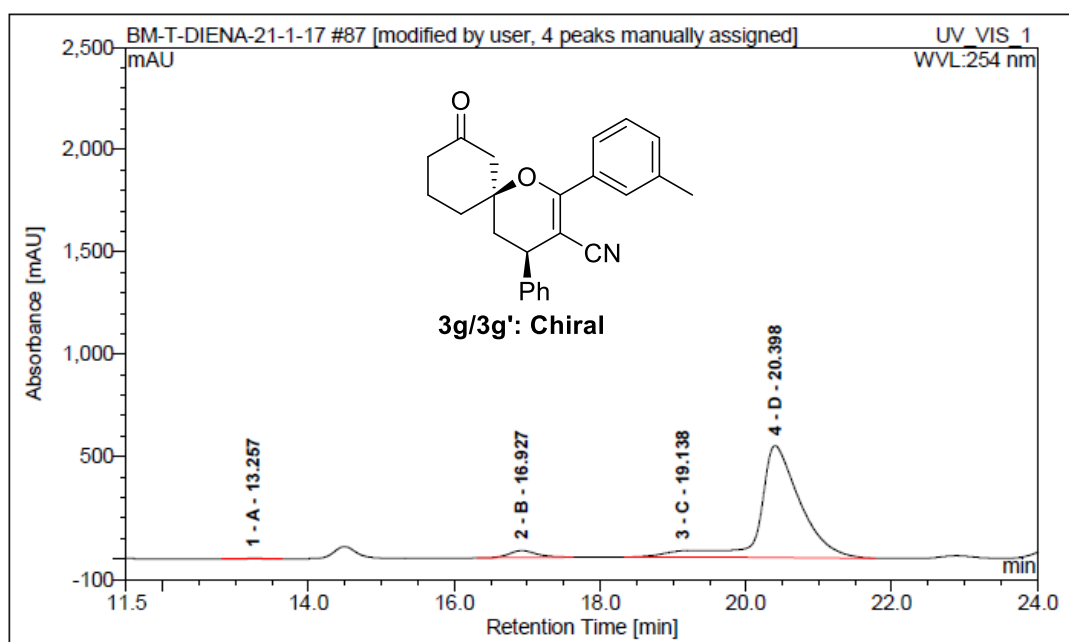

| No. | Peak Name | Ret.Time (detected)<br>min | Area<br>mAU*min | Rel.Area(ident.)<br>% | Height<br>mAU | Amount |
|-----|-----------|----------------------------|-----------------|-----------------------|---------------|--------|
| 1   | A         | 13.26                      | 0.424038        | 0.1143335297          | 1.07083       | n.a.   |
| 2   | B         | 16.93                      | 15.16459        | 4.08883479            | 34.24916      | n.a.   |
| 3   | C         | 19.14                      | 36.71143        | 9.898517967           | 31.87549      | n.a.   |
| 4   | D         | 20.40                      | 318.578         | 85.89831371           | 546.521       | n.a.   |

7.863  
7.791  
7.760  
7.645  
7.626  
7.503  
7.495  
7.483  
7.476  
7.466  
7.456  
7.347  
7.330  
7.326  
7.311  
7.269  
7.246  
7.242  
7.235  
7.184

3.728  
3.712  
3.699  
3.683  
3.668  
3.652  
3.635  
3.603  
2.906  
2.879  
2.853  
2.816  
2.493  
2.467  
2.458  
2.430  
2.396  
2.382  
2.365  
2.332  
2.318  
2.204  
2.187  
2.168  
2.152  
2.004  
1.980  
1.868  
1.847  
1.832  
1.910  
1.902  
1.887  
1.876  
1.867  
1.852  
1.847  
1.831  
1.811

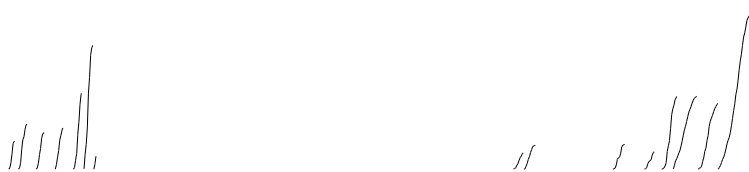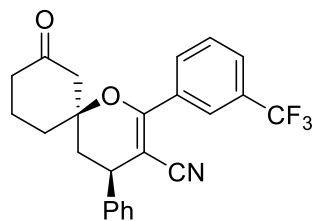

3h/3h'

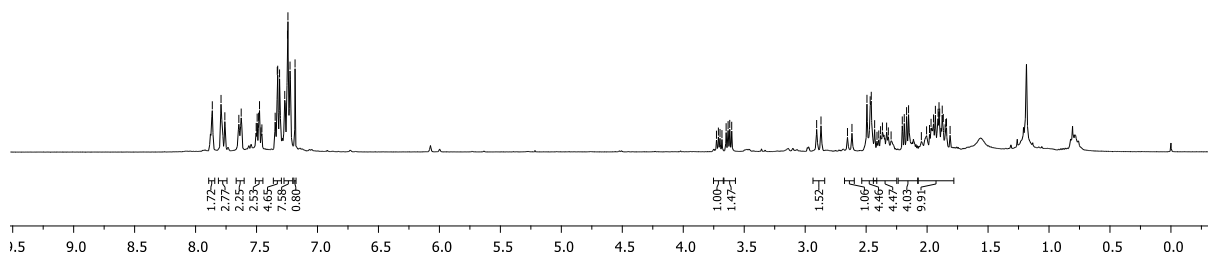

207.59  
206.96

162.78  
162.65

140.42  
140.30  
134.21  
131.94  
128.42  
128.33  
128.17  
128.14  
118.78  
118.56

89.38  
88.92  
82.82  
82.65  
77.23  
76.91

52.81  
47.86  
41.40  
40.93  
38.48  
38.12  
37.19  
29.90  
20.75  
20.72

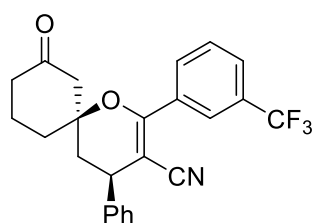

3h/3h'

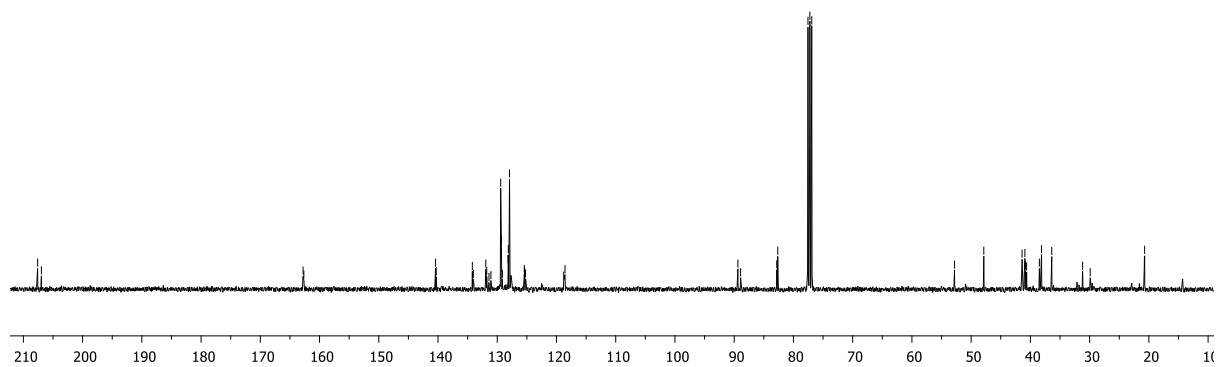

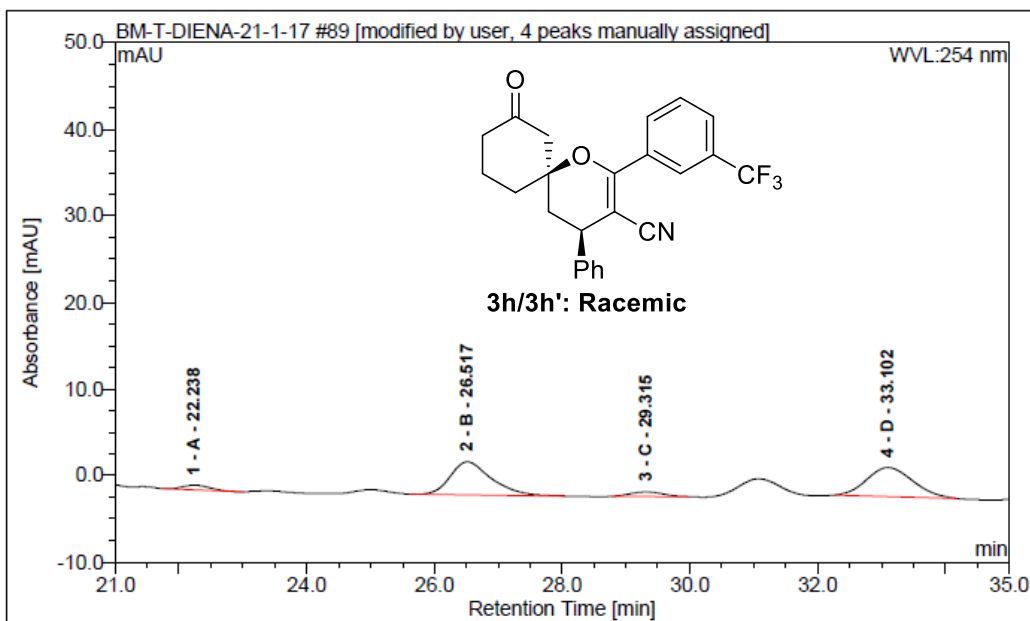

| No. | Peak Name | Ret.Time (detected)<br>min | Area<br>mAU*min | Rel.Area(ident.)<br>% | Height<br>mAU | Amount |
|-----|-----------|----------------------------|-----------------|-----------------------|---------------|--------|
| 1 A |           | 22.24                      | 0.251598        | 4.06036797            | 0.52667       | n.a.   |
| 2 B |           | 26.52                      | 2.834386        | 45.74221754           | 3.81369       | n.a.   |
| 3 C |           | 29.32                      | 0.300653        | 4.852040259           | 0.50706       | n.a.   |
| 4 D |           | 33.10                      | 2.810           | 45.34537423           | 3.350         | n.a.   |

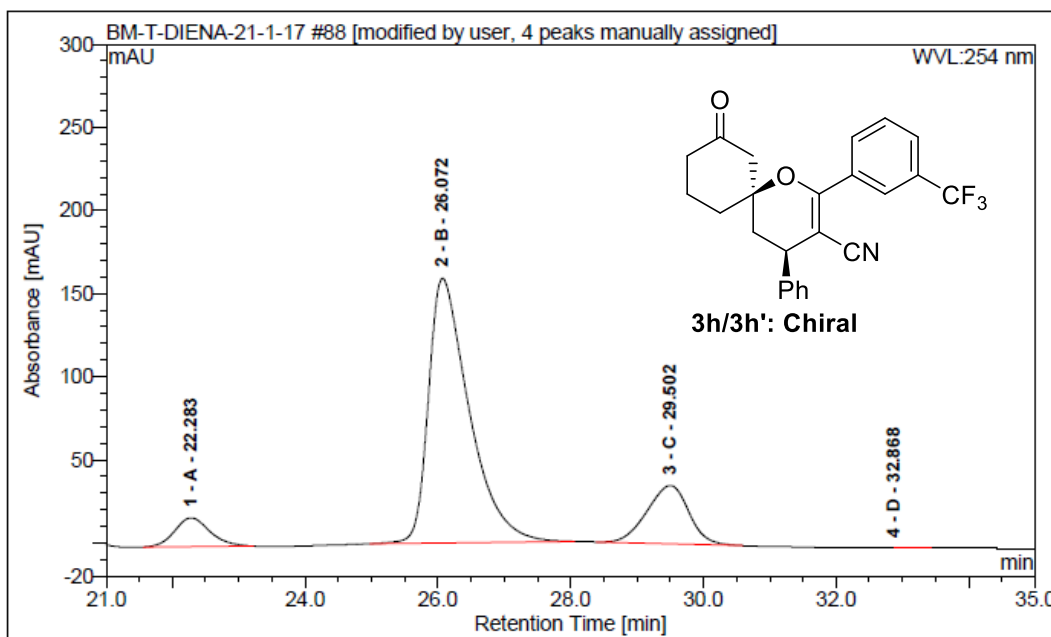

| No. | Peak Name | Ret.Time (detected)<br>min | Area<br>mAU*min | Rel.Area(ident.)<br>% | Height<br>mAU | Amount |
|-----|-----------|----------------------------|-----------------|-----------------------|---------------|--------|
| 1 A |           | 22.28                      | 10.69295        | 7.163362427           | 17.32086      | n.a.   |
| 2 B |           | 26.07                      | 112.9136        | 75.64240365           | 159.196       | n.a.   |
| 3 C |           | 29.50                      | 25.66111        | 17.19074369           | 35.08944      | n.a.   |
| 4 D |           | 32.87                      | 0.005           | 0.003490231114        | 0.000         | n.a.   |

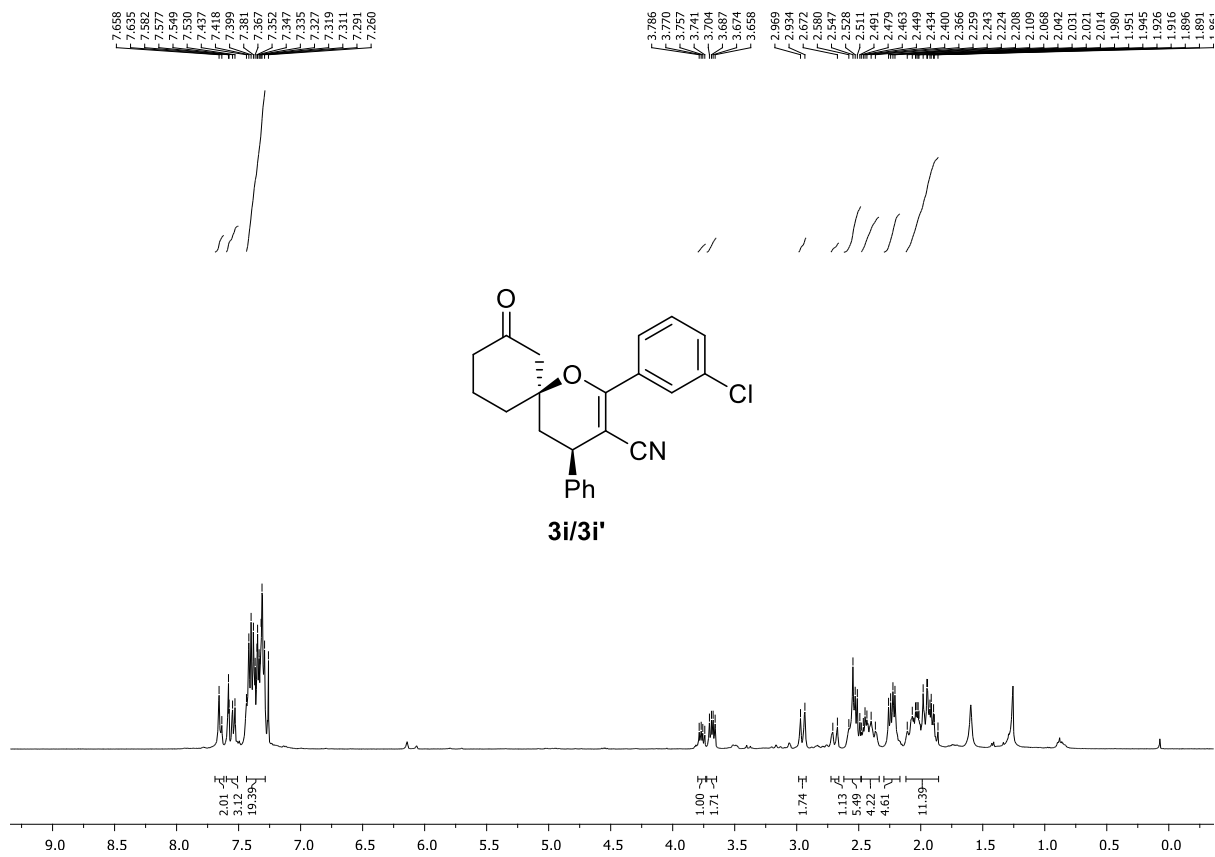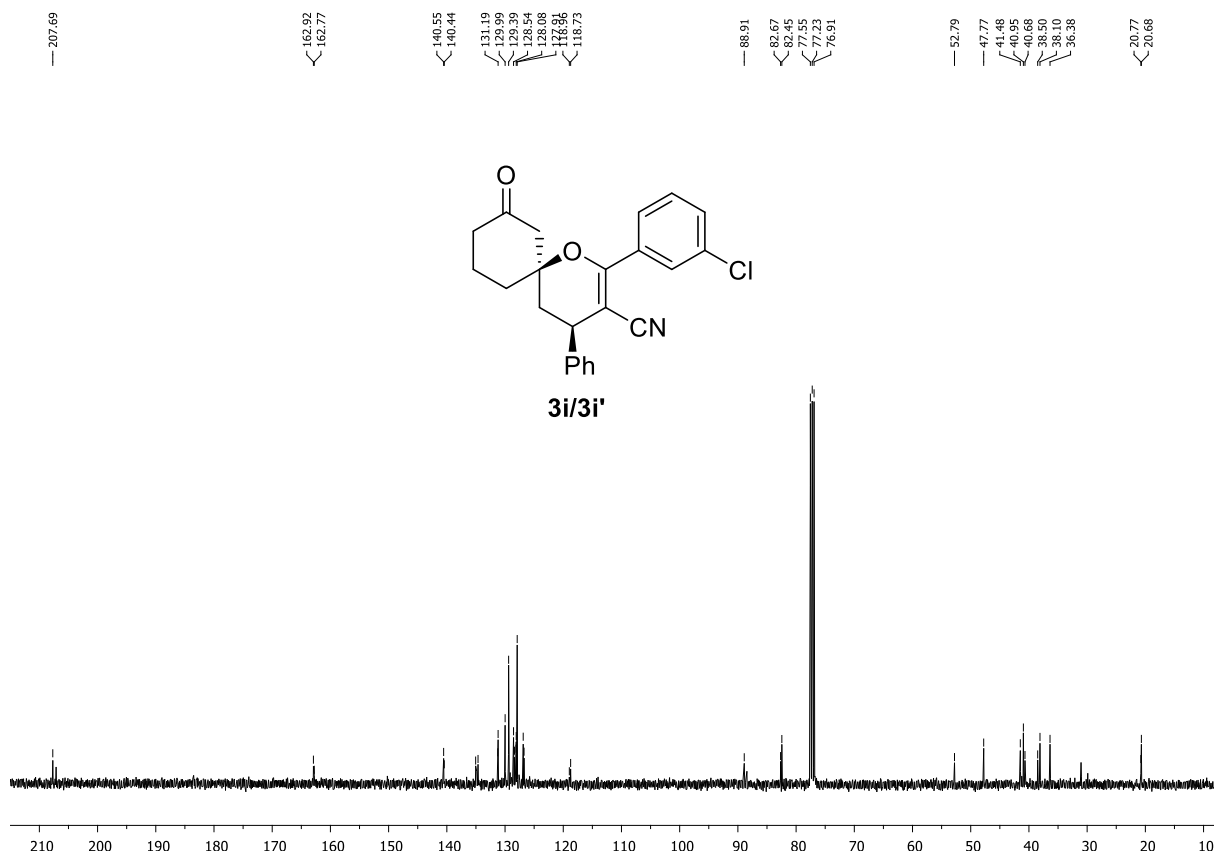

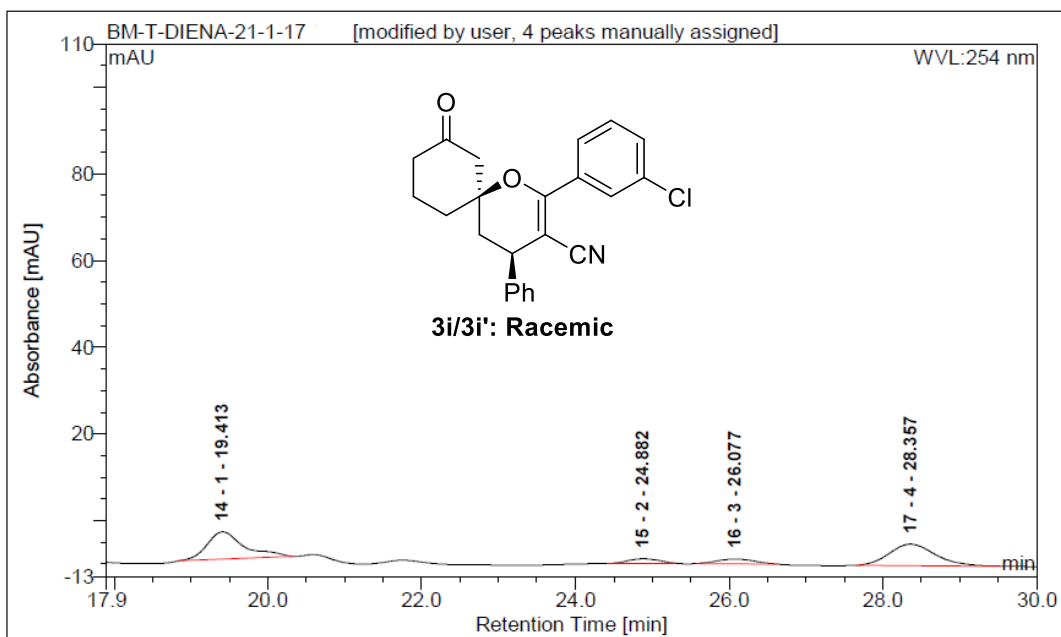

| No.  | Peak Name | Ret.Time (detected)<br>min | Area<br>mAU*min | Rel.Area(ident.)<br>% | Height<br>mAU | Amount |
|------|-----------|----------------------------|-----------------|-----------------------|---------------|--------|
| 14 1 |           | 19.41                      | 3.562404        | 43.73801024           | 6.31914       | n.a.   |
| 15 2 |           | 24.88                      | 0.522868        | 6.419601887           | 1.11104       | n.a.   |
| 16 3 |           | 26.08                      | 0.637827        | 7.831022772           | 1.15595       | n.a.   |
| 17 4 |           | 28.36                      | 3.422           | 42.0113651            | 4.941         | n.a.   |

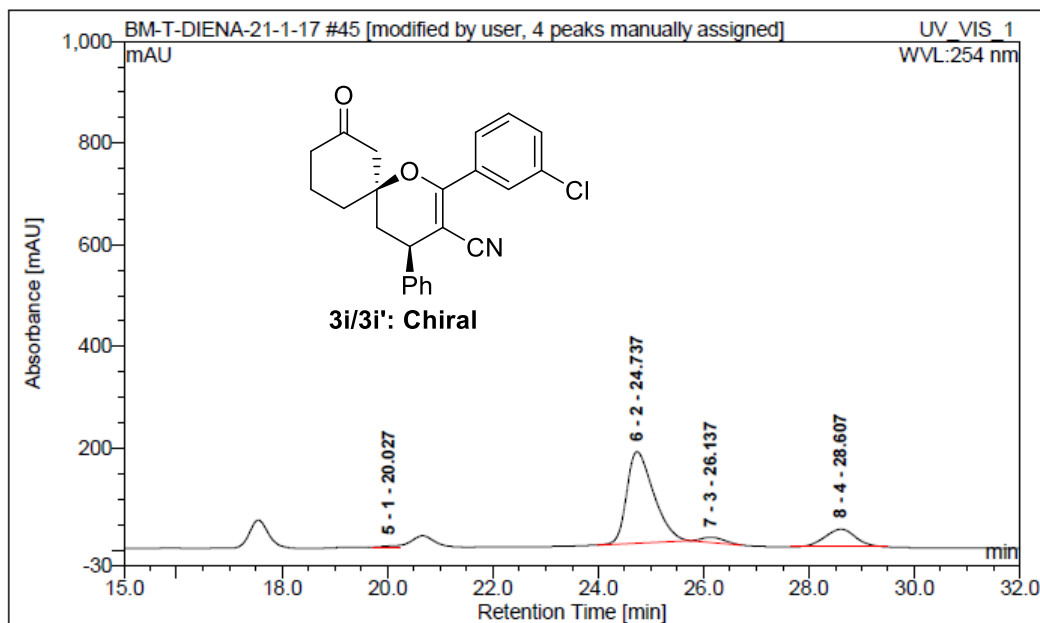

| No. | Peak Name | Ret.Time (detected)<br>min | Area<br>mAU*min | Rel.Area(ident.)<br>% | Height<br>mAU | Amount |
|-----|-----------|----------------------------|-----------------|-----------------------|---------------|--------|
| 5 1 |           | 20.03                      | 0.894412        | 0.6587112772          | 2.33277       | n.a.   |
| 6 2 |           | 24.74                      | 106.1595        | 78.18374177           | 179.5268      | n.a.   |
| 7 3 |           | 26.14                      | 4.904411        | 3.611971658           | 9.87111       | n.a.   |
| 8 4 |           | 28.61                      | 23.824          | 17.5455753            | 34.668        | n.a.   |



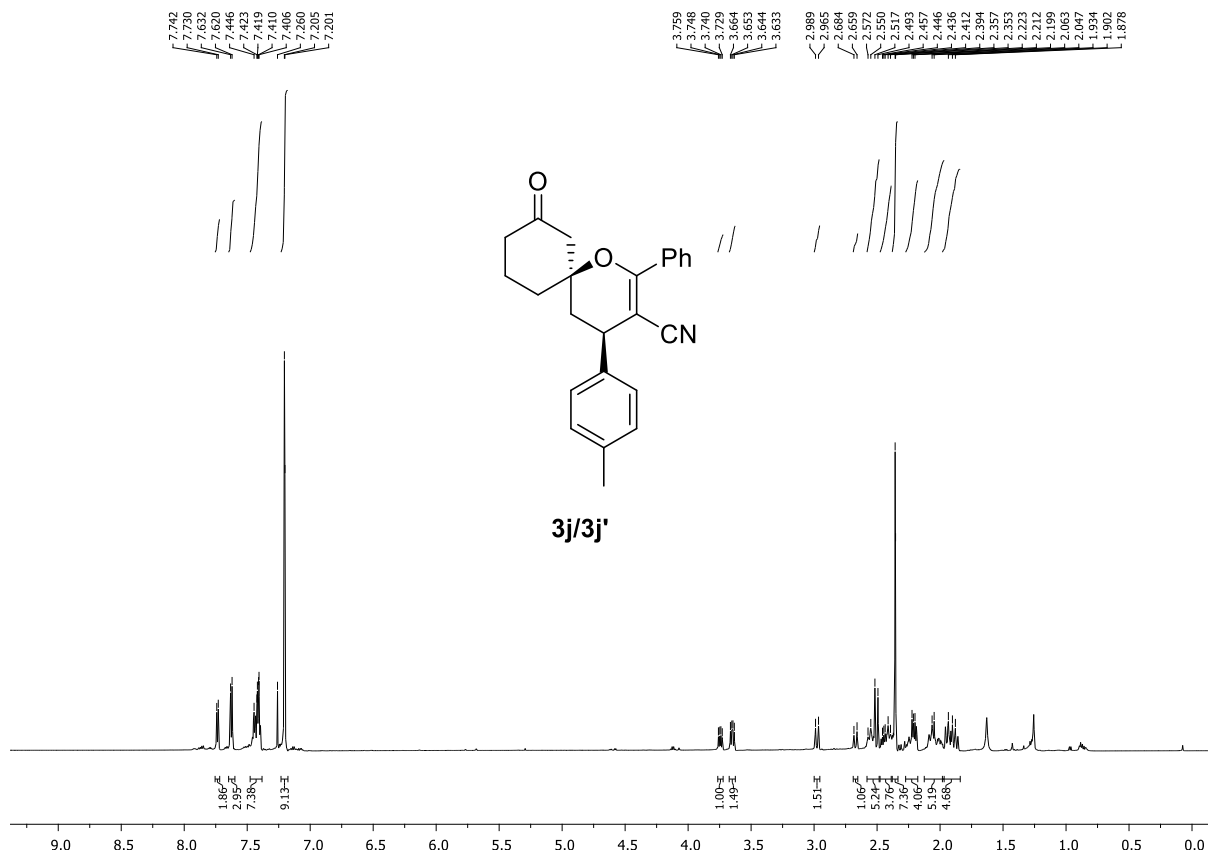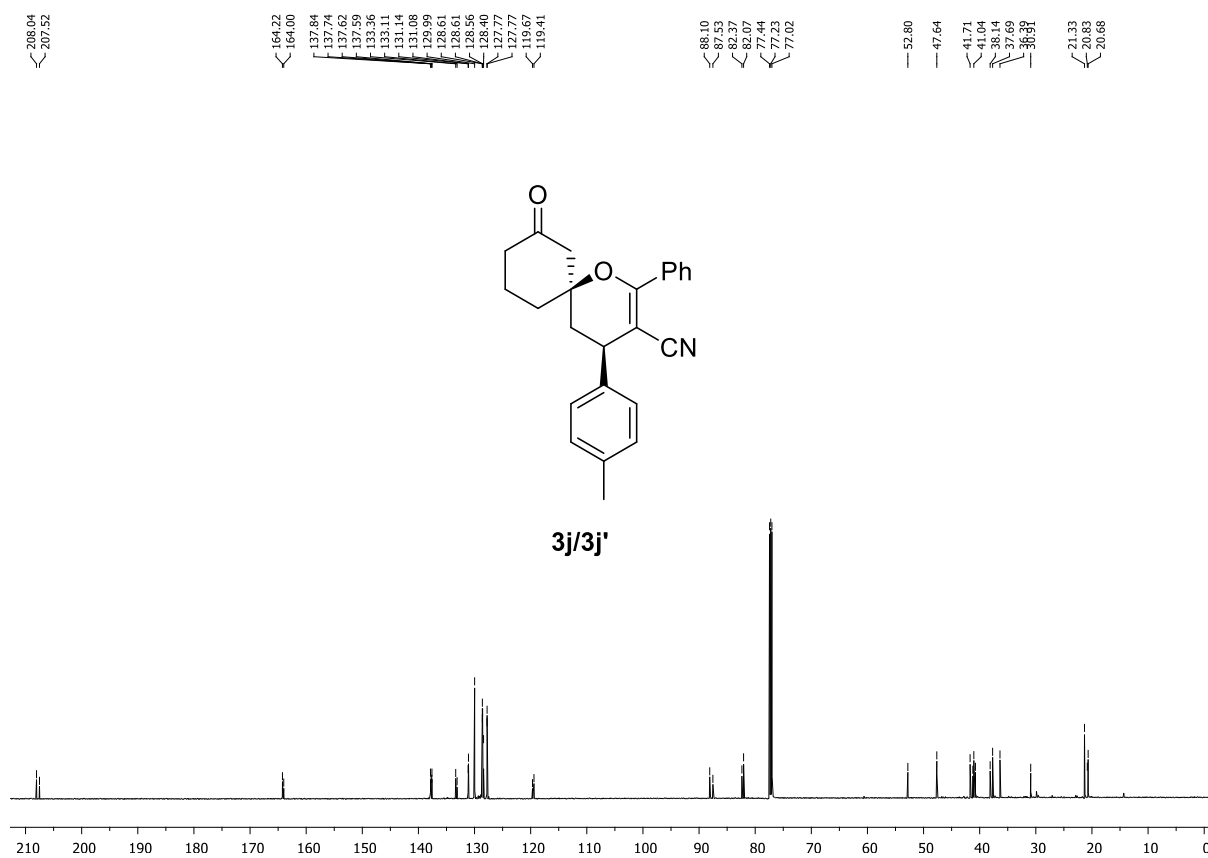

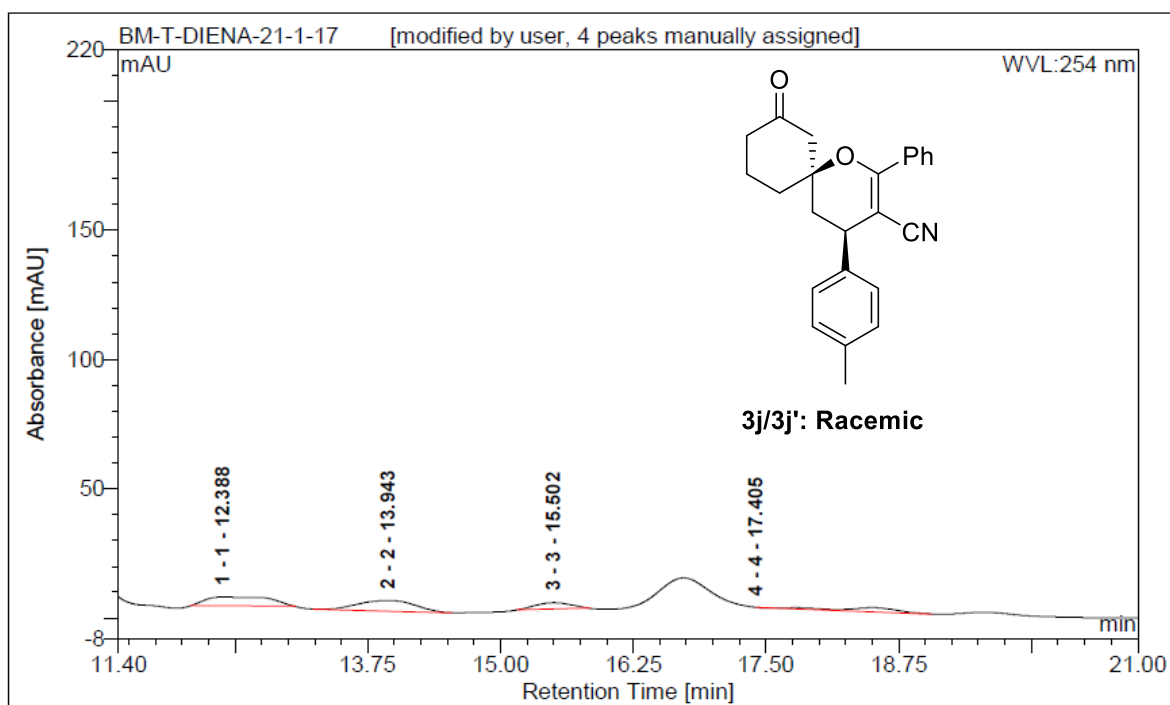

| No. | Peak Name | Ret.Time (detected)<br>min | Area<br>mAU*min | Rel.Area(ident.)<br>% | Height<br>mAU | Amount |
|-----|-----------|----------------------------|-----------------|-----------------------|---------------|--------|
| 1 1 |           | 12.39                      | 2.530226        | 36.43524941           | 3.53372       | n.a.   |
| 2 2 |           | 13.94                      | 2.51917         | 36.27604341           | 4.1084        | n.a.   |
| 3 3 |           | 15.50                      | 0.985709        | 14.19420428           | 2.48043       | n.a.   |
| 4 4 |           | 17.41                      | 0.909           | 13.0945029            | 0.004         | n.a.   |

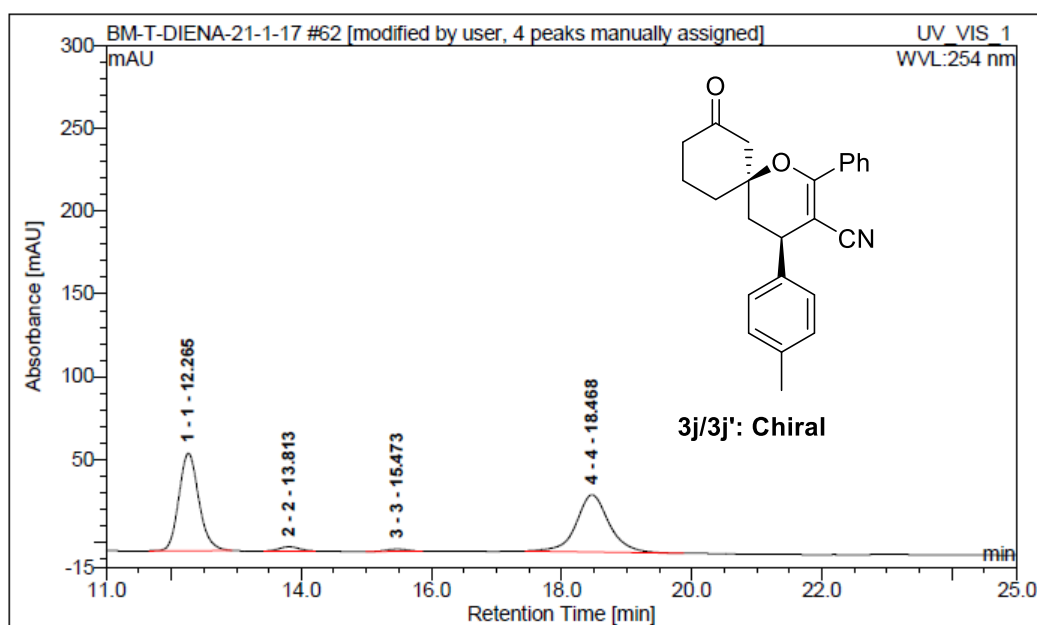

| No. | Peak Name | Ret.Time (detected)<br>min | Area<br>mAU*min | Rel.Area(ident.)<br>% | Height<br>mAU | Amount |
|-----|-----------|----------------------------|-----------------|-----------------------|---------------|--------|
| 1 1 |           | 12.27                      | 20.88991        | 49.02230559           | 58.80935      | n.a.   |
| 2 2 |           | 13.81                      | 0.884084        | 2.074678177           | 2.49281       | n.a.   |
| 3 3 |           | 15.47                      | 0.541877        | 1.271621003           | 1.41633       | n.a.   |
| 4 4 |           | 18.47                      | 20.297          | 47.63139523           | 34.484        | n.a.   |

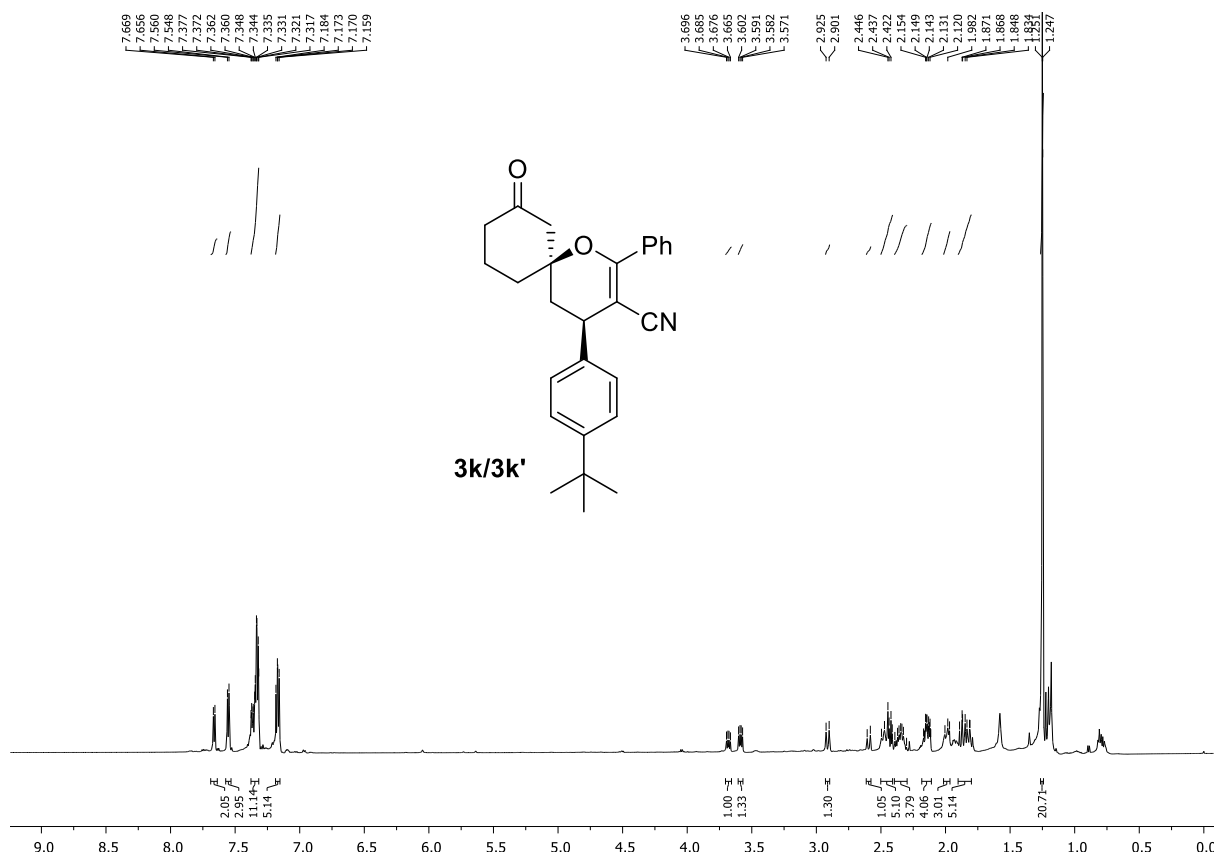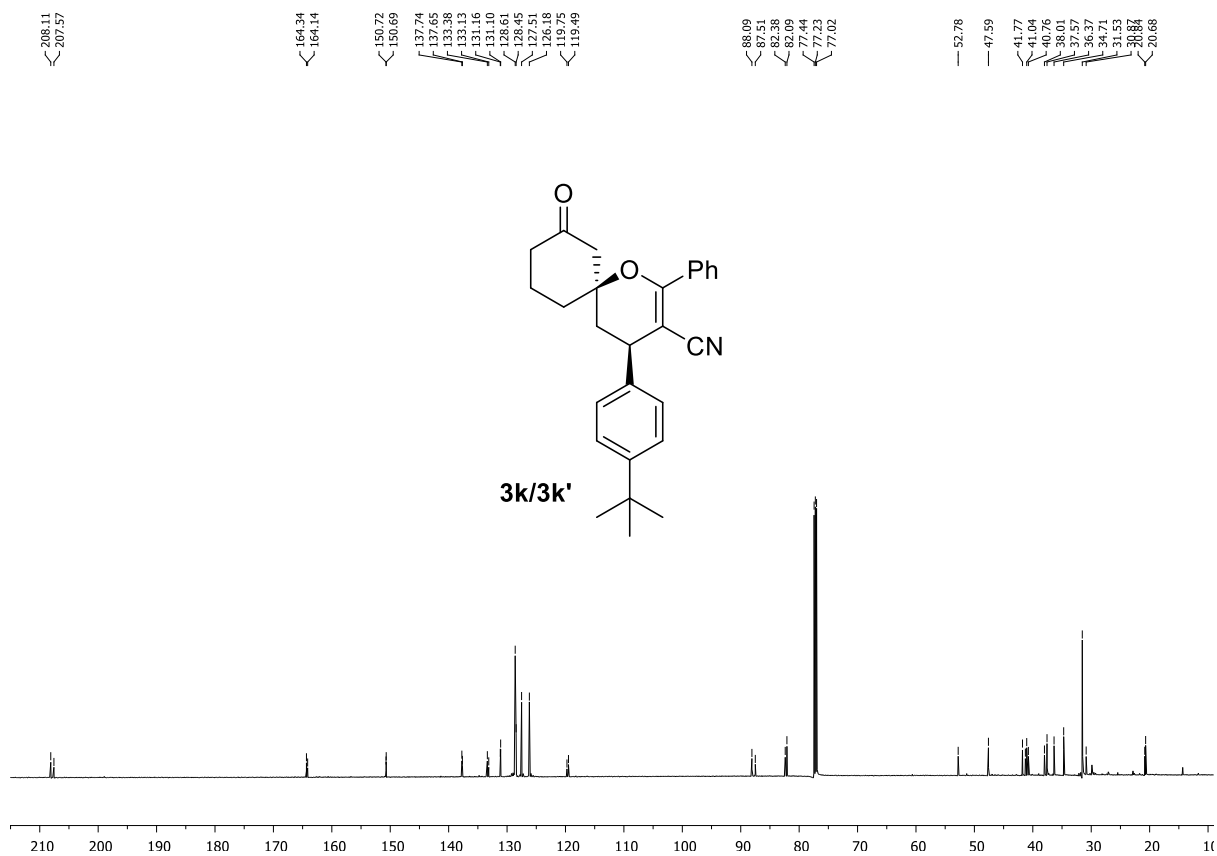

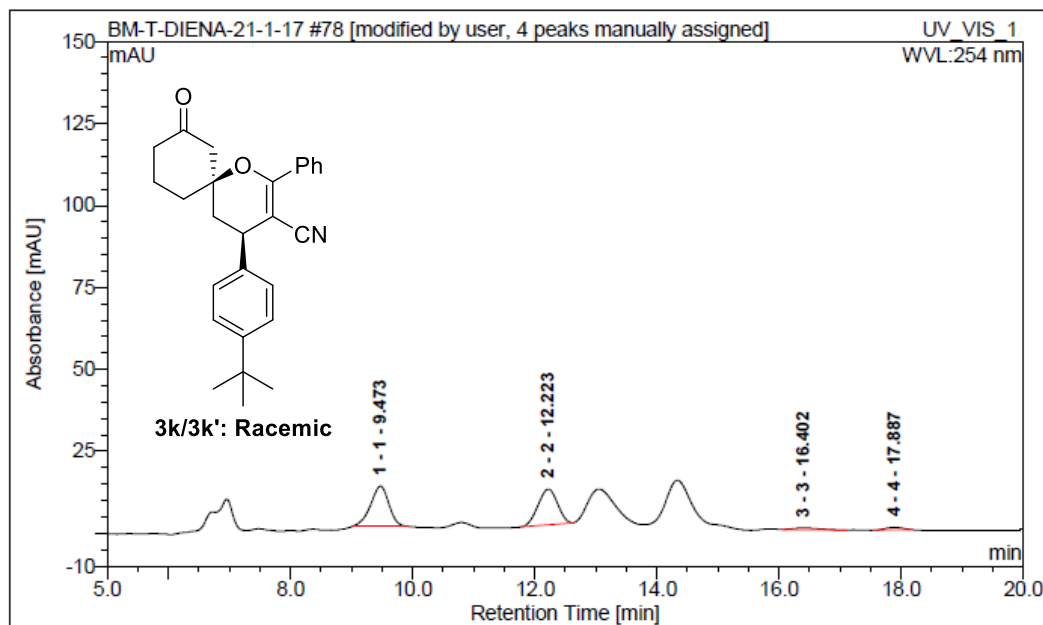

| No. | Peak Name | Ret.Time (detected)<br>min | Area<br>mAU*min | Rel.Area(ident.)<br>% | Height<br>mAU | Amount |
|-----|-----------|----------------------------|-----------------|-----------------------|---------------|--------|
| 1 1 |           | 9.47                       | 4.261071        | 48.67102725           | 12.24656      | n.a.   |
| 2 2 |           | 12.22                      | 4.004442        | 45.73974561           | 10.87258      | n.a.   |
| 3 3 |           | 16.40                      | 0.223642        | 2.554494911           | 0.52054       | n.a.   |
| 4 4 |           | 17.89                      | 0.266           | 3.034732225           | 0.808         | n.a.   |

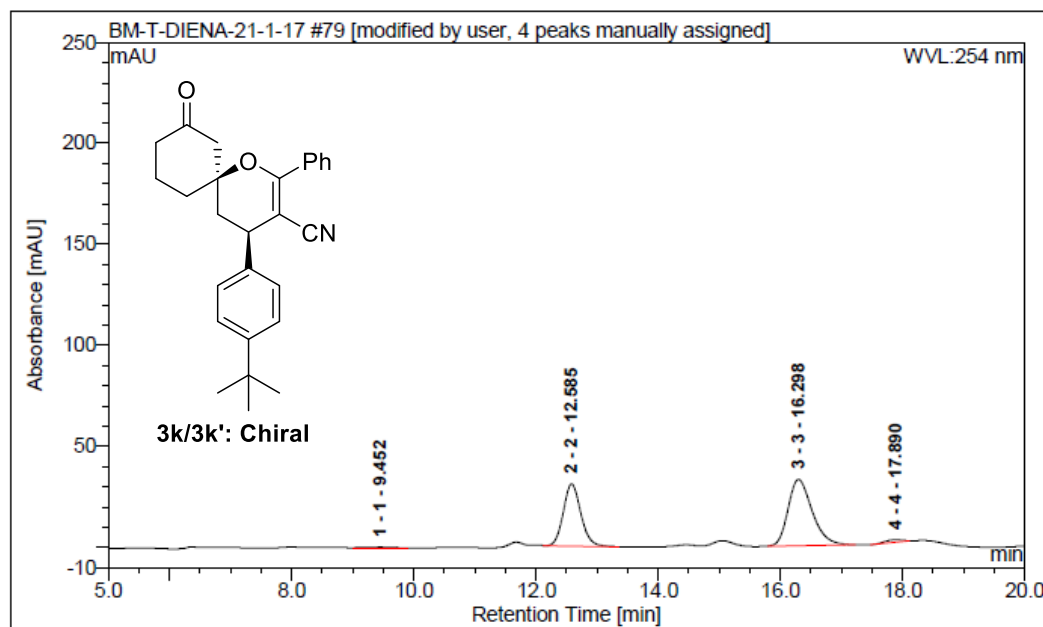

| No. | Peak Name | Ret.Time (detected)<br>min | Area<br>mAU*min | Rel.Area(ident.)<br>% | Height<br>mAU | Amount |
|-----|-----------|----------------------------|-----------------|-----------------------|---------------|--------|
| 1 1 |           | 9.45                       | 0.112345        | 0.4375368061          | 0.30959       | n.a.   |
| 2 2 |           | 12.59                      | 10.22547        | 39.82406714           | 30.7818       | n.a.   |
| 3 3 |           | 16.30                      | 14.95458        | 58.24202817           | 32.78086      | n.a.   |
| 4 4 |           | 17.89                      | 0.384           | 1.496367886           | 1.171         | n.a.   |

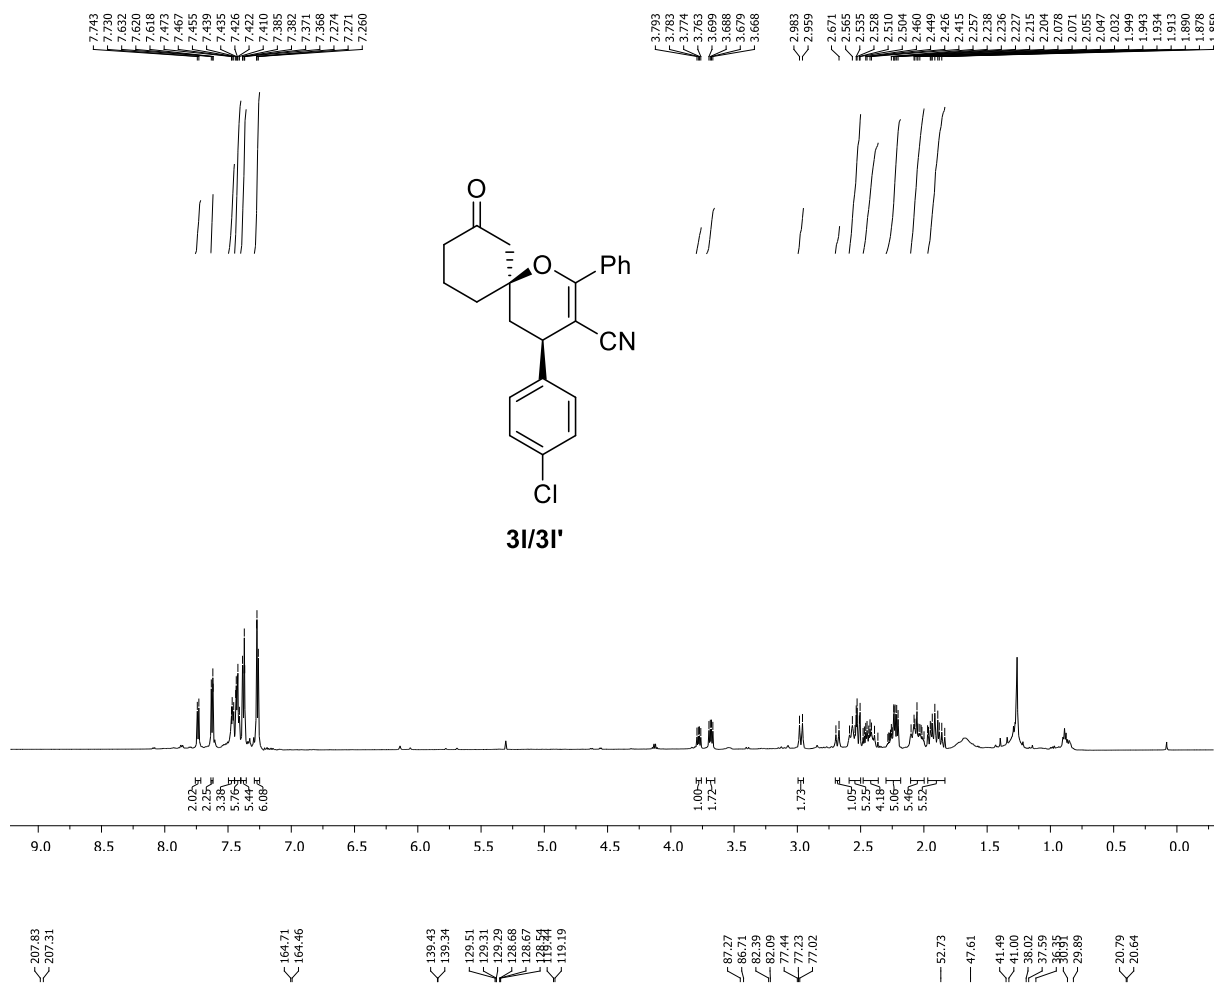

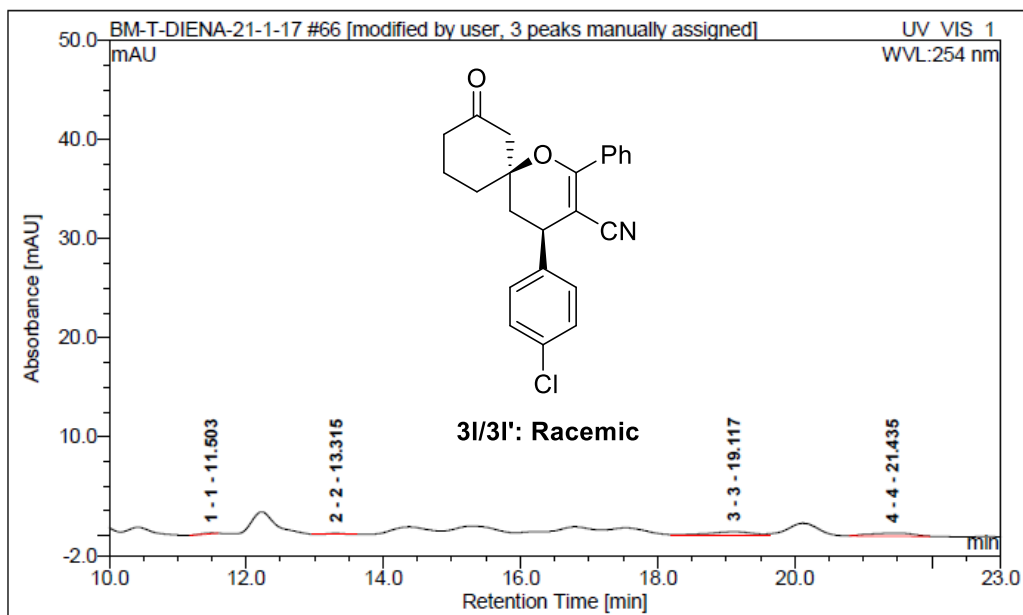

| No. | Peak Name | Ret. Time (detected) min | Area mAU*min | Rel. Area (ident.) % | Height mAU | Amount |
|-----|-----------|--------------------------|--------------|----------------------|------------|--------|
| 1   | 1         | 11.50                    | 0.019053     | 4.281069062          | 0.08031    | n.a.   |
| 2   | 2         | 13.32                    | 0.019343     | 4.346202186          | 0.09331    | n.a.   |
| 3   | 3         | 19.12                    | 0.204909     | 46.0417186           | 0.31315    | n.a.   |
| 4   | 4         | 21.44                    | 0.202        | 45.33101015          | 0.298      | n.a.   |

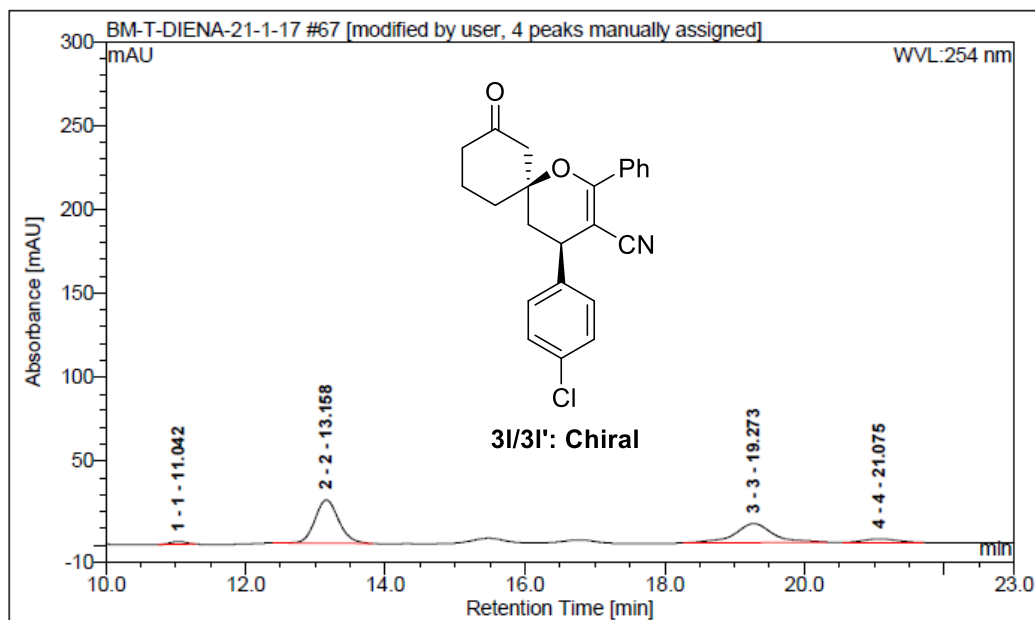

| No. | Peak Name | Ret. Time (detected) min | Area mAU*min | Rel. Area (ident.) % | Height mAU | Amount |
|-----|-----------|--------------------------|--------------|----------------------|------------|--------|
| 1   | 1         | 11.04                    | 0.431483     | 2.280002384          | 1.62       | n.a.   |
| 2   | 2         | 13.16                    | 10.23206     | 54.06738018          | 25.87591   | n.a.   |
| 3   | 3         | 19.27                    | 7.099736     | 37.51580334          | 11.28491   | n.a.   |
| 4   | 4         | 21.08                    | 1.161        | 6.13681409           | 2.139      | n.a.   |

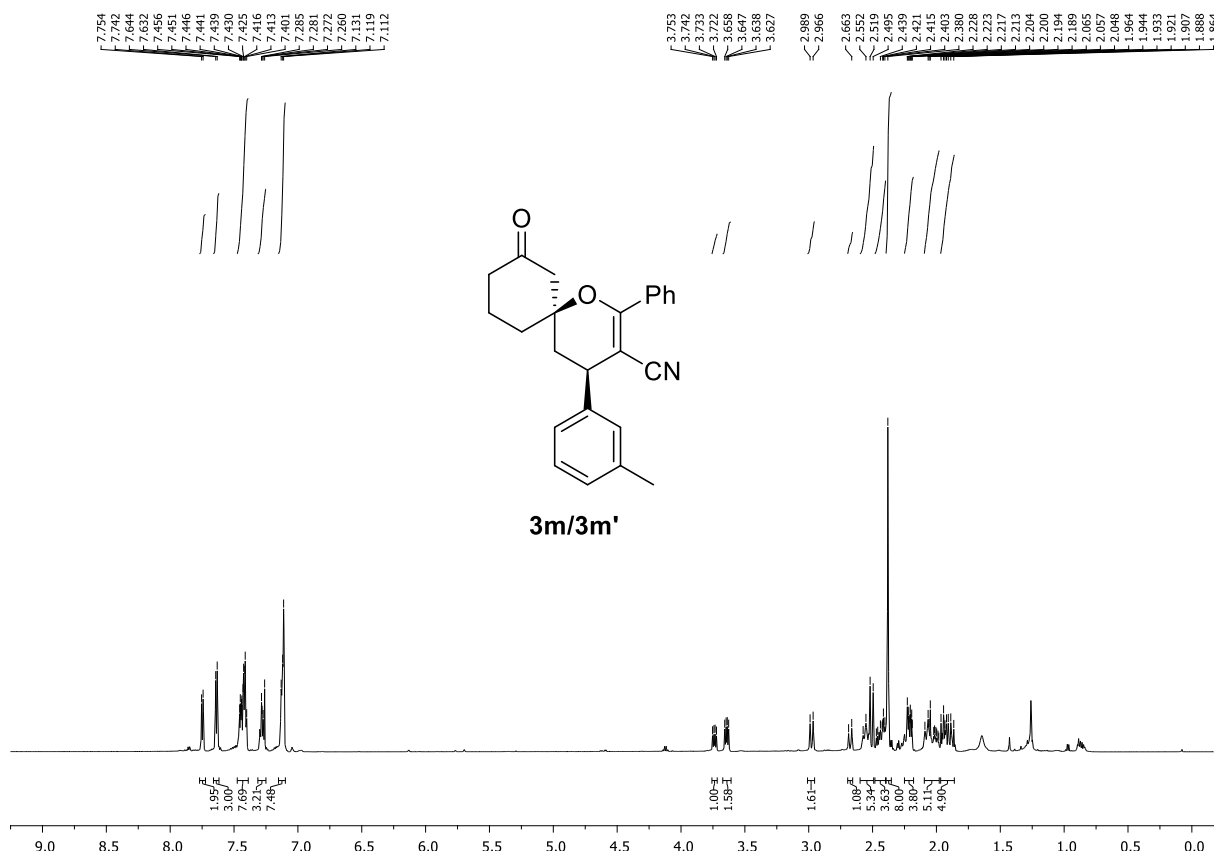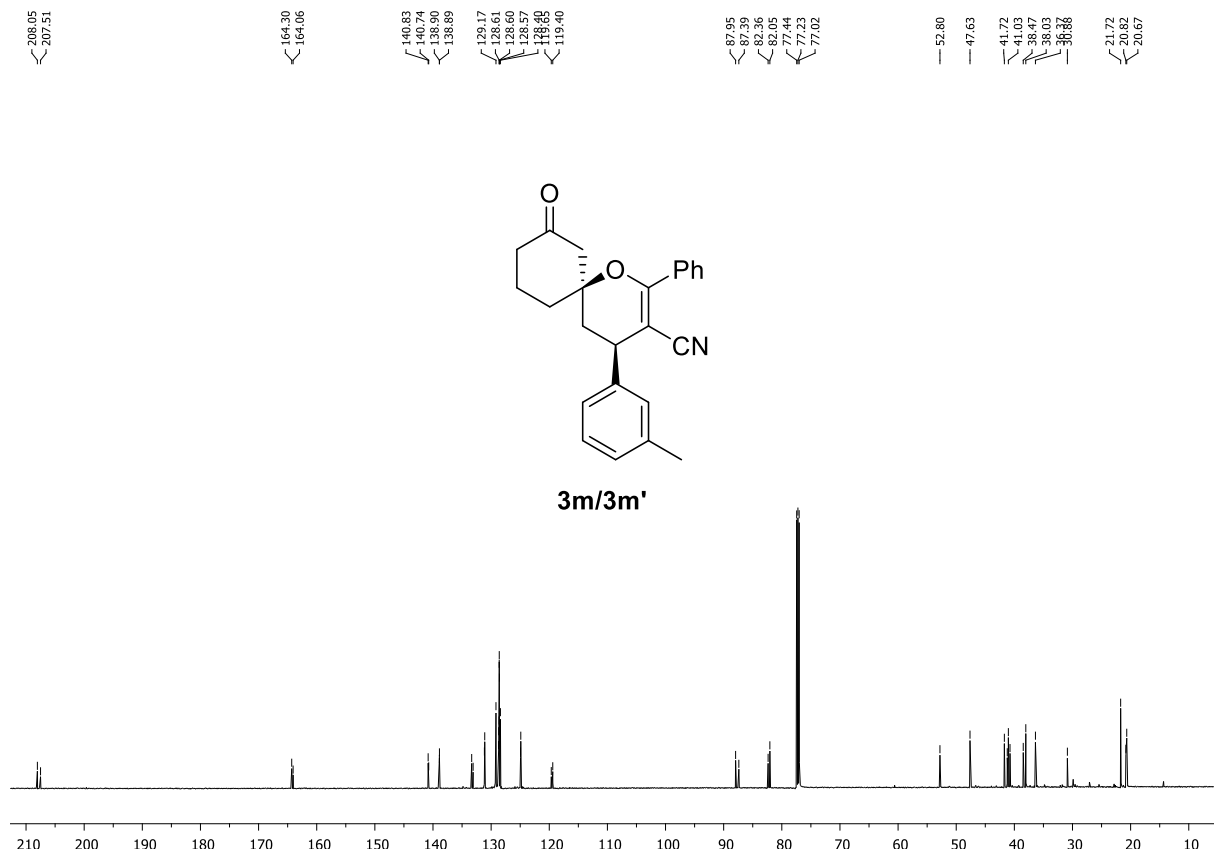

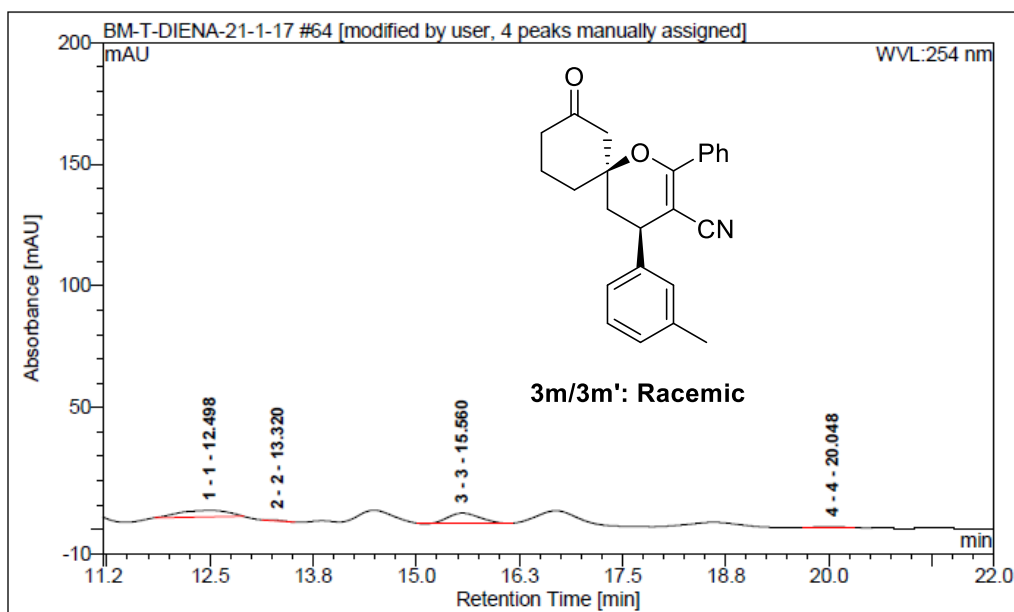

| No. | Peak Name | Ret.Time (detected) min | Area mAU*min | Rel.Area(ident.) % | Height mAU | Amount |
|-----|-----------|-------------------------|--------------|--------------------|------------|--------|
| 1   | 1         | 12.50                   | 1.820015     | 48.68822407        | 2.6453     | n.a.   |
| 2   | 2         | 13.32                   | 0.064621     | 1.728712757        | 0.31565    | n.a.   |
| 3   | 3         | 15.56                   | 1.765341     | 47.22559716        | 4.11869    | n.a.   |
| 4   | 4         | 20.05                   | 0.088        | 2.357466012        | 0.220      | n.a.   |

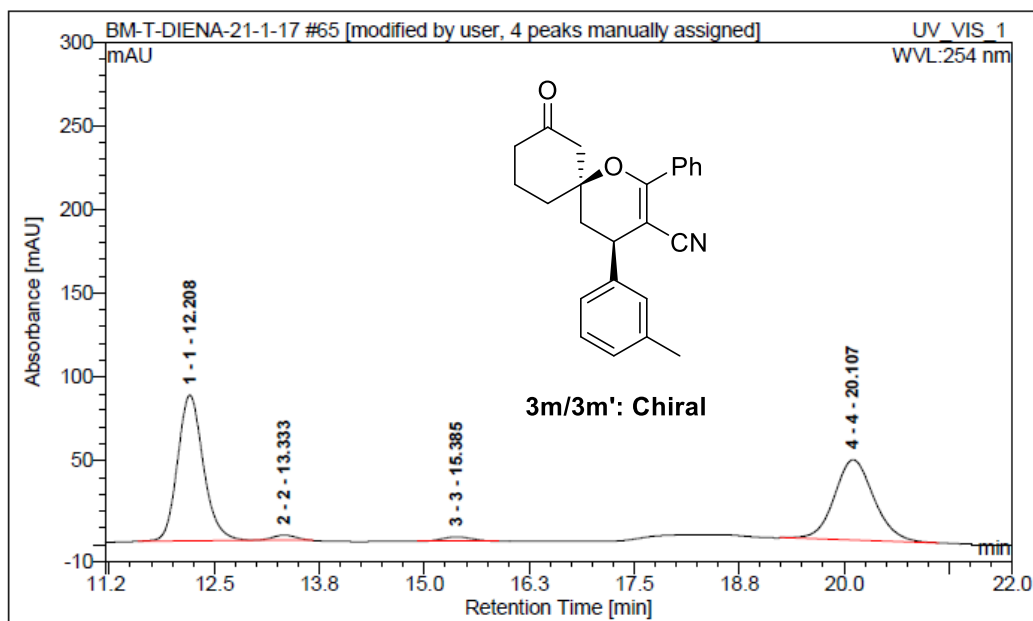

| No. | Peak Name | Ret.Time (detected) min | Area mAU*min | Rel.Area(ident.) % | Height mAU | Amount |
|-----|-----------|-------------------------|--------------|--------------------|------------|--------|
| 1   | 1         | 12.21                   | 31.07365     | 52.23454485        | 86.98119   | n.a.   |
| 2   | 2         | 13.33                   | 1.020616     | 1.715646922        | 3.11022    | n.a.   |
| 3   | 3         | 15.39                   | 1.152092     | 1.936655992        | 2.7452     | n.a.   |
| 4   | 4         | 20.11                   | 26.242       | 44.11315223        | 47.984     | n.a.   |



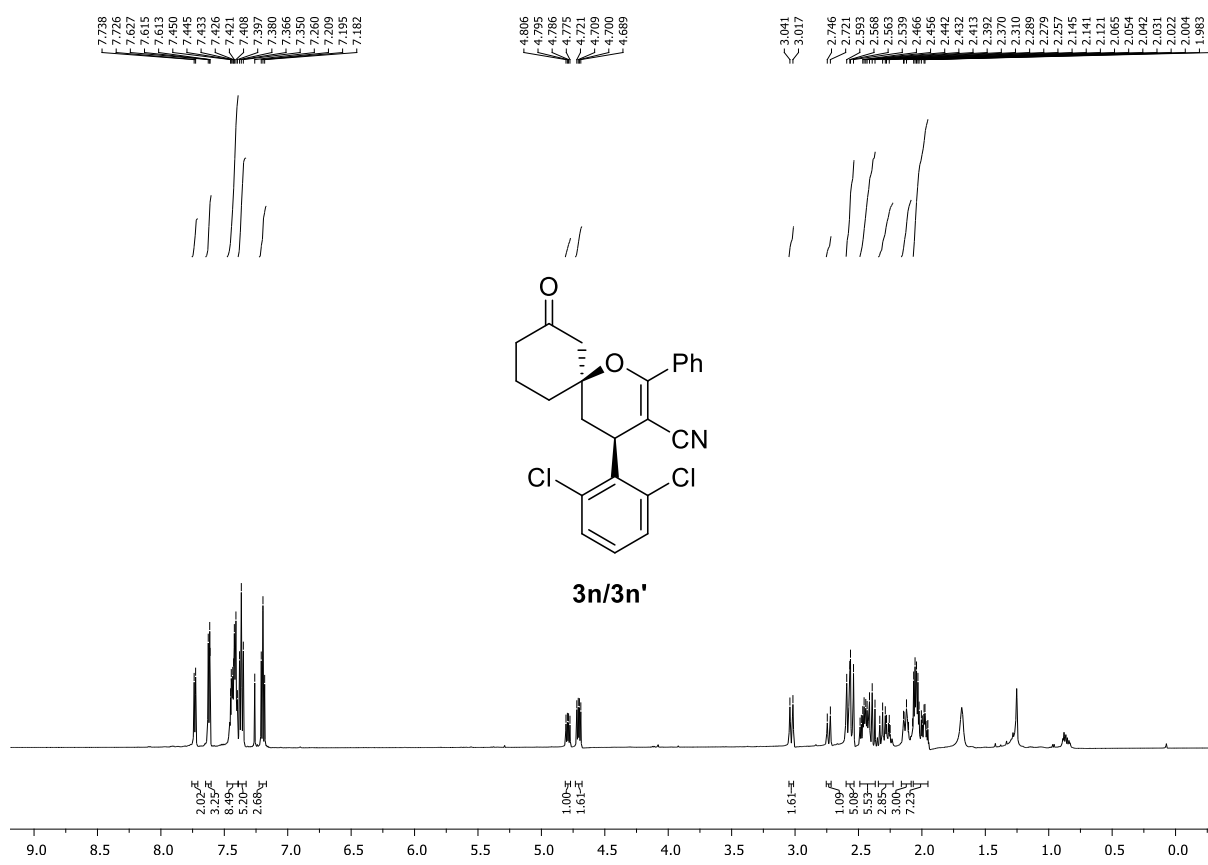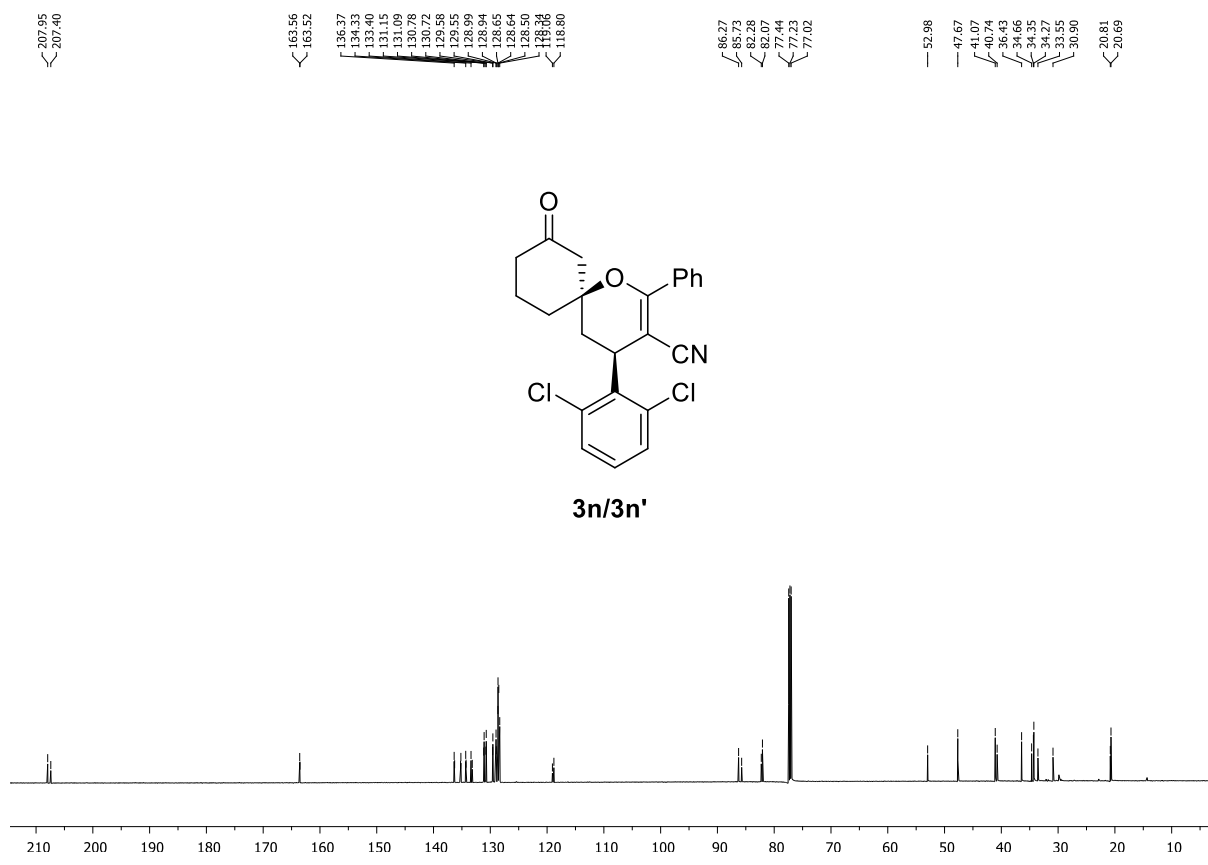

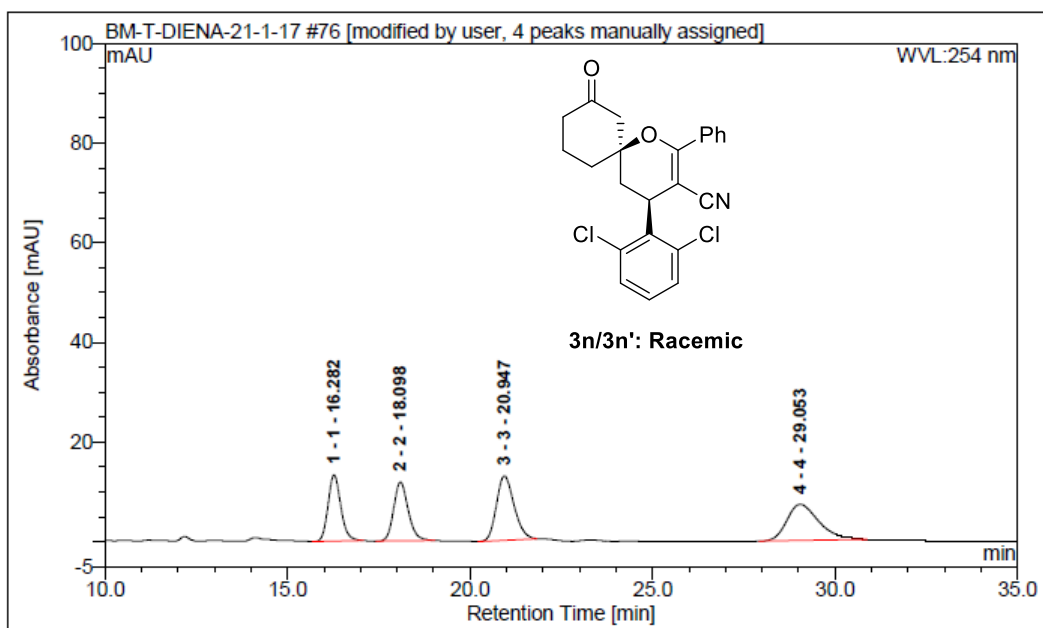

| No. | Peak Name | Ret.Time (detected)<br>min | Area<br>mAU*min | Rel.Area(ident.)<br>% | Height<br>mAU | Amount |
|-----|-----------|----------------------------|-----------------|-----------------------|---------------|--------|
| 1   | 1         | 16.28                      | 5.369914        | 21.05003086           | 13.27281      | n.a.   |
| 2   | 2         | 18.10                      | 5.474008        | 21.45808027           | 11.80687      | n.a.   |
| 3   | 3         | 20.95                      | 7.234977        | 28.36106751           | 12.92189      | n.a.   |
| 4   | 4         | 29.05                      | 7.431           | 29.13082136           | 7.275         | n.a.   |

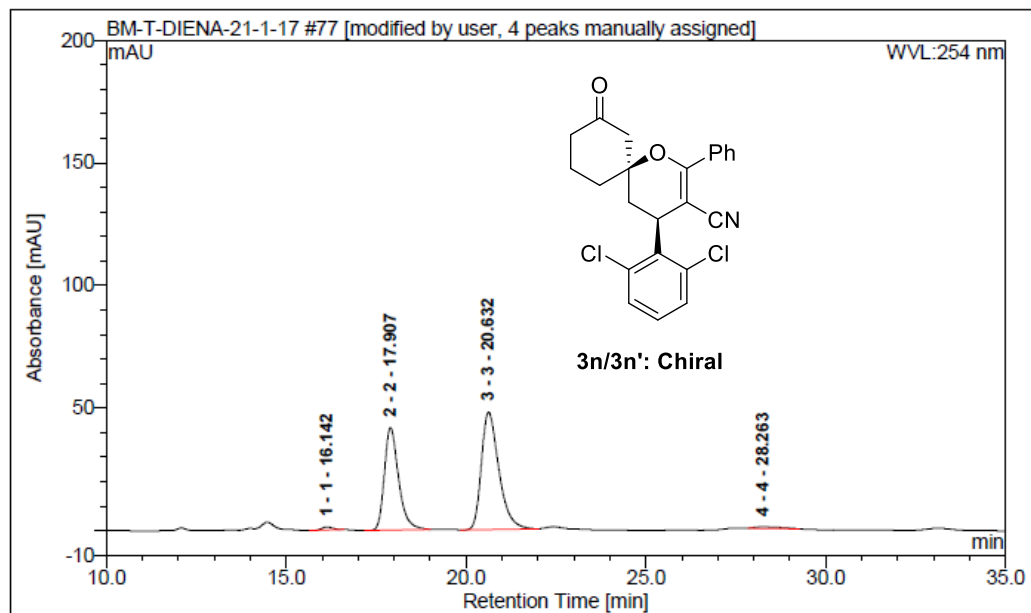

| No. | Peak Name | Ret.Time (detected)<br>min | Area<br>mAU*min | Rel.Area(ident.)<br>% | Height<br>mAU | Amount |
|-----|-----------|----------------------------|-----------------|-----------------------|---------------|--------|
| 1   | 1         | 16.14                      | 0.405991        | 0.8626425553          | 1.20091       | n.a.   |
| 2   | 2         | 17.91                      | 19.14793        | 40.68520265           | 41.82359      | n.a.   |
| 3   | 3         | 20.63                      | 26.94174        | 57.24534544           | 47.84936      | n.a.   |
| 4   | 4         | 28.26                      | 0.568           | 1.206809357           | 0.653         | n.a.   |

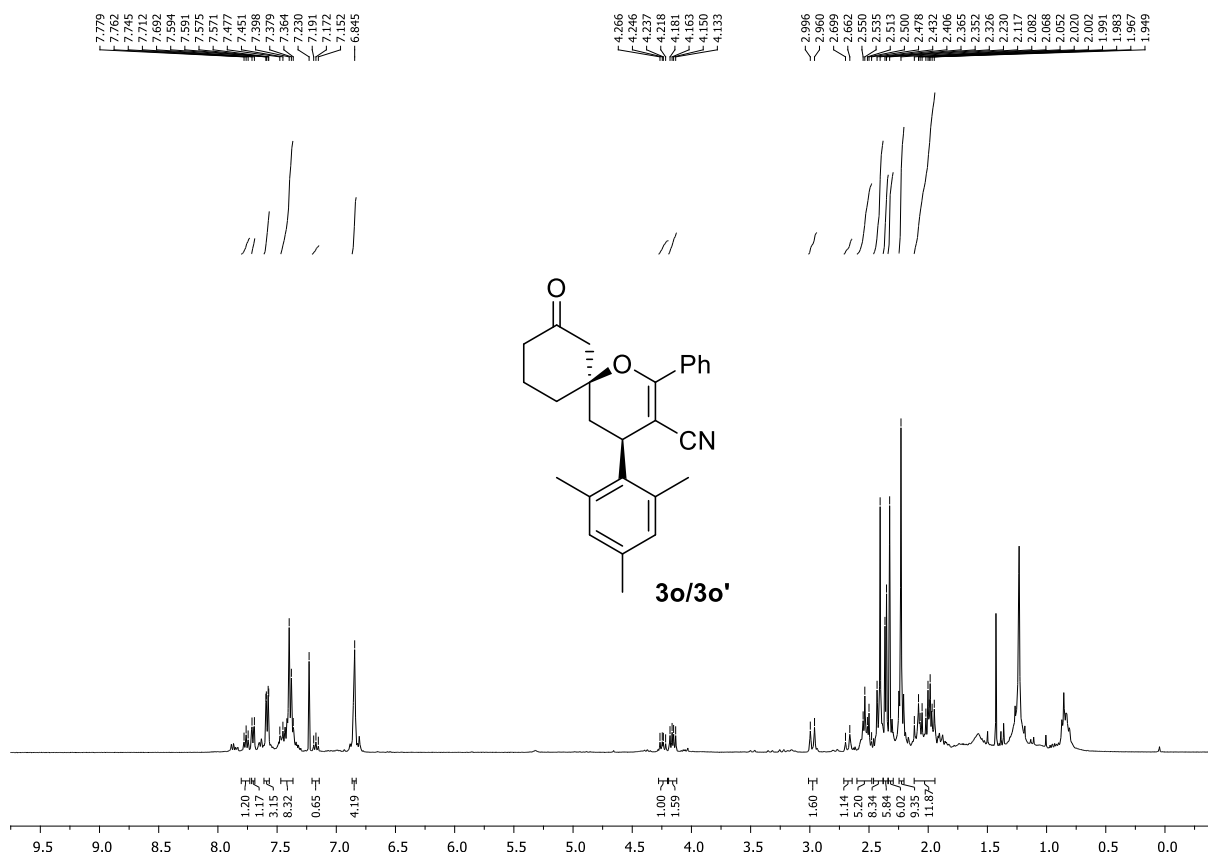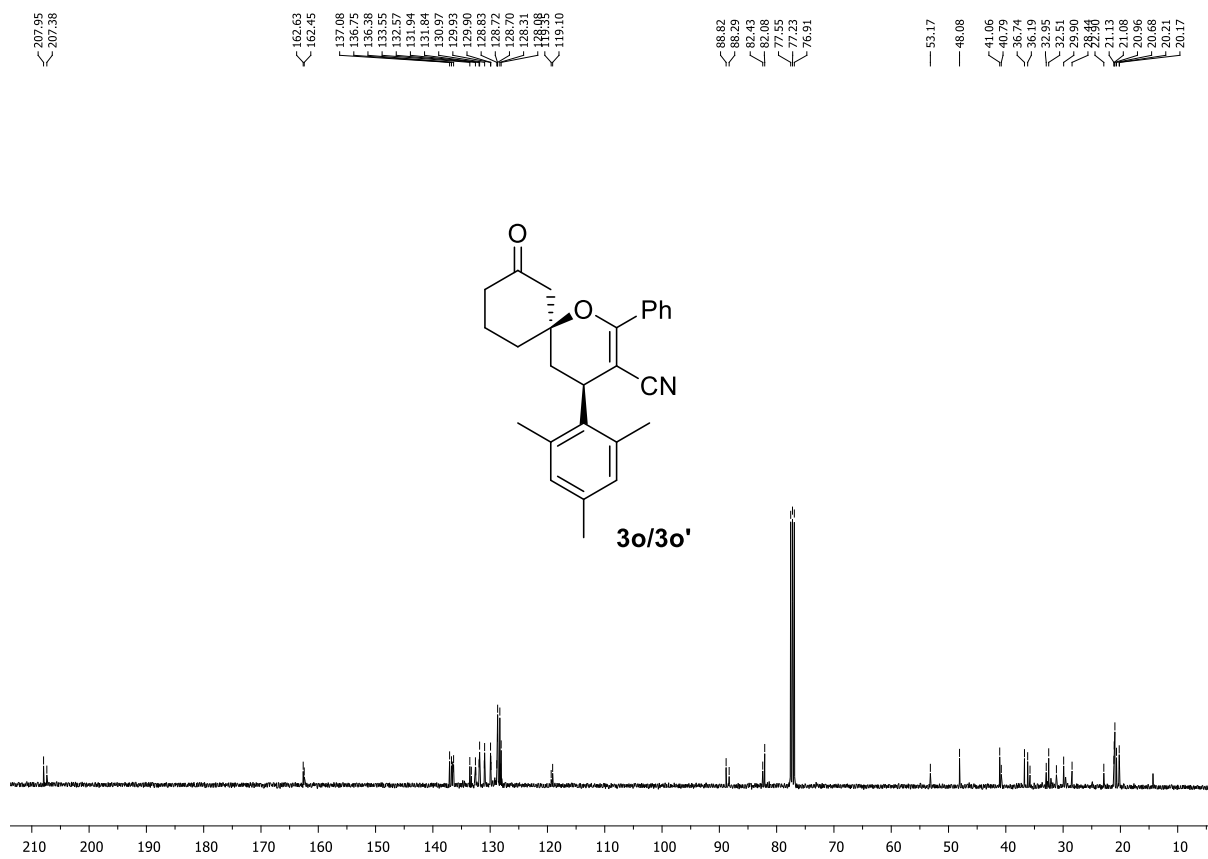

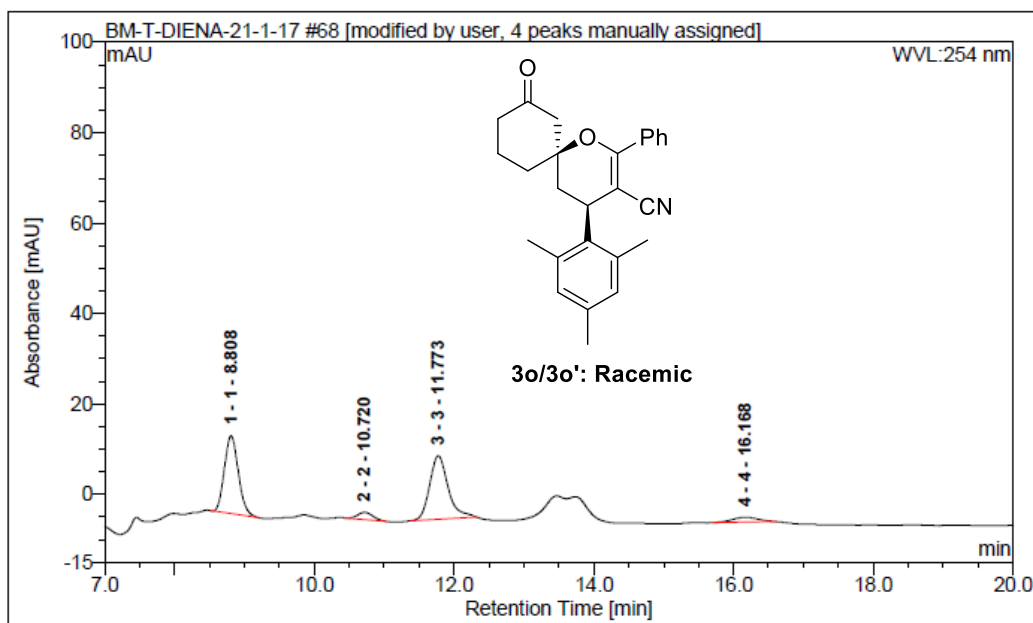

| No. | Peak Name | Ret. Time (detected) min | Area mAU*min | Rel. Area (ident.) % | Height mAU | Amount |
|-----|-----------|--------------------------|--------------|----------------------|------------|--------|
| 1   | 1         | 8.81                     | 4.011835     | 43.78810173          | 17.2457    | n.a.   |
| 2   | 2         | 10.72                    | 0.399844     | 4.364191072          | 1.59406    | n.a.   |
| 3   | 3         | 11.77                    | 4.295888     | 46.88846891          | 14.04893   | n.a.   |
| 4   | 4         | 16.17                    | 0.454        | 4.959238281          | 1.054      | n.a.   |

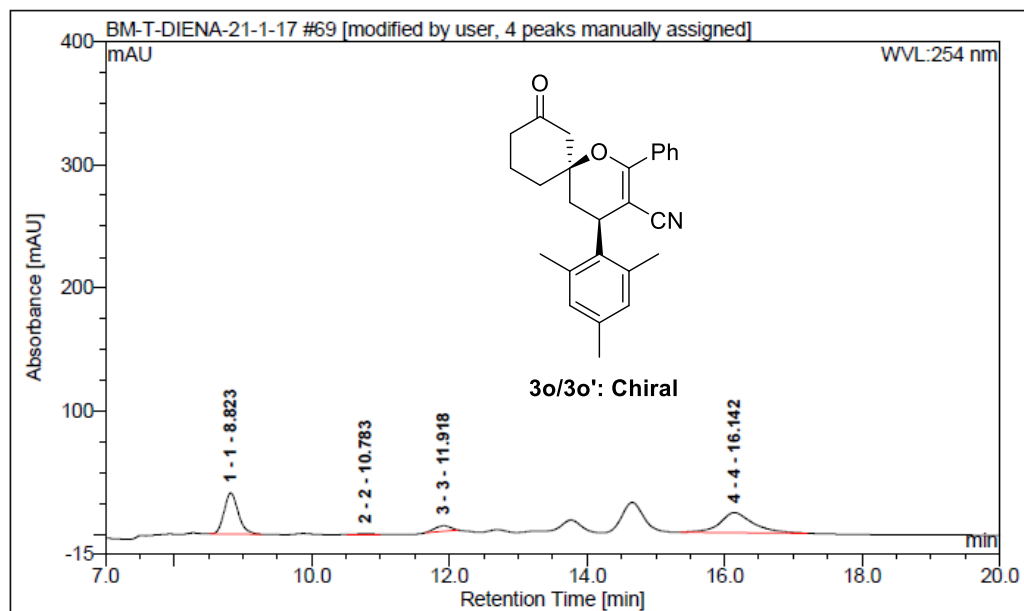

| No. | Peak Name | Ret. Time (detected) min | Area mAU*min | Rel. Area (ident.) % | Height mAU | Amount |
|-----|-----------|--------------------------|--------------|----------------------|------------|--------|
| 1   | 1         | 8.82                     | 7.949954     | 43.23766986          | 33.30797   | n.a.   |
| 2   | 2         | 10.78                    | 0.171969     | 0.9352927514         | 0.74281    | n.a.   |
| 3   | 3         | 11.92                    | 1.126343     | 6.125875559          | 4.25539    | n.a.   |
| 4   | 4         | 16.14                    | 9.138        | 49.70116183          | 16.265     | n.a.   |

7.75, 7.74, 7.73, 7.72, 7.71, 7.70, 7.69, 7.68, 7.67, 7.66, 7.65, 7.64, 7.63, 7.62, 7.61, 7.60, 7.59, 7.58, 7.57, 7.56, 7.55, 7.54, 7.53, 7.52, 7.51, 7.50, 7.49, 7.48, 7.47, 7.46, 7.45, 7.44, 7.43, 7.42, 7.41, 7.40, 7.39, 7.38, 7.37, 7.36, 7.35, 7.34, 7.33, 7.32, 7.31, 7.30, 7.29, 7.28, 7.27, 7.26, 7.25, 7.24, 7.23, 7.22, 7.21, 7.20, 7.19, 7.18, 7.17, 7.16, 7.15, 7.14, 7.13, 7.12, 7.11, 7.10, 7.09, 7.08, 7.07, 7.06, 7.05, 7.04, 7.03, 7.02, 7.01, 7.00, 6.99, 6.98, 6.97, 6.96, 6.95, 6.94, 6.93, 6.92, 6.91, 6.90, 6.89, 6.88, 6.87, 6.86, 6.85, 6.84, 6.83, 6.82, 6.81, 6.80, 6.79, 6.78, 6.77, 6.76, 6.75, 6.74, 6.73, 6.72, 6.71, 6.70, 6.69, 6.68, 6.67, 6.66, 6.65, 6.64, 6.63, 6.62, 6.61, 6.60, 6.59, 6.58, 6.57, 6.56, 6.55, 6.54, 6.53, 6.52, 6.51, 6.50, 6.49, 6.48, 6.47, 6.46, 6.45, 6.44, 6.43, 6.42, 6.41, 6.40, 6.39, 6.38, 6.37, 6.36, 6.35, 6.34, 6.33, 6.32, 6.31, 6.30, 6.29, 6.28, 6.27, 6.26, 6.25, 6.24, 6.23, 6.22, 6.21, 6.20, 6.19, 6.18, 6.17, 6.16, 6.15, 6.14, 6.13, 6.12, 6.11, 6.10, 6.09, 6.08, 6.07, 6.06, 6.05, 6.04, 6.03, 6.02, 6.01, 6.00, 5.99, 5.98, 5.97, 5.96, 5.95, 5.94, 5.93, 5.92, 5.91, 5.90, 5.89, 5.88, 5.87, 5.86, 5.85, 5.84, 5.83, 5.82, 5.81, 5.80, 5.79, 5.78, 5.77, 5.76, 5.75, 5.74, 5.73, 5.72, 5.71, 5.70, 5.69, 5.68, 5.67, 5.66, 5.65, 5.64, 5.63, 5.62, 5.61, 5.60, 5.59, 5.58, 5.57, 5.56, 5.55, 5.54, 5.53, 5.52, 5.51, 5.50, 5.49, 5.48, 5.47, 5.46, 5.45, 5.44, 5.43, 5.42, 5.41, 5.40, 5.39, 5.38, 5.37, 5.36, 5.35, 5.34, 5.33, 5.32, 5.31, 5.30, 5.29, 5.28, 5.27, 5.26, 5.25, 5.24, 5.23, 5.22, 5.21, 5.20, 5.19, 5.18, 5.17, 5.16, 5.15, 5.14, 5.13, 5.12, 5.11, 5.10, 5.09, 5.08, 5.07, 5.06, 5.05, 5.04, 5.03, 5.02, 5.01, 5.00, 4.99, 4.98, 4.97, 4.96, 4.95, 4.94, 4.93, 4.92, 4.91, 4.90, 4.89, 4.88, 4.87, 4.86, 4.85, 4.84, 4.83, 4.82, 4.81, 4.80, 4.79, 4.78, 4.77, 4.76, 4.75, 4.74, 4.73, 4.72, 4.71, 4.70, 4.69, 4.68, 4.67, 4.66, 4.65, 4.64, 4.63, 4.62, 4.61, 4.60, 4.59, 4.58, 4.57, 4.56, 4.55, 4.54, 4.53, 4.52, 4.51, 4.50, 4.49, 4.48, 4.47, 4.46, 4.45, 4.44, 4.43, 4.42, 4.41, 4.40, 4.39, 4.38, 4.37, 4.36, 4.35, 4.34, 4.33, 4.32, 4.31, 4.30, 4.29, 4.28, 4.27, 4.26, 4.25, 4.24, 4.23, 4.22, 4.21, 4.20, 4.19, 4.18, 4.17, 4.16, 4.15, 4.14, 4.13, 4.12, 4.11, 4.10, 4.09, 4.08, 4.07, 4.06, 4.05, 4.04, 4.03, 4.02, 4.01, 4.00, 3.99, 3.98, 3.97, 3.96, 3.95, 3.94, 3.93, 3.92, 3.91, 3.90, 3.89, 3.88, 3.87, 3.86, 3.85, 3.84, 3.83, 3.82, 3.81, 3.80, 3.79, 3.78, 3.77, 3.76, 3.75, 3.74, 3.73, 3.72, 3.71, 3.70, 3.69, 3.68, 3.67, 3.66, 3.65, 3.64, 3.63, 3.62, 3.61, 3.60, 3.59, 3.58, 3.57, 3.56, 3.55, 3.54, 3.53, 3.52, 3.51, 3.50, 3.49, 3.48, 3.47, 3.46, 3.45, 3.44, 3.43, 3.42, 3.41, 3.40, 3.39, 3.38, 3.37, 3.36, 3.35, 3.34, 3.33, 3.32, 3.31, 3.30, 3.29, 3.28, 3.27, 3.26, 3.25, 3.24, 3.23, 3.22, 3.21, 3.20, 3.19, 3.18, 3.17, 3.16, 3.15, 3.14, 3.13, 3.12, 3.11, 3.10, 3.09, 3.08, 3.07, 3.06, 3.05, 3.04, 3.03, 3.02, 3.01, 3.00, 2.99, 2.98, 2.97, 2.96, 2.95, 2.94, 2.93, 2.92, 2.91, 2.90, 2.89, 2.88, 2.87, 2.86, 2.85, 2.84, 2.83, 2.82, 2.81, 2.80, 2.79, 2.78, 2.77, 2.76, 2.75, 2.74, 2.73, 2.72, 2.71, 2.70, 2.69, 2.68, 2.67, 2.66, 2.65, 2.64, 2.63, 2.62, 2.61, 2.60, 2.59, 2.58, 2.57, 2.56, 2.55, 2.54, 2.53, 2.52, 2.51, 2.50, 2.49, 2.48, 2.47, 2.46, 2.45, 2.44, 2.43, 2.42, 2.41, 2.40, 2.39, 2.38, 2.37, 2.36, 2.35, 2.34, 2.33, 2.32, 2.31, 2.30, 2.29, 2.28, 2.27, 2.26, 2.25, 2.24, 2.23, 2.22, 2.21, 2.20, 2.19, 2.18, 2.17, 2.16, 2.15, 2.14, 2.13, 2.12, 2.11, 2.10, 2.09, 2.08, 2.07, 2.06, 2.05, 2.04, 2.03, 2.02, 2.01, 2.00, 1.99, 1.98, 1.97, 1.96, 1.95, 1.94, 1.93, 1.92, 1.91, 1.90, 1.89, 1.88, 1.87, 1.86, 1.85, 1.84, 1.83, 1.82, 1.81, 1.80, 1.79, 1.78, 1.77, 1.76, 1.75, 1.74, 1.73, 1.72, 1.71, 1.70, 1.69, 1.68, 1.67, 1.66, 1.65, 1.64, 1.63, 1.62, 1.61, 1.60, 1.59, 1.58, 1.57, 1.56, 1.55, 1.54, 1.53, 1.52, 1.51, 1.50, 1.49, 1.48, 1.47, 1.46, 1.45, 1.44, 1.43, 1.42, 1.41, 1.40, 1.39, 1.38, 1.37, 1.36, 1.35, 1.34, 1.33, 1.32, 1.31, 1.30, 1.29, 1.28, 1.27, 1.26, 1.25, 1.24, 1.23, 1.22, 1.21, 1.20, 1.19, 1.18, 1.17, 1.16, 1.15

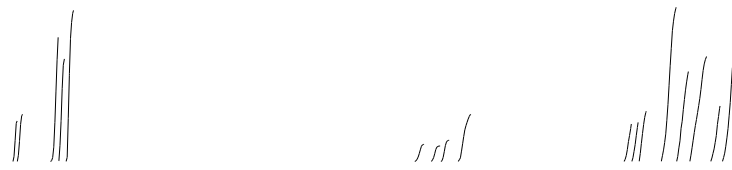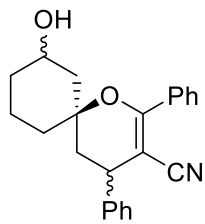

4a/4a'/4a''

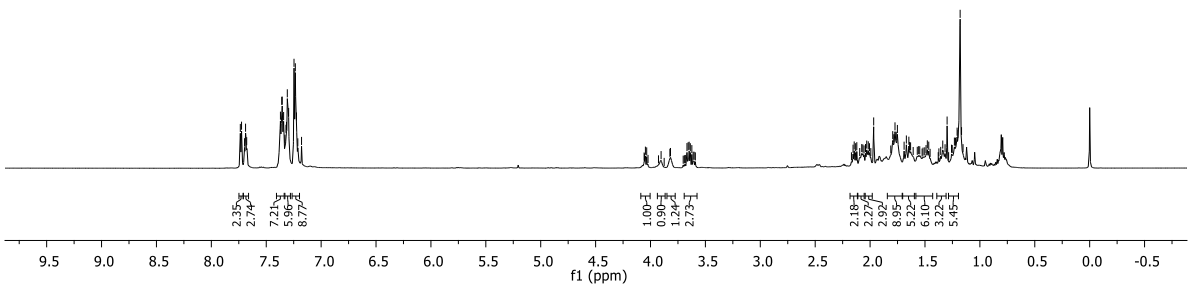

164.93, 164.57, 141.47, 141.45, 141.39, 141.18, 139.18, 128.58, 128.56, 128.50, 127.93, 127.88, 119.88, 119.84, 87.46, 87.05, 86.94, 86.78, 79.98, 77.44, 77.23, 77.02, 72.92, 67.02, 66.79, 66.63, 60.62, 46.21, 42.75, 42.62, 39.62, 38.40, 38.30, 37.97, 37.33, 36.83, 36.78, 34.94, 34.06, 33.04, 31.47, 30.96, 29.87, 24.84, 22.87, 20.03, 18.03

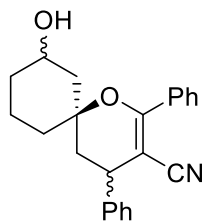

4a/4a'/4a''

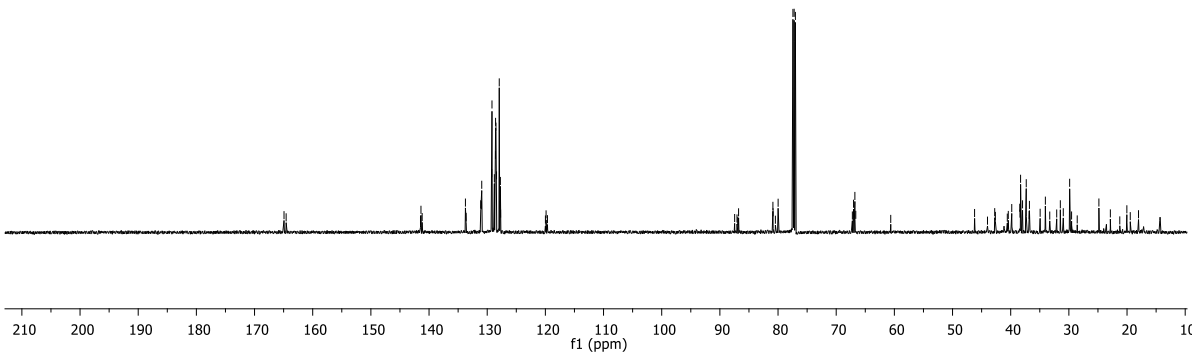

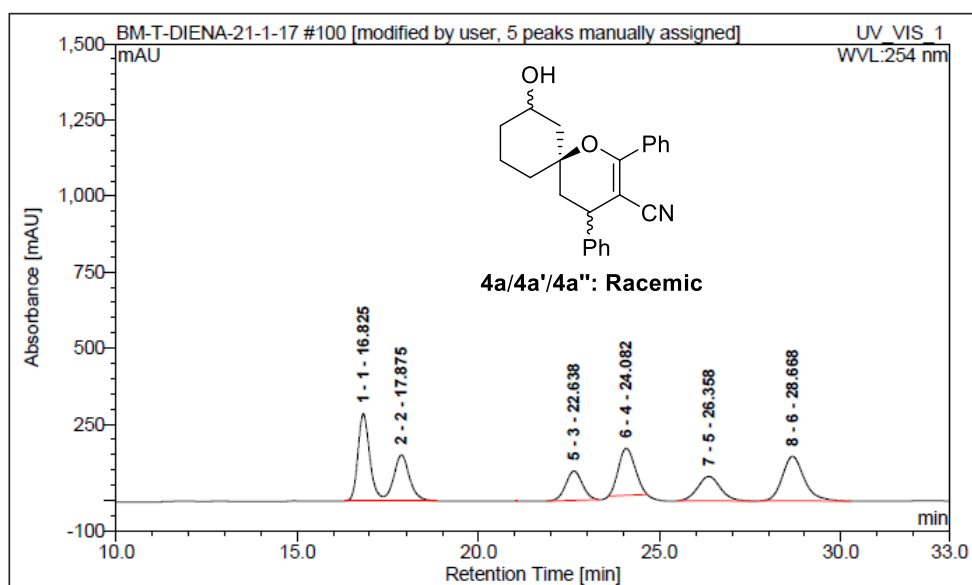

| No. | Peak Name | Ret.Time (detected)<br>min | Area<br>mAU*min | Rel.Area(ident.)<br>% | Height<br>mAU | Amount |
|-----|-----------|----------------------------|-----------------|-----------------------|---------------|--------|
| 1   | 1         | 16.83                      | 105.3329        | 22.08478598           | 286.2953      | n.a.   |
| 2   | 2         | 17.88                      | 78.25188        | 16.40679773           | 151.0108      | n.a.   |
| 5   | 3         | 22.64                      | 50.45645        | 10.57902753           | 95.56473      | n.a.   |
| 6   | 4         | 24.08                      | 81.62027        | 17.11303673           | 154.0356      | n.a.   |
| 7   | 5         | 26.36                      | 58.1882         | 12.20011648           | 80.28439      | n.a.   |
| 8   | 6         | 28.67                      | 103.098         | 21.61623556           | 146.334       | n.a.   |

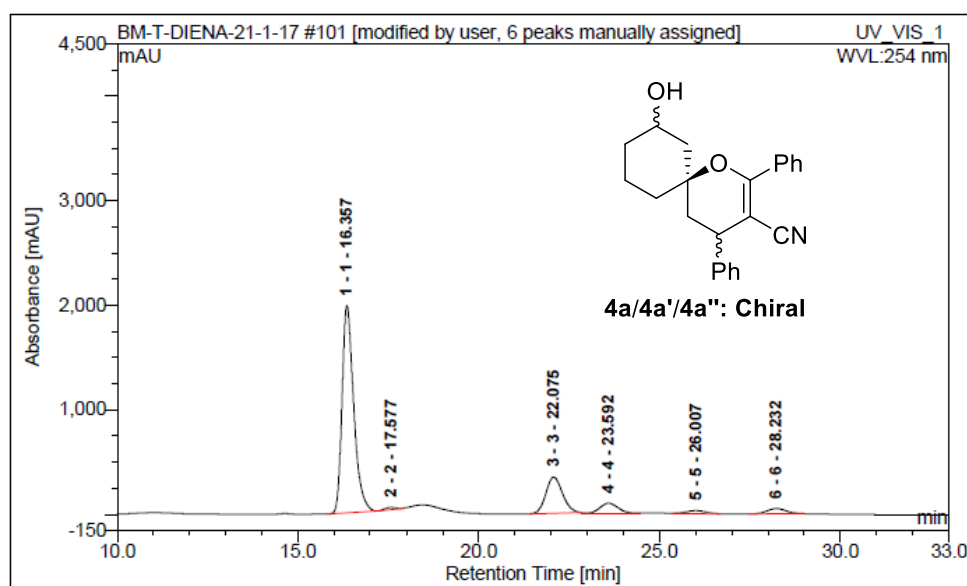

| No. | Peak Name | Ret.Time (detected)<br>min | Area<br>mAU*min | Rel.Area(ident.)<br>% | Height<br>mAU | Amount |
|-----|-----------|----------------------------|-----------------|-----------------------|---------------|--------|
| 1   | 1         | 16.36                      | 740.0622        | 71.63109638           | 1981.99       | n.a.   |
| 2   | 2         | 17.58                      | 6.864653        | 0.6644342582          | 19.84202      | n.a.   |
| 3   | 3         | 22.08                      | 184.8126        | 17.88813357           | 346.5213      | n.a.   |
| 4   | 4         | 23.59                      | 50.99049        | 4.935402256           | 93.07691      | n.a.   |
| 5   | 5         | 26.01                      | 18.00049        | 1.742279269           | 29.07569      | n.a.   |
| 6   | 6         | 28.23                      | 32.427          | 3.138654268           | 51.481        | n.a.   |

## References:

1. X. Fu, S. Zhang, J. Yin, T. L. McAllister, S. A. Jiang, C.-H. Tann, T. Thiruvengadam and F. Zhang, *Tetrahedron Letters*, 2002, **43**, 573.
2. M. S. Manna and S. Mukherjee, *Chem. Eur. J.*, 2012, **18**, 15277.
